# Supplementary material for: New α- and β-cyclodextrin derivatives with cinchona alkaloids used in asymmetric organocatalytic reactions
Source: publisher site journal article supplement (doi:10.3762/bjoc.15.80), 2019-04-01
Supplement: Additional file 1 [file 1860-5397-15-80-S1.pdf]

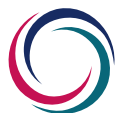

## Supporting Information

for

### **New $\alpha$ - and $\beta$ -cyclodextrin derivatives with cinchona alkaloids used in asymmetric organocatalytic reactions**

Iveta Chena Tichá, Simona Hybelbauerová and Jindřich Jindřich

*Beilstein J. Org. Chem.* **2019**, *15*, 830–839. doi:10.3762/bjoc.15.80

### **Experimental procedures, characterization data, copies of NMR spectra and chiral HPLC analysis**

## Table of contents

|                                                                                                    |     |
|----------------------------------------------------------------------------------------------------|-----|
| Instruments and materials .....                                                                    | S2  |
| General information for NMR elucidation of CD catalysts .....                                      | S3  |
| General procedure for the preparation of monosubstituted non-methylated CD derivatives (GP1) ..... | S4  |
| General procedure for the preparation of monosubstituted permethylated CD derivatives (GP2) .....  | S11 |
| Preparation of disubstituted $\alpha$ -CD derivatives .....                                        | S18 |
| Catalytic activity of CD derivatives .....                                                         | S19 |
| References .....                                                                                   | S20 |
| $^1\text{H}$ and $^{13}\text{C}$ NMR spectra of prepared CD derivatives .....                      | S21 |
| HRMS spectra of prepared CD compounds .....                                                        | S38 |
| Chiral HPLC chromatograms .....                                                                    | S44 |

## Instruments and materials

$\alpha$  and  $\beta$ -CD were purchased from Wacker Chemie, Germany. (-)-Cinchonidine (96%), cinchonine (98%), quinine (90%), quinidine (98%), propargyl bromide (80% in toluene), copper(I) iodide, and *p*-toluenesulfonyl chloride were purchased from Sigma-Aldrich. Sodium azide, *N,N*-dimethylformamide, tetrahydrofuran, acetonitrile (ACN), and pyridine were purchased from Penta Chemicals, Czech Republic.

Silica gel 60 (0.040–0.063 mm) was used for column chromatography and TLC was performed on aluminum sheets with a layer of Silica gel 60 F<sub>254</sub>, both purchased from Merck, Germany. Ratio of solvents in elution mixtures is given as volume/volume. Argon was used as an inert gas. Spots on TLC plates were detected by using an UV lamp ( $\lambda = 254$  nm for cinchonine and cinchonidine derivatives and  $\lambda = 365$  nm for quinine and quinidine derivatives) and by dipping the TLC plates in sulfuric acid (50% aqueous solution) followed by heating with a heat gun. Plates were developed in a saturated chamber in eluent A: ACN/H<sub>2</sub>O/conc. aq. NH<sub>3</sub> 10:5:1 or in eluent B: CHCl<sub>3</sub>/MeOH/conc. aq. NH<sub>3</sub> 20:1:0.1.

For IR measurements, samples were mixed with KBr and measured on a Thermo Nicolet AVATAR 370 FT-IR spectrometer using DRIFT method. Specific optical rotation was done on Rudolph Research AUTOPOL III polarimeter at 589 nm (sodium D line) and values of  $[\alpha]^{25}_{\text{D}}$  are reported together with used concentration (*c*, g/100 mL) and solvent.

Mass spectra (HRMS) were measured on Agilent 6530Q-TOF MS spectrometer. Samples were dissolved in a mixture of ACN/H<sub>2</sub>O.

Chiral HPLC measurements were carried out using a LC20AD Shimadzu liquid chromatograph with SPD-M20A diode array detector with column Daicel Chiralpak® IB.

NMR spectra were recorded on a Varian VNMRs 300 ( $\nu(^1\text{H}) = 299.94$  MHz,  $\nu(^{13}\text{C}) = 75.43$  MHz) (for non-CD derivatives) or on a Bruker Avance III ( $\nu(^1\text{H}) = 600.17$  MHz,  $\nu(^{13}\text{C}) = 150.04$  MHz) in deuterated solvents and are referenced to residual solvent peak. Chemical shifts are given on the  $\delta$ -scale; coupling constants *J* are given in Hz. NMR characterization was done by using <sup>1</sup>H, <sup>13</sup>C, DEPT and 2D NMR experiments such as COSY, HSQC and HMBC. The most common numbering of cinchona alkaloids atoms [1] for NMR spectra transcription was used (Figure S1).

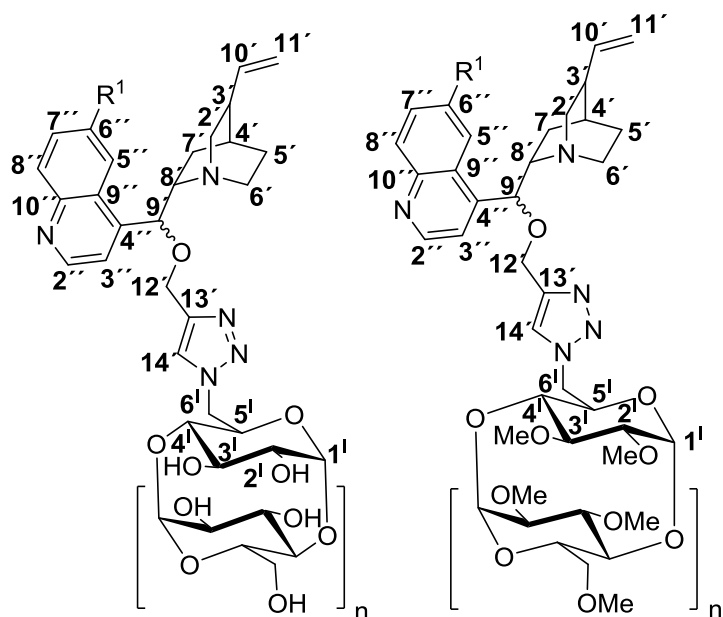

**Figure S1:** Numbering of atoms in cyclodextrin derivative structures used in NMR.

## General information for NMR elucidation of CD catalysts

NMR elucidation of new CD derivatives was done using 2D NMR techniques; nevertheless, the exact positions of some peaks were problematic, particularly on the quinuclidine skeleton (5', 6', 7', 8', 9'). Especially, H-9' (C-9') signals are usually not seen in  $^1\text{H}$  NMR or  $^{13}\text{C}$  NMR, not even in  $^1\text{H}$ - $^1\text{H}$  COSY, HSQC or HMBC and also C-7' and C-5' signals are not fully seen in some  $^{13}\text{C}$  NMR spectra especially in case of non-methylated CDs.

## General procedure for the preparation of monosubstituted non-methylated CD derivatives (GP1)

*For  $\alpha$ -CD derivatives:* The starting material, 9-*O*-propargyl cinchona alkaloid **3a–d** (0.13 mmol), was dissolved in distilled (10 min-sonicated under Ar atmosphere) THF (0.5 mL). Then, 6<sup>l</sup>-azido-6<sup>l</sup>-deoxy- $\alpha$ -CD (**1**, 0.10 mmol), prepared according to the literature [2], was dissolved in distilled (10 min-sonicated under Ar atmosphere) H<sub>2</sub>O (0.4 mL) and added to the stirred solution of the cinchona alkaloid. Finally, copper iodide (0.02 mmol), suspended in H<sub>2</sub>O (0.1 mL), was added and the reaction mixture stirred at 50 °C for 2–3 h.

*For  $\beta$ -CD derivatives:* The starting material, 9-*O*-propargyl cinchona alkaloid **3a–3d** (0.11 mmol) was dissolved in distilled (10 min-sonicated under Ar atmosphere) DMF (0.5 mL). The second starting material, 6<sup>l</sup>-azido-6<sup>l</sup>-deoxy- $\beta$ -CD [2] (**2**, 0.09 mmol), was dissolved in distilled (10 min-sonicated under Ar atmosphere) DMF (0.5 mL) and added to the stirring solution of the cinchona alkaloid. Finally, copper iodide (0.02 mmol), suspended in (10 min-sonicated under Ar atmosphere) DMF (0.1 mL), was added and the reaction mixture stirred at 60 °C for 2–3 h.

The conversion to product was monitored by TLC in eluent A. After full conversion, the reaction mixture was slowly added to stirring acetone (75 mL) resulting in white-yellow precipitate. The solid was recovered by filtration, washed with acetone (3 × 20 mL) and dried to constant weight in a vacuum drying box in the presence of P<sub>2</sub>O<sub>5</sub> and KOH. The crude product was purified by column chromatography (50 g of silica gel) with ACN/H<sub>2</sub>O/conc. aq. NH<sub>3</sub> 12:5:1 as mobile phase. When the conversion to the product was incomplete, the starting material could be eventually recovered (eluted as the second compound). Eye-visible blue precipitation at the top of the column was observed as copper cations interact with ammonia. The purified product was dried at 50 °C in high vacuum.

### 6<sup>l</sup>-Deoxy-6<sup>l</sup>-(4-(((*S*)-quinolin-4-yl(5-vinylquinuclidin-2-yl)methoxy)methyl)-1*H*-1,2,3-triazol-1-yl)- $\alpha$ -CD (**4a**)

The compound **4a** was prepared according to the general procedure (**GP1**) from 6<sup>l</sup>-azido-6<sup>l</sup>-deoxy- $\alpha$ -CD (**1**, 164 mg, 0.16 mmol), 9-*O*-propargyl-cinchonine (**3a**, 71 mg, 0.2 mmol) and copper iodide (6 mg, 0.03 mmol). The product was obtained as white-yellow solid (168 mg, 77% yield). TLC: *R*<sub>F</sub> = 0.45 (eluent A).

<sup>1</sup>H NMR (DMSO-*d*<sub>6</sub>):  $\delta$  (ppm): 8.96 – 8.94 (m, 1H, H-2'), 8.39 – 8.37 (m, 1H, H-8'), 8.14 – 8.13 (s, 1H, H-14'), 8.10 – 8.08 (m, 1H, H-5'), 7.82 – 7.80 (m, 1H, H-6'), 7.70 – 7.68 (m, 1H, H-7'), 7.64 – 7.63 (m, 1H, H-3'), 5.89 – 5.87 (m, 1H, H-10'), 5.65 – 5.35 (m, 12H, OH-2, OH-3), 5.06 – 5.04 (m, 1H, H-1<sup>l</sup>), 5.05 – 5.03 (m, 2H, H-11'), 4.86 – 4.72 (m, 5H, H-1), 4.84 – 4.83 (m, 2H, H-6<sup>l</sup>), 4.58 – 4.50 (m, 5H, OH-6), 4.52 – 4.50 (m, 2H, H-12'), 4.02 – 4.00

(m, 1H, H-5<sup>l</sup>), 3.84 – 3.18 (m, 33H, H-2, H-3, H-4, H-5, H-6), 3.40 – 3.38 (m, 1H, H-8'), 3.14 – 3.12 (m, 2H, H-2'), 3.08 – 3.06 (m, 1H, H-6a'), 2.95 – 2.94 (m, 1H, H-6b'), 2.48 – 2.45 (m, 1H, H-3'), 1.81 – 1.79 (m, 1H, H-4'), 1.65 – 1.63 (m, 2H, H-5'), 1.29 – 1.27 (m, 2H, H-7').

H-9' and C-9' signals are not seen.

**<sup>13</sup>C NMR (DMSO-d<sub>6</sub>):** δ (ppm): 150.24 (C-2'), 147.97 (C-10''\*), 143.71 (C-4''\*), 142.67 (C-13'), 138.56 (C-10'), 129.81 (C-5'), 129.34 (C-6'), 126.98 (C-7'), 126.14 (C-14'), 125.80 (C-9'), 123.75 (C-8'), 119.07 (C-3'), 115.79 (C-11'), 101.59 (6 × C-1), 82.42 (6 × C-4), 72.62 (5 × C-5, 6 × C-3, 6 × C-2), 69.58 (C-5<sup>l</sup>), 61.93 (C-12'), 60.02 (5 × C-6), 59.36 (C-8'), 49.96 (C-6<sup>l</sup>), 48.62 (C-6'), 47.48 (C-2'), 37.25 (C-3'), 26.98 (C-4'), 23.80 (C-7'), 23.57 (C-5').

Signals tagged with \* can be mutually interchanged.

HRMS (ESI): found 1330.5064. For C<sub>58</sub>H<sub>83</sub>N<sub>5</sub>O<sub>30</sub> [M+H]<sup>+</sup> calculated 1330.5196.

IR (KBr) 3291, 3105, 2938, 1640, 1413, 1240, 1150, 1076, 1039 cm<sup>-1</sup>.

[α]<sub>D</sub><sup>25</sup> = +61.7° (c = 0.30, DMSO).

### **6<sup>l</sup>-Deoxy-6<sup>l</sup>-(4-(((*R*)-quinolin-4-yl(5-vinylquinuclidin-2-yl)methoxy)methyl)-1*H*-1,2,3-triazol-1-yl)-α-CD (4b)**

The compound **4b** was prepared according to the general procedure (**GP1**) from 6<sup>l</sup>-azido-6<sup>l</sup>-deoxy-α-CD (**1**, 100 mg, 0.10 mmol), 9-*O*-propargyl-cinchonidine (**3b**, 43 mg, 0.13 mmol) and copper iodide (4 mg, 0.02 mmol). The product was obtained as white-yellow solid (115 mg, 86% yield). TLC: *R*<sub>F</sub> = 0.45 (eluent A).

**<sup>1</sup>H NMR (DMSO-d<sub>6</sub>):** δ (ppm): 8.96 – 8.94 (m, 1H, H-2'), 8.43 – 8.40 (m, 1H, H-8'), 8.27 – 8.24 (s, 2H, H-14'), 8.12 – 8.09 (m, 1H, H-5'), 7.85 – 7.81 (m, 1H, H-6'), 7.73 – 7.69 (m, 1H, H-7'), 7.69 – 7.64 (m, 1H, H-3'), 5.80 – 5.76 (m, 1H, H-10'), 5.67 – 5.34 (m, 12H, OH-2, OH-3), 5.04 – 5.00 (m, 1H, H-11a'), 5.01 – 4.99 (m, 1H, H-1<sup>l</sup>), 4.95 – 4.93 (m, 1H, H-1b'), 4.84 – 4.73 (m, 5H, H-1), 4.81 – 4.79 (m, 1H, H-6a<sup>l</sup>), 4.61 – 4.59 (m, 1H, H-6b<sup>l</sup>), 4.58 – 4.50 (m, 5H, OH-6), 4.55 – 4.52 (m, 1H, H-12a'), 4.50 – 4.47 (m, 1H, H-12b'), 4.10 – 4.08 (m, 1H, H-5<sup>l</sup>), 3.88 – 3.16 (m, 33H, H-2, H-3, H-4, H-5, H-6), 3.59 – 3.56 (m, 2H, H-6'), 3.51 – 3.48 (m, 1H, H-8'), 3.32 – 3.29 (m, 1H, H-2a'), 2.92 – 2.89 (m, 1H, H-2b'), 2.51 – 2.49 (m, 1H, H-3'), 1.89 – 1.85 (m, 1H, H-4'), 1.27 – 1.23 (m, 2H, H-5'), 1.24 – 1.21 (m, 2H, H-7').

H-9' and C-9' signals are not seen.

**<sup>13</sup>C NMR (DMSO-d<sub>6</sub>):** δ (ppm): 150.19 (C-2'), 147.99 (C-10''\*), 143.56 (C-4''\*), 142.85 (C-13'), 139.69 (C-10'), 129.77 (C-5'), 129.39 (C-6'), 127.14 (C-7'), 125.94 (C-14'), 125.75 (C-9'), 123.87 (C-8'), 119.11 (C-3'), 115.70 (C-11'), 101.30 (6 × C-1), 82.57 (6 × C-4),

72.35 (6 × C-2, 6 × C-3, 5 × C-5), 69.41 (C-5<sup>l</sup>), 62.03 (C-12'), 60.14 (5 × C-6), 59.32 (C-8'), 53.92 (C-2'), 50.25 (C-6<sup>l</sup>), 42.69 (C-6'), 37.45 (C-3'), 30.64 (C-7'), 26.62 (C-4'), 22.59 (C-5').

Signals tagged with \* can be mutually interchanged.

HRMS (ESI): found 1330.5151. For C<sub>58</sub>H<sub>83</sub>N<sub>5</sub>O<sub>30</sub> [M+H]<sup>+</sup> calculated 1330.5196.

IR (KBr) 3288, 3166, 3105, 2926, 2361, 1156, 1120, 1075, 1036 cm<sup>-1</sup>.

[α]<sub>D</sub><sup>25</sup> = +25.8° (c = 0.33, DMSO).

### **6<sup>l</sup>-Deoxy-6<sup>l</sup>-(((4-(((S)-6-methoxyquinolin-4-yl)(5-vinylquinuclidin-2-yl)methoxy)methyl)-1H-1,2,3-triazol-1-yl)-α-CD (4c)**

The compound **4c** was prepared according to the general procedure (**GP1**) from 6<sup>l</sup>-azido-6<sup>l</sup>-deoxy-α-CD (**1**, 316 mg, 0.3 mmol), 9-O-propargyl-quinine (**3c**, 149 mg, 0.4 mmol) and copper iodide (12 mg, 0.06 mmol). The product was obtained as white-yellow solid (306 mg, 72% yield). TLC: R<sub>F</sub> = 0.45 (eluent A).

**<sup>1</sup>H NMR (DMSO-d<sub>6</sub>):** δ (ppm): 8.76 – 8.75 (m, 1H, H-2'), 8.21 (s, 1H, H-14'), 7.98 – 7.96 (m, 1H, H-8'), 7.87 – 7.86 (m, 1H, H-3'), 7.56 – 7.55 (m, 1H, H-5'), 7.44 – 7.42 (m, 1H, H-7'), 5.82 – 5.76 (m, 1H, H-10'), 5.65 – 5.36 (m, 12H, OH-2, OH-3), 5.01 – 4.99 (m, 1H, H-11a'), 4.94 – 4.92 (m, 1H, H-11b'), 4.82 – 4.73 (m, 5H, H-1), 4.80 – 4.79 (m, 2H, H-6<sup>l</sup>), 4.58 – 4.44 (m, 5H, OH-6), 4.52 – 4.50 (m, 1H, H-12a'), 4.47 – 4.45 (m, 1H, H-12b'), 4.05 – 4.04 (m, 1H, H-5<sup>l</sup>), 3.95 (s, 3H, OCH<sub>3</sub>-6'), 3.84 – 3.13 (m, 33H, H-2, H-3, H-4, H-5, H-6), 3.33 – 3.31 (m, 1H, 8'), 3.24 – 3.22 (m, 1H, H-5<sup>l</sup>), 3.13 – 3.12 (m, 2H, H-2'), 2.75 – 2.73 (m, 2H, H-6'), 2.38 – 2.36 (m, 1H, H-3'), 1.80 – 1.78 (m, 1H, H-4'), 1.69 – 1.65 (m, 1H, H-5a'), 1.55 – 1.52 (m, 1H, H-5b'), 1.53 – 1.51 (m, 2H, H-7').

H-9' and C-9' signals are not seen.

**<sup>13</sup>C NMR (DMSO-d<sub>6</sub>):** δ (ppm): 157.41 (C-6'), 147.50 (C-2'), 147.20 (C-4''), 144.01 (C-10''), 143.12 (C-13'), 140.79 (C-10'), 131.26 (C-8'), 127.09 (C-9'), 126.07 (C-14'), 121.53 (C-7'), 119.07 (C-3'), 114.96 (C-11'), 102.33 (C-5'), 101.90 (6 × C-1), 83.16 (C-4<sup>l</sup>), 82.66 (5 × C-4), 72.22 (6 × C-2, 6 × C-3, 5 × C-5), 69.52 (C-5<sup>l</sup>), 61.93 (C-12'), 60.18 (5 × C-6), 59.38 (C-8'), 55.97 (OCH<sub>3</sub>-6'), 54.59 (C-2'), 50.12 (C-6<sup>l</sup>), 42.39 (C-6'), 38.18 (C-3'), 26.79 (C-4'), 25.74 (C-5'), 23.18 (C-7').

Signals tagged with \* can be mutually interchanged.

HRMS (ESI): found 1360.5155. For C<sub>59</sub>H<sub>85</sub>N<sub>5</sub>O<sub>31</sub> calculated [M+H]<sup>+</sup> 1360.5301.

IR (KBr) 3282, 2920, 1625, 1512, 1431, 1242, 1153, 1078, 1039 cm<sup>-1</sup>.

[α]<sub>D</sub><sup>25</sup> = +57.4° (c = 0.31, DMSO).

### **6<sup>I</sup>-Deoxy-6<sup>I</sup>-((4-(((*R*)-(6-methoxyquinolin-4-yl)(5-vinylquinuclidin-2-yl)methoxy)methyl)-1*H*-1,2,3-triazol-1-yl)-α-CD (4d)**

The compound **4d** was prepared according to the general procedure (**GP1**) from 6<sup>I</sup>-azido-6<sup>I</sup>-deoxy-α-CD (**1**, 174 mg, 0.17 mmol), 9-*O*-propargyl-quinidine (**3d**, 82 mg, 0.23 mmol) and copper iodide (6 mg, 0.03 mmol). The product was obtained as white-yellow solid (176 mg, 74% yield). TLC:  $R_F$  = 0.45 (eluent A).

**<sup>1</sup>H NMR (DMSO-*d*<sub>6</sub>):** δ (ppm): 8.80 – 8.79 (m, 1H, H-2''), 8.16 – 8.14 (m, 1H, H-14'), 8.00 – 7.99 (m, 1H, H-8''), 7.60 – 7.56 (m, 1H, H-3''), 7.57 – 7.55 (m, 1H, H-5''), 7.48 – 7.45 (m, 1H, H-7''), 5.88 – 5.81 (m, 1H, H-10'), 5.67 – 5.42 (m, 12H, OH-2, OH-3), 5.07 – 5.01 (m, 1H, H-1<sup>I</sup>), 5.05 – 5.03 (m, 1H, H-11a'), 5.02 – 5.00 (m, 1H, H-11b'), 4.97 – 4.74 (m, 5H, H-1), 4.82 – 4.80 (m, 1H, H-6a<sup>I</sup>), 4.76 – 4.74 (m, 1H, H-6b<sup>I</sup>), 4.64 – 4.50 (m, 5H, OH-6), 4.55 – 4.53 (m, 2H, H-12'), 3.99 (s, 3H, OCH<sub>3</sub>-6''), 3.98 (m, 1H, H-5<sup>I</sup>), 3.86 – 3.18 (m, 33H, H-2, H-3, H-4, H-5, H-6), 3.69 – 3.67 (m, 1H, H-2a'), 3.49 – 3.47 (m, 1H, H-8'), 3.44 – 3.42 (m, 1H, H-9'), 3.28 – 3.26 (m, 1H, H-2b'), 3.23 – 3.21 (m, 1H, H-6a'), 3.07 – 3.05 (m, 1H, H-6b'), 2.53 – 2.51 (m, 1H, H-3'), 1.85 – 1.82 (m, 1H, H-4'), 1.71 – 1.69 (m, 2H, H-7'), 1.23 – 1.21 (m, 2H, H-5').

**<sup>13</sup>C NMR (DMSO-*d*<sub>6</sub>):** δ (ppm): 157.73 (C-6''), 147.57 (C-2''), 144.05 (C-10''\*), 142.69 (C-13'), 141.43 (C-4''\*), 138.06 (C-10'), 131.34 (C-8''), 126.64 (C-9'), 126.13 (C-14'), 121.88 (C-7''), 118.80 (C-3''), 116.02 (C-11'), 101.89 (6 × C-1), 101.20 (C-5''), 82.21 (6 × C-4), 73.10 (C-9'), 72.06 (6 × C-2, 6 × C-3, 5 × C-5), 69.66 (C-5<sup>I</sup>), 62.02 (C-12'), 60.20 (5 × C-6), 58.81 (C-8'), 56.28 (OCH<sub>3</sub>-6''), 49.98 (C-6<sup>I</sup>), 48.43 (C-6'), 47.25 (C-2'), 36.75 (C-3'), 28.98 (C-5'), 26.87 (C-4'), 23.12 (C-7').

Signals tagged with \* can be mutually interchanged.

HRMS (ESI): found 1360.5182. For C<sub>59</sub>H<sub>85</sub>N<sub>5</sub>O<sub>31</sub> calculated [M+H]<sup>+</sup> 1360.5301.

IR (KBr) 3381, 3330, 2995, 1625, 1515, 1365, 1245, 1156, 1054 cm<sup>-1</sup>.

[α]<sub>D</sub><sup>25</sup> = +60.0° (c = 0.30, DMSO).

### **6<sup>I</sup>-Deoxy-6<sup>I</sup>-((4-(((*S*)-quinolin-4-yl)(5-vinylquinuclidin-2-yl)methoxy)methyl)-1*H*-1,2,3-triazol-1-yl)-β-CD (5a)**

The compound **5a** was prepared according to the general procedure (**GP1**) from 6<sup>I</sup>-azido-6<sup>I</sup>-deoxy-β-CD (**2**, 100 mg, 0.09 mmol) and 9-*O*-propargyl-cinchonine (**3a**, 37 mg, 0.11 mmol) and copper iodide (3 mg, 0.02 mmol). The product was obtained as white-yellow solid (114 mg, 89% yield). TLC:  $R_F$  = 0.39 (eluent A).

**<sup>1</sup>H NMR (DMSO-*d*<sub>6</sub>):** δ (ppm): 8.93 – 8.90 (m, 1H, H-2'), 8.34 – 8.31 (m, 1H, H-8'), 8.08 – 8.07 (m, 1H, H-5'), 8.03 – 8.01 (m, 1H, H-14'), 7.82 – 7.76 (m, 1H, H-6'), 7.67 – 7.65 (m, 1H, H-7'), 7.60 – 7.58 (m, 1H, H-3'), 5.96 – 5.93 (m, 1H, H-10'), 5.85 – 5.64 (m, 14H, OH-2, OH-3), 5.05 – 4.91 (m, 7H, H-1), 5.03 – 5.01 (m, 2H, H-11'), 4.85 – 4.83 (m, 1H, H-6a<sup>l</sup>), 4.64 – 4.62 (m, 1H, H-6b<sup>l</sup>), 4.63 – 4.51 (m, 6H, OH-6), 4.46 – 4.44 (m, 1H, H-12a'), 4.38 – 4.36 (m, 1H, H-12b'), 3.98 – 3.96 (m, 1H, H-5<sup>l</sup>), 3.79 – 3.24 (m, 39H, H-2, H-3, H-4, H-5, H-6), 3.17 – 3.15 (m, 1H, H-8'), 3.10 – 3.08 (m, 1H, H-2a'), 2.74 – 2.72 (m, 1H, H-2b'), 2.60 – 2.58 (m, 1H, H-6a'), 2.24 – 2.22 (m, 1H, H-3'), 1.83 – 1.81 (m, 1H, H-7a'), 1.69 – 1.67 (m, 1H, H-4'), 1.49 – 1.47 (m, 2H, H-5'), 1.48 – 1.46 (m, 1H, H-6b'), 1.43 – 1.41 (m, 1H, H-7b').

H-9' signal is not seen.

**<sup>13</sup>C NMR (DMSO-*d*<sub>6</sub>):** δ (ppm): 150.13 (C-2'), 147.93 (C-10''\*), 146.21 (C-4''\*), 143.20 (C-13'), 140.29 (C-10'), 129.75 (C-5'), 129.50 (C-9'), 129.06 (C-6'), 126.54 (C-7'), 125.40 (C-14'), 123.94 (C-8'), 119.70 (C-3'), 114.84 (C-11'), 101.94 (7 × C-1), 81.60 (7 × C-4), 80.60 (C-9'), 72.22 (7 × C-2, 7 × C-3, 6 × C-5), 69.83 (C-5<sup>l</sup>), 61.71 (C-12'), 60.10 (6 × C-6), 60.05 (C-8'), 50.11 (C-6<sup>l</sup>), 47.85 (C-2'), 39.50 (C-3'), 27.39 (C-4'), 25.41 (C-5'), 48.89 (C-6'), 25.41 (C-7').

Signals tagged with \* can be mutually interchanged.

HRMS (ESI): found 1492.5610. For C<sub>64</sub>H<sub>93</sub>N<sub>5</sub>O<sub>35</sub> calculated [M+H]<sup>+</sup> 1492.5724.

IR (KBr) 3348, 3105, 2929, 1646, 1422, 1156, 1105, 1081, 1033 cm<sup>-1</sup>.

[α]<sub>D</sub><sup>25</sup> = + 75.0° (c = 0.30, DMSO).

### **6<sup>l</sup>-Deoxy-6<sup>l</sup>-((4-(((*R*)-quinolin-4-yl(5-vinylquinuclidin-2-yl)methoxy)methyl)-1*H*-1,2,3-triazol-1-yl)-β-CD (5b)**

The compound **5b** was prepared according to the general procedure (**GP1**) from 6<sup>l</sup>-azido-6<sup>l</sup>-deoxy-β-CD (**2**, 100 mg, 0.09 mmol), 9-*O*-propargyl-cinchonidine (**3b**, 37 mg, 0.11 mmol) and copper iodide (3 mg, 0.02 mmol). The product was obtained as white-yellow solid (90 mg, 70% yield). TLC: *R*<sub>F</sub> = 0.39 (eluent A).

**<sup>1</sup>H NMR (DMSO-*d*<sub>6</sub>):** δ (ppm): 8.93 – 8.91 (m, 1H, H-2'), 8.39 – 8.37 (m, 1H, H-8'), 8.09 – 8.07 (m, 1H, H-5'), 8.08 – 8.07 (m, 1H, H-14'), 7.80 – 7.78 (m, 1H, H-6'), 7.66 (m, 1H, H-7'), 7.61 (m, 1H, H-3'), 5.81 – 5.79 (m, 1H, H-10'), 5.79 – 5.64 (m, 14H, OH-2, OH-3), 5.08 – 5.07 (m, 1H, H-1<sup>l</sup>), 5.00 – 4.98 (m, 1H, H-11a'), 4.93 – 4.91 (m, 1H, H-11b'), 4.87 – 4.85 (m, 1H, H-6a<sup>l</sup>), 4.85 – 4.81 (m, 6H, H-1), 4.63 – 4.49 (m, 6H, OH-6), 4.61 – 4.58 (m, 1H, H-6b<sup>l</sup>), 4.45 – 4.43 (m, 2H, H-12'), 3.99 – 3.97 (m, 1H, H-5<sup>l</sup>), 3.78 – 3.26 (m, 39H, H-2, H-3, H-4, H-5, H-6), 3.31 – 3.29 (m, 1H, H-6a'), 3.27 – 3.25 (m, 1H, H-8'), 3.00 – 2.98 (m, 1H, H-

2a'), 2.61 – 2.59 (m, 1H, H-6b'), 2.60 – 2.58 (m, 1H, H-2b'), 2.32 – 2.30 (m, 1H, H-3'), 1.77 – 1.75 (m, 1H, H-4'), 1.69 – 1.67 (m, 1H, H-5a'), 1.51 – 1.49 (m, 1H, H-5b'), 1.64 – 1.61 (m, 2H, H-7').

H-9' and C-9' signals are not seen.

**<sup>13</sup>C NMR (DMSO-d<sub>6</sub>):** δ (ppm): 150.13 (C-2'), 147.97 (C-10'), 145.50 (C-4'), 143.14 (C-13'), 141.24 (C-10'), 129.75 (C-5'), 129.17 (C-6'), 126.73 (C-7'), 126.24 (C-9'), 125.40 (C-14'), 123.94 (C-8'), 119.46 (C-3'), 114.76 (C-11'), 101.83 (7 × C-1), 81.75 (7 × C-4), 72.46 (7 × C-2, 7 × C-3, 6 × C-5), 69.81 (C-5<sup>l</sup>), 61.86 (C-12'), 60.10 (6 × C-6), 59.05 (C-8'), 55.14 (C-2'), 50.20 (C-6<sup>l</sup>), 42.13 (C-6'), 38.61 (C-3'), 26.20 (C-5'), 26.97 (C-4'), 22.96 (C-7').

Signals tagged with \* can be mutually interchanged. HRMS (ESI): found 1492.5604. For C<sub>64</sub>H<sub>93</sub>N<sub>5</sub>O<sub>35</sub> calculated [M+H]<sup>+</sup> 1492.5724.

IR (KBr) 3297, 2932, 1661, 1637, 1509, 1461, 1362, 1335, 1030 cm<sup>-1</sup>.

[α]<sub>D</sub><sup>25</sup> = +48.3° (c = 0.30, DMSO).

### **6<sup>l</sup>-Deoxy-6<sup>l</sup>-((4-(((S)-(6-methoxyquinolin-4-yl)(5-vinylquinuclidin-2-yl)methoxy)methyl)-1*H*-1,2,3-triazol-1-yl)-β-CD (5c)**

The compound **5c** was prepared according to the general procedure (**GP1**) from 6<sup>l</sup>-azido-6<sup>l</sup>-deoxy-β-CD (**2**, 100 mg, 0.09 mmol), 9-*O*-propargyl-quinine (**3c**, 41 mg, 0.11 mmol) and copper iodide (3 mg, 0.02 mmol). The product was obtained as white-yellow pure product (105 mg, 80% yield). TLC: *R*<sub>F</sub> = 0.43 (eluent A).

**<sup>1</sup>H NMR (DMSO-d<sub>6</sub>):** δ (ppm): 8.78 – 8.76 (m, 1H, H-2'), 8.21 – 8.19 (m, 1H, H-14'), 7.99 – 7.97 (m, 1H, H-8'), 7.66 – 7.64 (m, 1H, H-5'), 7.59 – 7.57 (m, 1H, H-3'), 7.46 – 7.44 (m, 1H, H-7'), 5.84 – 5.71 (m, 14H, OH-2, OH-3), 5.82 – 5.80 (m, 1H, H-10'), 5.07 – 5.05 (m, 1H, H-11a'), 5.04 – 4.95 (m, 7H, H-1), 4.94 – 4.92 (m, 1H, H-11b'), 4.95 – 4.93 (m, 1H, H-6a<sup>l</sup>), 4.64 – 4.50 (m, 6H, OH-6), 4.59 – 4.57 (m, 1H, H-6b<sup>l</sup>), 4.50 – 4.48 (m, 2H, H-12'), 4.10 – 4.08 (m, 1H, H-5<sup>l</sup>), 3.97 (s, 3H, OCH<sub>3</sub>-6'), 3.78 – 3.16 (m, 39H, H-2, H-3, H-4, H-5, H-6), 3.07 – 3.05 (m, 1H, H-8'), 3.75 – 3.73 (m, 2H, H-2'), 2.54 – 2.52 (m, 2H, H-6'), 2.42 – 2.40 (m, 1H, H-3'), 1.85 – 1.83 (m, 1H, H-4'), 1.77 – 1.75 (m, 1H, H-5a'), 1.59 – 1.57 (m, 1H, H-5b'), 1.30 – 1.28 (m, 2H, H-7').

H-9' and C-9' signals are not seen.

**<sup>13</sup>C NMR (DMSO-d<sub>6</sub>):** δ (ppm): 157.58 (C-6'), 147.44 (C-2'), 144.01 (C-10''), 144.01 (C-4''), 143.11 (C-13'), 140.31 (C-10'), 131.17 (C-8'), 127.09 (C-9'), 125.34 (C-14'), 121.67 (C-7'), 118.93 (C-3'), 115.17 (C-11'), 102.16 (C-5'), 101.50 (7 × C-1), 83.56 (C-4'), 81.70

(6 × C-4), 73.12 (7 × C-2, 7 × C-3, 6 × C-5), 61.95 (C-12'), 69.76 (C-5<sup>l</sup>), 60.05 (6 × C-6), 59.30 (C-8'), 56.07 (OCH<sub>3</sub>-6''), 54.39 (C-2'), 50.38 (C-6<sup>l</sup>), 42.53 (C-6'), 38.15 (C-3'), 26.85 (C-4'), 25.52 (C-5'), 25.15 (C-7').

Signals tagged with \* can be mutually interchanged.

HRMS (ESI): found 1522.5741. For C<sub>65</sub>H<sub>95</sub>N<sub>5</sub>O<sub>36</sub> calculated [M+H]<sup>+</sup> 1522.5831.

IR (KBr) 3396, 3330, 3073, 2935, 1655, 1622, 1419, 1237, 1030 cm<sup>-1</sup>.

[α]<sub>D</sub><sup>25</sup> = + 46.7° (c = 0.30, DMSO).

### **6<sup>l</sup>-Deoxy-6<sup>l</sup>-((4-(((R)-(6-methoxyquinolin-4-yl)(5-vinylquinuclidin-2-yl)methoxy)methyl)-1H-1,2,3-triazol-1-yl)-β-CD (5d)**

The compound **5d** was prepared according to the general procedure (**GP1**) from 6<sup>l</sup>-azido-6<sup>l</sup>-deoxy-β-CD (**2**, 100 mg, 0.09 mmol), 9-O-propargyl-quinidine (**3d**, 41 mg, 0.11 mmol) and copper iodide (3 mg, 0.02 mmol). The product was obtained as white-yellow solid (124 mg, 95% yield). TLC: *R*<sub>F</sub> = 0.43 (eluent A).

**<sup>1</sup>H NMR (DMSO-d<sub>6</sub>):** δ (ppm): 8.78 – 8.76 (m, 1H, H-2'), 8.09 – 8.05 (m, 1H, H-14'), 8.00 – 7.98 (m, 1H, H-8'), 7.58 – 7.56 (m, 1H, H-5'), 7.59 – 7.57 (m, 1H, H-3'), 7.46 – 7.44 (m, 1H, H-7'), 5.93 – 5.88 (m, 1H, H-10'), 5.86 – 5.70 (m, 14H, OH-2, OH-3), 5.05 – 4.75 (m, 7H, H-1), 5.02 – 5.00 (m, 2H, H-11'), 4.85 – 4.83 (m, 1H, H-6a<sup>l</sup>), 4.64 – 4.50 (m, 6H, OH-6), 4.63 – 4.60 (m, 1H, H-6b<sup>l</sup>), 4.49 – 4.46 (m, 1H, H-12a'), 4.40 – 4.38 (m, 1H, H-12b'), 3.98 – 3.95 (m, 1H, H-5<sup>l</sup>), 3.96 (s, 3H, OCH<sub>3</sub>-6''), 3.78 – 3.16 (m, 39H, H-2, H-3, H-4, H-5, H-6), 3.07 – 3.05 (m, 1H, H-8'), 3.75 – 3.73 (m, 2H, H-2'), 2.54 – 2.52 (m, 2H, H-6'), 2.30 – 2.28 (m, 1H, H-3'), 1.73 – 1.71 (m, 1H, H-4'), 1.65 – 1.62 (m, 2H, H-5'), 1.30 – 1.28 (m, 2H, H-7').

H-9' and C-9' signals are not seen.

**<sup>13</sup>C NMR (DMSO-d<sub>6</sub>):** δ (ppm): 157.20 (C-6''), 147.58 (C-2'), 144.0 (C-10''), 144.00 (C-4''), 143.17 (C-13'), 140.29 (C-10'), 131.24 (C-8'), 127.31 (C-9'), 125.41 (C-14'), 121.46 (C-7'), 119.31 (C-3'), 115.10 (C-11'), 101.50 (7 × C-1), 100.16 (C-5'), 83.26 (C-4<sup>l</sup>), 81.70 (6 × C-4), 73.12 (7 × C-2, 7 × C-3, 6 × C-5), 69.77 (C-5<sup>l</sup>), 61.66 (C-12'), 60.05 (6 × C-6), 59.30 (C-8'), 55.75 (OCH<sub>3</sub>-6''), 50.17 (C-6<sup>l</sup>), 48.76 (C-6'), 47.74 (C-2'), 38.15 (C-3'), 27.25 (C-4'), 25.52 (C-5'), 25.15 (C-7').

Signals tagged with \* can be mutually interchanged.

HRMS (ESI): found 1522.5646. For C<sub>65</sub>H<sub>95</sub>N<sub>5</sub>O<sub>36</sub> calculated [M+H]<sup>+</sup> 1522.5831.

IR (KBr) 3321, 2923, 2881, 1658, 1622, 1350, 1299, 1156, 1030 cm<sup>-1</sup>.

$[\alpha]_D^{25} = +76.7^\circ$  ( $c = 0.30$ , DMSO).

## General procedure for the preparation of monosubstituted permethylated CD derivatives (GP2)

Starting material, 9-*O*-propargyl cinchona alkaloids **3a–d** (0.10 mmol) was dissolved in distilled (10 min-sonicated under Ar atmosphere) DMF (0.5 mL). The second starting material, 6<sup>l</sup>-azido-6<sup>l</sup>-deoxy-permethyl- $\alpha$ -CD [3] (**6**, 0.08 mmol) or 6<sup>l</sup>-azido-6<sup>l</sup>-deoxy-permethyl- $\beta$ -CD [4] (**7**, 0.06 mmol), was dissolved in distilled (10 min-sonicated under Ar atmosphere) DMF (0.4 mL) and added to the solution of the cinchona alkaloid. Copper iodide (0.02 mmol), suspended in 10 min-sonicated under Ar atmosphere DMF (0.1 mL), was added to the reaction mixture and the mixture stirred at 50 °C for 16 h. The conversion to product was monitored on TLC in eluent B. After the starting material **6** or **7** disappeared on TLC, DMF was evaporated on rotary evaporator at 50 °C and the crude product was purified by column chromatography (50 g of silica gel) with CHCl<sub>3</sub>/MeOH/conc. aq. NH<sub>3</sub> 25:1:0.1 to 20:1:0.1 as mobile phase. When the conversion to the product was incomplete, the starting material could be eventually recovered (eluted as the first compound). Eye-visible blue precipitation at the top of the column was observed as copper cations interact with ammonia. The purified product was dried at 50 °C in high vacuum.

### 6<sup>l</sup>-Deoxy-6<sup>l</sup>-(4-(((*S*)-quinolin-4-yl(5-vinylquinuclidin-2-yl)methoxy)methyl)-1*H*-1,2,3-triazol-1-yl)-permethyl- $\alpha$ -CD (**8a**)

The compound **8a** was prepared according to the general procedure (GP2) from 6<sup>l</sup>-azido-6<sup>l</sup>-deoxy-permethyl- $\alpha$ -CD (**6**, 100 mg, 0.08 mmol), 9-*O*-propargyl-cinchonine (**3a**, 35 mg, 0.10 mmol) and copper iodide (3 mg, 0.02 mmol). The product was obtained white-yellow solid (75 mg, 59% yield). TLC:  $R_F = 0.40$  (eluent B).

<sup>1</sup>H NMR (MeOH-*d*<sub>4</sub>):  $\delta$  (ppm): 8.88 – 8.87 (m, 1H, H-2''), 8.29 – 8.27 (m, 1H, H-8''), 8.11 – 8.09 (m, 1H, H-5''), 7.94 (s, 1H, H-14'), 7.83 – 7.80 (m, 1H, H-6''), 7.72 – 7.69 (m, 1H, H-3''), 7.71 – 7.68 (m, 1H, H-7''), 6.03 – 5.97 (m, 1H, H-10'), 5.33 – 5.32 (m, 1H, H-1<sup>l</sup>), 5.07 – 5.01 (m, 5H, H-1), 5.04 – 5.00 (m, 2H, H-11'), 4.93 – 4.90 (m, 2H, H-6<sup>l</sup>), 4.58 (bs, 2H, H-12'), 4.21 – 4.18 (m, 1H, H-5<sup>l</sup>), 4.12 – 3.89 (m, 5H, H-5), 3.91 – 3.79 (m, 10H, H-6), 3.66 – 3.62 (m, 18H, OCH<sub>3</sub>-3), 3.57 – 3.55 (m, 1H, H-9'), 3.55 – 3.49 (m, 18H, OCH<sub>3</sub>-2), 3.61 – 3.49 (m, 12H, H-3, H-4), 3.37 – 3.35 (m, 1H, H-2a'), 3.32 – 3.25 (m, 15H, OCH<sub>3</sub>-6), 3.21 – 3.23 (m, 1H, H-8'), 3.19 – 3.10 (m, 6H, H-2), 2.89 – 2.86 (m, 1H, H-6a'), 2.88 – 2.82 (m, 1H, H-2b'), 2.77 – 2.73 (m, 1H, H-6b'), 2.32 – 2.29 (m, 1H, H-3'), 2.09 – 2.06 (m, 1H, H-7a'), 1.73 – 1.72 (m, 1H, H-4'), 1.60 – 1.51 (m, 2H, H-5'), 1.32 – 1.28 (m, 1H, H-7b').

**<sup>13</sup>C NMR (MeOH-d<sub>4</sub>):** δ (ppm): 150.98 (C-2'), 149.19 (C-10''\*), 147.89 (C-4''\*), 144.95 (C-13'), 141.46 (C-10'), 130.98 (C-6'), 130.31 (C-5'), 128.43 (C-7'), 127.89 (C-9'), 127.48 (C-14'), 124.59 (C-8'), 120.73 (C-3'), 115.52 (C-11'), 100.19 (6 × C-1), 83.07 (6 × C-2, 6 × C-3, 6 × C-4), 81.03 (C-9'), 72.83 (5 × C-5, 5 × C-6), 71.66 (C-5<sup>l</sup>), 63.50 (C-12'), 62.05 (6 × OCH<sub>3</sub>-3), 61.35 (C-8'), 59.39 (5 × OCH<sub>3</sub>-6), 58.64 (6 × OCH<sub>3</sub>-2), 52.41 (C-6<sup>l</sup>), 50.81 (C-6'), 50.09 (C-2'), 40.94 (C-3'), 29.43 (C-4'), 26.95 (C-5'), 23.11 (C-7').

Signals tagged with \* can be mutually interchanged.

HRMS (ESI): found 1568.7713. For C<sub>75</sub>H<sub>117</sub>N<sub>5</sub>O<sub>30</sub> [M+H]<sup>+</sup> calculated 1568.7856.

IR (KBr) 2926, 2830, 1715, 1512, 1461, 1365, 1196, 1168, 1036 cm<sup>-1</sup>.

[α]<sub>D</sub><sup>25</sup> = +139.0° (c = 0.30, MeOH).

### **6<sup>l</sup>-Deoxy-6<sup>l</sup>-(4-(((*R*)-quinolin-4-yl(5-vinylquinuclidin-2-yl)methoxy)methyl)-1*H*-1,2,3-triazol-1-yl)-permethyl-α-CD (8b)**

The compound **8b** was prepared according to the general procedure (**GP2**) from 6<sup>l</sup>-azido-6<sup>l</sup>-deoxy-permethyl-α-CD (**6**, 100 mg, 0.08 mmol), 9-*O*-propargyl-cinchonidine (**3b**, 35 mg, 0.10 mmol) and copper iodide (3 mg, 0.02 mmol). The product was obtained as white-yellow solid (61 mg, 48% yield). TLC: *R*<sub>F</sub> = 0.40 (eluent B).

**<sup>1</sup>H NMR (MeOH-d<sub>4</sub>):** δ (ppm): 8.87 – 8.85 (m, 1H, H-2'), 8.33 – 8.29 (m, 1H, H-8'), 8.11 – 8.08 (m, 1H, H-5'), 7.97 (s, 1H, H-14'), 7.82 – 7.80 (m, 1H, H-6'), 7.73 – 7.70 (m, 1H, H-3'), 7.70 – 7.68 (m, 1H, H-7'), 5.80 – 5.75 (m, 1H, H-10'), 5.32 – 5.31 (m, 1H, H-1<sup>l</sup>), 5.07 – 4.97 (m, 5H, H-1), 4.97 – 4.95 (m, 1H, H-6a<sup>l</sup>), 4.93 – 4.90 (m, 2H, H-11'), 4.89 – 4.86 (m, 1H, H-6b<sup>l</sup>), 4.58 (bs, 2H, H-12'), 4.18 – 4.16 (m, 1H, H-5<sup>l</sup>), 4.02 – 3.96 (m, 5H, H-5), 3.98 – 3.85 (m, 10H, H-6), 3.65 – 3.59 (m, 18H, OCH<sub>3</sub>-3), 3.60 – 3.56 (m, 12H, H-3, H-4), 3.58 – 3.47 (m, 18H, OCH<sub>3</sub>-2), 3.41 – 3.40 (m, 1H, H-6a'), 3.36 – 3.27 (m, 15H, OCH<sub>3</sub>-6), 3.22 – 3.19 (m, 1H, H-8'), 3.07 – 3.05 (m, 1H, H-2a'), 3.10 – 2.99 (m, 6H, H-2), 2.66 – 2.64 (m, 1H, H-6b'), 2.59 – 2.56 (m, 1H, H-2b'), 2.35 – 2.33 (m, 1H, H-3'), 1.79 – 1.76 (m, 1H, H-4'), 1.67 – 1.62 (m, 1H, H-5a'), 1.60 – 1.54 (m, 1H, H-5b'), 1.37 – 1.33 (m, 1H, H-7a'), 1.28 – 1.24 (m, 1H, H-7b').

H-9'signal is not seen.

**<sup>13</sup>C NMR (MeOH-d<sub>4</sub>):** δ (ppm): 151.00 (C-2'), 149.21 (C-10''\*), 148.07 (C-4''\*), 145.07 (C-13'), 142.53 (C-10'), 131.00 (C-6'), 130.33 (C-5'), 128.46 (C-7'), 127.93 (C-9'), 127.43 (C-14'), 124.65 (C-8'), 120.54 (C-3'), 115.11 (C-11'), 100.27 (6 × C-1), 83.04 (6 × C-4, 6 × C-3, 6 × C-2), 81.30 (C-9'), 72.50 (5 × C-5, 5 × C-6), 71.69 (C-5<sup>l</sup>), 63.50 (C-12'), 62.03 (6 × OCH<sub>3</sub>-3), 59.57 (5 × OCH<sub>3</sub>-6), 58.90 (6 × OCH<sub>3</sub>-2), 61.73 (C-8'), 57.46 (C-2'), 52.45 (C-6<sup>l</sup>), 43.88 (C-6'), 40.81 (C-3'), 29.02 (C-4'), 28.25 (C-5'), 23.48 (C-7').

Signals tagged with \* can be mutually interchanged.

HRMS (ESI): found 1568.7708. For  $C_{75}H_{117}N_5O_{30}$  calculated  $[M+H]^+$  1568.7856.

IR (KBr) 2920, 2839, 1595, 1455, 1359, 1165, 1111, 1069, 1039  $cm^{-1}$ .

$[\alpha]_D^{25} = +75.0^\circ$  ( $c = 0.30$ , MeOH).

### **6<sup>l</sup>-Deoxy-6<sup>l</sup>-(4-(((*R*)-1-(6-methoxyquinolin-4-yl(5-vinylquinuclidin-2-yl)methoxy) methyl)-1*H*-1,2,3-triazol-1-yl)-permethyl- $\alpha$ -CD (8c)**

The compound **8c** was prepared according to the general procedure (**GP2**) from 6<sup>l</sup>-azido-6<sup>l</sup>-deoxy-permethyl- $\alpha$ -CD (**6**, 100 mg, 0.08 mmol), 9-*O*-propargyl-quinine (**3c**, 38 mg, 0.10 mmol) and copper iodide (4 mg, 0.02 mmol). The product was obtained as white-yellow solid (63 mg, 49% yield). TLC:  $R_F = 0.40$  (eluent B).

**<sup>1</sup>H NMR (MeOH-*d*<sub>4</sub>):**  $\delta$  (ppm): 8.71 – 8.70 (m, 1H, H-2'), 7.99 – 7.98 (m, 1H, H-8'), 7.98 (s, 1H, H-14'), 7.69 – 7.67 (m, 1H, H-3'), 7.53 – 7.50 (m, 1H, H-5'), 7.48 – 7.45 (m, 1H, H-7'), 5.81 – 5.74 (m, 1H, H-10'), 5.34 – 5.28 (m, 1H, H-1'), 5.00 – 4.88 (m, 5H, H-1), 4.97 – 4.92 (m, 2H, H-11'), 4.93 – 4.91 (m, 2H, H-6<sup>l</sup>), 4.59 (s, 2H, H-12'), 4.19 – 4.16 (m, 1H, H-5<sup>l</sup>), 3.99 (s, 3H, OCH<sub>3</sub>-6'), 3.92 – 3.81 (m, 5H, H-5) 3.82 – 3.25 (m, 10H, H-6), 3.67 – 3.60 (m, 18H, OCH<sub>3</sub>-3), 3.63 – 3.61 (m, 1H, H-8'), 3.55 – 3.53 (m, 1H, H-9'), 3.52 – 3.45 (m, 18H, OCH<sub>3</sub>-2), 3.61 – 3.41 (m, 12H, H-3, H-4), 3.37 – 3.25 (m, 15H, OCH<sub>3</sub>-6), 3.21 – 3.12 (m, 6H, H-2), 3.08 – 3.05 (m, 1H, H-2a'), 2.69 – 2.66 (m, 2H, H-6'), 2.61 – 2.59 (m, 1H, H-2b'), 2.38 – 2.33 (m, 1H, H-3'), 1.80 – 1.79 (m, 1H, H-4'), 1.77 – 1.75 (m, 1H, H-5a'), 1.58 – 1.56 (m, 1H, H-5b'), 1.33 – 1.28 (m, 2H, H-7').

**<sup>13</sup>C NMR (MeOH-*d*<sub>4</sub>):**  $\delta$  (ppm): 159.90 (C-6'), 148.22 (C-2'), 146.39 (C-10''), 145.18 (C-4''), 145.12 (C-13'), 142.60 (C-10'), 131.65 (C-8'), 128.98 (C-9'), 127.42 (C-14'), 123.63 (C-7'), 120.40 (C-3'), 102.55 (C-5'), 100.26 (6 × C-1), 83.10 (6 × C-2, 6 × C-3, 6 × C-4), 79.47 (C-9'), 72.42 (6 × C-5, 6 × C-6), 63.40 (C-12'), 62.07 (6 × OCH<sub>3</sub>-3), 61.16 (C-8'), 59.29 (6 × OCH<sub>3</sub>-2), 58.99 (5 × OCH<sub>3</sub>-6), 57.50 (C-2'), 56.56 (OCH<sub>3</sub>-6'), 52.44 (C-6<sup>l</sup>), 44.08 (C-6'), 40.84 (C-3'), 29.07 (C-4'), 28.32 (C-5'), 22.51 (C-7').

Signals tagged with \* can be mutually interchanged.

HRMS (ESI): found 1568.7849. For  $C_{76}H_{119}N_5O_{31}$   $[M+H]^+$  calculated 1598.7962.

IR (KBr) 2926, 2836, 1622, 1506, 1476, 1365, 1228, 1141, 1036  $cm^{-1}$ .

$[\alpha]_D^{25} = +92.4^\circ$  ( $c = 0.21$ , MeOH).

### **6<sup>I</sup>-Deoxy-6<sup>I</sup>-(4-(((S)-1-(6-methoxyquinolin-4-yl(5-vinylquinuclidin-2-yl)methoxy) methyl)-1*H*-1,2,3-triazol-1-yl)-permethyl- $\alpha$ -CD (8d)**

The compound **8d** was prepared according to the general procedure (**GP2**) from 6<sup>I</sup>-azido-6<sup>I</sup>-deoxy-permethyl- $\alpha$ -CD (**6**, 100 mg, 0.08 mmol), 9-*O*-propargyl-quinidine (**3d**, 38 mg, 0.10 mmol) and copper iodide (4 mg, 0.02 mmol). The product was obtained as white-yellow solid (54 mg, 42% yield). TLC:  $R_F$  = 0.40 (eluent B).

**<sup>1</sup>H NMR (MeOH-*d*<sub>4</sub>):**  $\delta$  (ppm): 8.71 – 8.70 (m, 1H, H-2''), 7.99 – 7.98 (m, 1H, H-8''), 7.96 (s, 1H, H-14'), 7.66 – 7.65 (m, 1H, H-3''), 7.51 – 7.50 (m, 1H, H-5''), 7.46 – 7.44 (m, 1H, H-7''), 6.00 – 5.97 (m, 1H, H-10'), 5.33 – 5.32 (m, 1H, H-1'), 5.08 – 5.00 (m, 5H, H-1), 5.05 – 5.03 (m, 2H, H-11'), 4.92 – 4.91 (m, 2H, H-6<sup>I</sup>), 4.60 – 4.58 (m, 1H, H-9'), 4.55 (s, 2H, H-12'), 4.20 – 4.16 (m, 1H, H-5<sup>I</sup>), 3.99 (s, 3H, OCH<sub>3</sub>-6''), 3.91 – 3.81 (m, 4H, H-5), 3.91 – 3.61 (m, 10H, H-6), 3.69 – 3.63 (m, 18H, OCH<sub>3</sub>-3), 3.65 – 3.21 (m, 12H, H-3, H-4), 3.49 – 3.41 (m, 18H, OCH<sub>3</sub>-2), 3.34 – 3.32 (m, 1H, H-2a'), 3.25 – 3.31 (m, 15H, OCH<sub>3</sub>-6), 3.12 – 3.10 (m, 1H, H-8'), 3.21 – 3.05 (m, 6H, H-2), 2.88 – 2.85 (m, 1H, H-2b'), 2.87 – 2.85 (m, 1H, H-6a'), 2.79 – 2.74 (m, 1H, H-6b'), 2.31 – 2.28 (m, 1H, H-3'), 2.11 – 2.08 (m, 1H, H-7a'), 1.72 – 1.70 (m, 1H, H-4'), 1.60 – 1.53 (m, 2H, H-5'), 1.32 – 1.24 (m, 1H, H-7b').

**<sup>13</sup>C NMR (MeOH-*d*<sub>4</sub>):**  $\delta$  (ppm): 159.82 (C-6''), 148.22 (C-2''), 146.37 (C-10''\*), 145.15 (C-4''\*), 145.05 (C-13'), 141.64 (C-10'), 131.60 (C-8''), 128.92 (C-9''), 127.46 (C-14'), 123.59 (C-7''), 120.54 (C-3''), 115.42 (C-11'), 102.59 (C-5''), 100.27 (6  $\times$  C-1), 83.08 (6  $\times$  C-2, 6  $\times$  C-3, 6  $\times$  C-4), 81.33 (C-9'), 72.33 (5  $\times$  C-5, 5  $\times$  C-6), 71.67 (C-5<sup>I</sup>), 63.44 (C-12'), 61.11 (6  $\times$  OCH<sub>3</sub>-3), 60.88 (C-8'), 59.80 (6  $\times$  OCH<sub>3</sub>-2), 58.52 (5  $\times$  OCH<sub>3</sub>-6), 56.45 (OCH<sub>3</sub>-6''), 52.41 (C-6<sup>I</sup>), 50.85 (C-6'), 50.24 (C-2'), 41.06 (C-3'), 29.50 (C-4'), 27.07 (C-5'), 22.66 (C-7').

Signals tagged with \* can be mutually interchanged.

HRMS (ESI): found 1598.7962. For C<sub>76</sub>H<sub>119</sub>N<sub>5</sub>O<sub>31</sub> [M+H]<sup>+</sup> calculated 1598.7859.

IR (KBr) 2929, 2839, 1622, 1512, 1456, 1368, 1257, 1144, 1039 cm<sup>-1</sup>.

$[\alpha]_D^{25}$  = +154.8° ( $c$  = 0.20, MeOH).

### **6<sup>I</sup>-Deoxy-6<sup>I</sup>-(4-(((S)-quinolin-4-yl(5-vinylquinuclidin-2-yl)methoxy) methyl)-1*H*-1,2,3-triazol-1-yl)-permethyl- $\beta$ -CD (9a)**

The compound **9a** was prepared according to the general procedure (**GP2**) from 6<sup>I</sup>-azido-6<sup>I</sup>-deoxy-permethyl- $\beta$ -CD (**7**, 100 mg, 0.07 mmol), 9-*O*-propargylcinchonine (**3a**, 29 mg, 0.09 mmol) and copper iodide (3 mg, 0.01 mmol). The product was obtained as white-yellow solid (38 mg, 64% yield). TLC:  $R_F$  = 0.38 (eluent B).

**<sup>1</sup>H NMR (MeOH-d<sub>4</sub>):** δ (ppm): 8.90 – 8.89 (m, 1H, H-2'), 8.32 – 8.29 (m, 1H, H-8'), 8.12 – 8.10 (m, 1H, H-5'), 7.94 (s, 1H, H-14'), 7.84 – 7.81 (m, 1H, H-6'), 7.72 – 7.69 (m, 1H, H-3'), 7.71 – 7.68 (m, 1H, H-7'), 6.05 – 5.99 (m, 1H, H-10'), 5.55 – 5.21 (m, 7H, H-1), 5.04 – 5.01 (m, 1H, H-6a<sup>l</sup>), 5.04 – 5.03 (m, 2H, H-11'), 4.80 – 4.79 (m, 1H, H-6b<sup>l</sup>), 4.57 (s, 2H, H-12'), 4.09 – 4.07 (m, 1H, H-5<sup>l</sup>), 3.88 – 3.50 (m, 18H, H-5, H-6), 3.65 – 3.41 (m, 14H, H-3, H-4), 3.65 – 3.59 (m, 21H, OCH<sub>3</sub>-3), 3.52 – 3.43 (m, 21H, OCH<sub>3</sub>-2), 3.36 – 3.25 (m, 18H, OCH<sub>3</sub>-6), 3.28 – 3.26 (m, 1H, H-2a'), 3.18 – 3.16 (m, 1H, H-8'), 3.19 – 3.10 (m, 7H, H-2), 2.86 – 2.84 (m, 1H, H-2b'), 2.84 – 2.81 (m, 1H, H-6a'), 2.74 – 2.73 (m, 1H, H-6b'), 2.33 – 2.29 (m, 1H, H-3'), 2.10 – 2.07 (m, 1H, H-7a'), 1.73 – 1.72 (m, 1H, H-4'), 1.58 – 1.54 (m, 2H, H-5'), 1.31 – 1.28 (m, 1H, H-7b').

H-9' signal is not seen.

**<sup>13</sup>C NMR (MeOH-d<sub>4</sub>):** δ (ppm): 150.99 (C-2'), 149.18 (C-10''\*), 148.04 (C-4''\*), 144.98 (C-13'), 141.59 (C-10'), 130.96 (C-6'), 130.29 (C-5'), 128.41 (C-7'), 127.91 (C-9'), 127.46 (C-14'), 124.62 (C-8'), 120.81 (C-3'), 115.45 (C-11'), 99.67 (7 × C-1), 83.65 (7 × C-4, 7 × C-2), 81.67 (C-9'), 81.03 (7 × C-3), 72.87 (6 × C-5, 6 × C-6), 71.81 (C-5<sup>l</sup>), 63.45 (C-12'), 62.14 (7 × OCH<sub>3</sub>-3), 61.38 (C-8'), 59.72 (6 × OCH<sub>3</sub>-6, 7 × OCH<sub>3</sub>-2), 52.33 (C-6'), 50.81 (C-6'), 50.10 (C-2'), 41.07 (C-3'), 29.45 (C-4'), 27.07 (C-5'), 23.34 (C-7').

Signals tagged with \* can be mutually interchanged.

HRMS (ESI): found 1772.8706. For C<sub>84</sub>H<sub>133</sub>N<sub>5</sub>O<sub>35</sub> [M+H]<sup>+</sup> calculated 1772.8716.

IR (KBr) 2923, 2833, 1679, 1458, 1368, 1195, 1162, 1108, 1033 cm<sup>-1</sup>.

[α]<sub>D</sub><sup>25</sup> = +152.9° (c = 0.43, MeOH).

### **6<sup>l</sup>-Deoxy-6<sup>l</sup>-(4-(((*R*)-quinolin-4-yl(5-vinylquinuclidin-2-yl)methoxy)methyl)-1*H*-1,2,3-triazol-1-yl)-permethyl-β-CD (9b)**

The compound **9b** was prepared according to the general procedure (**GP2**) from 6<sup>l</sup>-azido-6<sup>l</sup>-deoxy-permethyl-β-CD (**7**, 100 mg, 0.07 mmol), 9-*O*-propargylcinchonidine (**3b**, 29 mg, 0.09 mmol) and copper iodide (3 mg, 0.01 mmol). The product was obtained as white-yellow solid (85 mg, 69% yield). TLC: *R*<sub>F</sub> = 0.38 (eluent B).

**<sup>1</sup>H NMR (MeOH-d<sub>4</sub>):** δ (ppm): 8.88 – 8.86 (m, 1H, H-2'), 8.33 – 8.31 (m, 1H, H-8'), 8.12 – 8.10 (m, 1H, H-5'), 7.97 (s, 1H, H-14'), 7.83 – 7.80 (m, 1H, H-6'), 7.73 – 7.71 (m, 1H, H-3'), 7.71 – 7.69 (m, 1H, H-7'), 5.80 – 5.75 (m, 1H, H-10'), 5.37 – 5.36 (m, 1H, H-1'), 5.27 – 5.13 (m, 6H, H-1), 5.12 – 5.10 (m, 1H, H-6a<sup>l</sup>), 4.98 – 4.96 (m, 1H, H-11a'), 4.93 – 4.91 (m, 1H, H-11b'), 4.78 – 4.74 (m, 1H, H-6b<sup>l</sup>), 4.58 (s, 2H, H-12'), 4.09 – 4.06 (m, 1H, H-5<sup>l</sup>), 3.90 – 3.72 (m, 18H, H-5, H-6), 3.68 – 3.60 (m, 21H, OCH<sub>3</sub>-3), 3.59 – 3.40 (m, 13H, H-3, H-4), 3.52

– 3.45 (m, 21H, OCH<sub>3</sub>-2), 3.44 – 3.42 (m, 1H, H-6b'), 3.39 – 3.36 (m, 1H, H-4<sup>l</sup>), 3.39 – 3.24 (m, 18H, OCH<sub>3</sub>-6), 3.22 – 3.20 (m, 1H, H-8'), 3.20 – 3.07 (m, 7H, H-2), 3.07 – 3.05 (m, 1H, H-2a'), 2.71 – 2.67 (m, 1H, H-6a'), 2.61 – 2.58 (m, 1H, H-2b'), 2.36 – 2.33 (m, 1H, H-3'), 1.82 – 1.77 (m, 1H, H-4'), 1.80 – 1.77 (m, 1H, H-5a'), 1.60 – 1.59 (m, 1H, H-5b'), 1.32 – 1.29 (m, 2H, H-7').

H-9' and C-9' signals are not seen.

**<sup>13</sup>C NMR (MeOH-d<sub>4</sub>):** δ (ppm): 151.00 (C-2'), 149.22 (C-10''\*), 147.92 (C-4''\*), 145.08 (C-13'), 142.43 (C-10'), 131.00 (C-6'), 130.35 (C-5'), 128.48 (C-7'), 127.90 (C-9'), 127.38 (C-14'), 124.63 (C-8'), 120.67 (C-3'), 115.19 (C-11'), 99.38 (7 × C-1), 83.21 (7 × C-2, 7 × C-4), 80.37 (7 × C-3), 72.57 (6 × C-5, 6 × C-6), 71.85 (C-5<sup>l</sup>), 63.52 (C-12'), 61.88 (7 × OCH<sub>3</sub>-3), 61.71 (C-8'), 59.25 (6 × OCH<sub>3</sub>-6, 7 × OCH<sub>3</sub>-2), 57.43 (C-2'), 52.38 (C-6<sup>l</sup>), 43.91 (C-6'), 40.81 (C-3'), 29.02 (C-4'), 28.22 (C-5'), 23.46 (C-7').

Signals tagged with \* can be mutually interchanged.

HRMS (ESI): found 1772.8671. For C<sub>84</sub>H<sub>133</sub>N<sub>5</sub>O<sub>35</sub> [M+H]<sup>+</sup> calculated 1772.8716.

IR (KBr) 2944, 2836, 1679, 1455, 1329, 1201, 1159, 1105, 1033 cm<sup>-1</sup>.

[α]<sub>D</sub><sup>25</sup> = +96.9° (c = 0.18, MeOH).

### **6<sup>l</sup>-Deoxy-6<sup>l</sup>-(4-(((R)-1-(6-methoxyquinolin-4-yl(5-vinylquinuclidin-2-yl)methoxy) methyl)-1H-1,2,3-triazol-1-yl)-permethyl-β-CD (9c)**

The compound **9c** was prepared according to the general procedure (**GP2**) from 6<sup>l</sup>-azido-6<sup>l</sup>-deoxy-permethyl-β-CD (**7**, 100 mg, 0.07 mmol), 9-O-propargyl-quinine (**3c**, 32 mg, 0.09 mmol) and copper iodide (3 mg, 0.01 mmol). The product was obtained as white-yellow solid (60 mg, 48% yield). TLC: R<sub>F</sub> = 0.38 (eluent B).

**<sup>1</sup>H NMR (MeOH-d<sub>4</sub>):** δ (ppm): 8.72 – 8.71 (m, 1H, H-2'), 8.01 (s, 1H, H-14'), 8.00 – 7.99 (m, 1H, H-8'), 7.70 – 7.68 (m, 1H, H-3'), 7.56 – 7.54 (m, 1H, H-5'), 7.48 – 7.46 (m, 1H, H-7'), 5.82 – 5.78 (m, 1H, H-10'), 5.38 (m, 1H, H-1<sup>l</sup>), 5.28 – 5.10 (m, 6H, H-1), 5.12 – 5.10 (m, 1H, H-6a<sup>l</sup>), 5.00 – 4.99 (m, 1H, H-11a'), 4.97 – 4.94 (m, 1H, H-11b'), 4.84 – 4.80 (m, 1H, H-6b<sup>l</sup>), 4.65 – 4.60 (m, 2H, H-12'), 4.10 – 4.07 (m, 1H, H-5<sup>l</sup>), 4.02 (s, 3H, OCH<sub>3</sub>-6'), 4.01 – 3.21 (m, 18H, H-5, H-6), 3.65 – 3.58 (m, 21H, OCH<sub>3</sub>-3), 3.55 – 3.45 (m, 21H, OCH<sub>3</sub>-2), 3.35 – 3.25 (m, 18H, OCH<sub>3</sub>-6), 3.64 – 3.62 (m, 1H, H-8'), 3.18 – 3.16 (m, 1H, H-2a'), 3.65 – 3.25 (m, 14H, H-3, H-4), 3.25 – 3.07 (m, 7H, H-2), 2.82 – 2.80 (m, 2H, H-6'), 2.73 – 2.70 (m, 1H, H-2b'), 2.43 – 2.40 (m, 1H, H-3'), 1.86 – 1.85 (m, 1H, H-4'), 1.83 – 1.80 (m, 1H, H-5a'), 1.67 – 1.60 (m, 1H, H-5b'), 1.39 – 1.24 (m, 2H, H-7').

H-9' signal is not seen.

**<sup>13</sup>C NMR (MeOH-d<sub>4</sub>):** δ (ppm): 160.00 (C-6''), 148.23 (C-2''), 145.86 (C-10''), 145.20 (C-4''), 144.98 (C-13'), 142.08 (C-10'), 131.66 (C-8'), 128.89 (C-9'), 127.45 (C-14'), 123.75 (C-7'), 120.30 (C-3'), 115.40 (C-11'), 102.52 (C-5'), 99.38 (7 × C-1), 83.69 (7 × C-2, 7 × C-3, 7 × C-4), 80.05 (C-9'), 72.62 (6 × C-5, 6 × C-6), 71.89 (C-5<sup>l</sup>), 63.37 (C-12'), 61.84 (7 × OCH<sub>3</sub>-3), 61.14 (C-8'), 59.10 (7 × OCH<sub>3</sub>-2, 7 × OCH<sub>3</sub>-6), 57.20 (C-2'), 56.77 (OCH<sub>3</sub>-6'), 52.38 (C-6<sup>l</sup>), 44.31 (C-6'), 40.49 (C-3'), 28.97 (C-4'), 27.90 (C-5'), 23.11 (C-7').

Signals tagged with \* can be mutually interchanged.

HRMS (ESI): found 1802.8819. For C<sub>85</sub>H<sub>135</sub>N<sub>5</sub>O<sub>36</sub> calculated [M+H]<sup>+</sup> 1802.8960.

IR (KBr) 2932, 2830, 1715, 1626, 1512, 1467, 1365, 1144, 1036 cm<sup>-1</sup>.

[α]<sub>D</sub> = +105.9° (c = 0.25, MeOH).

### **6<sup>l</sup>-Deoxy-6<sup>l</sup>-(4-(((S)-1-(6-methoxyquinolin-4-yl(5-vinylquinuclidin-2-yl)methoxy) methyl)-1*H*-1,2,3-triazol-1-yl)-permethyl-β-CD (9d)**

The compound **9d** was prepared according to the general procedure (**GP2**) from 6<sup>l</sup>-azido-6<sup>l</sup>-deoxy-permethyl-β-CD (**7**, 100 mg, 0.07 mmol), 9-*O*-propargylquinidine (**3d**, 32 mg, 0.09 mmol) and copper iodide (3 mg, 0.01 mmol). The product was obtained as white-yellow solid (78 mg, 63% yield). TLC: *R*<sub>F</sub> = 0.38 (eluent B).

**<sup>1</sup>H NMR (MeOH-d<sub>4</sub>):** δ (ppm): 8.74 – 8.72 (m, 1H, H-2''), 8.00 – 7.99 (m, 1H, H-8'), 7.97 (s, 1H, H-14'), 7.69 – 7.66 (m, 1H, H-3'), 7.54 – 7.50 (m, 1H, H-5'), 7.49 – 7.46 (m, 1H, H-7'), 6.03 – 5.97 (m, 1H, H-10'), 5.39 – 5.37 (m, 1H, H-1<sup>l</sup>), 5.25 – 5.10 (m, 6H, H-1), 5.06 – 5.04 (m, 1H, H-6a<sup>l</sup>), 5.03 – 5.01 (m, 2H, H-11'), 4.85 – 4.83 (m, 1H, H-6b<sup>l</sup>), 4.59 (s, 2H, H-12'), 4.15 – 4.11 (m, 1H, H-5<sup>l</sup>), 3.99 (s, 3H, OCH<sub>3</sub>-6'), 3.90 – 3.35 (m, 18H, H-5, H-6), 3.67 – 3.53 (m, 21H, OCH<sub>3</sub>-3), 3.58 – 3.48 (m, 21H, OCH<sub>3</sub>-2), 3.62 – 3.45 (m, 14H, H-3, H-4), 3.45 – 3.27 (m, 18H, OCH<sub>3</sub>-6), 3.23 – 3.05 (m, 7H, H-2), 3.13 – 3.11 (m, 1H, H-8'), 2.89 – 2.87 (m, 2H, H-6'), 2.86 – 2.84 (m, 1H, H-2a'), 2.77 – 2.75 (m, 1H, H-2b'), 2.34 – 2.31 (m, 1H, H-3'), 2.16 – 2.12 (m, 1H, H-7a'), 1.74 – 1.72 (m, 1H, H-4'), 1.62 – 1.54 (m, 2H, H-5'), 1.35 – 1.27 (m, 1H, H-7b').

H-9' signal is not seen.

**<sup>13</sup>C NMR (MeOH-d<sub>4</sub>):** δ (ppm): 159.82 (C-6''), 148.44 (C-2''), 146.45 (C-10''), 145.14 (C-4''), 145.06 (C-13'), 141.69 (C-10'), 131.59 (C-8'), 128.94 (C-9'), 127.42 (C-14'), 123.61 (C-7'), 120.66 (C-3'), 115.39 (C-11'), 102.56 (C-5'), 99.39 (7 × C-1), 81.52 (C-9'), 83.47 (7 × C-2, 7 × C-3, 7 × C-4), 72.51 (6 × C-5, 6 × C-6), 71.80 (C-5<sup>l</sup>), 63.41 (C-12'), 61.91 (7 × OCH<sub>3</sub>-3), 60.89 (C-8'), 59.25 (7 × OCH<sub>3</sub>-2, 6 × OCH<sub>3</sub>-6), 56.46 (OCH<sub>3</sub>-6'), 52.33 (C-6<sup>l</sup>), 50.85 (C-2'), 50.26 (C-6'), 41.12 (C-3'), 29.50 (C-4'), 27.12 (C-5'), 23.67 (C-7').

Signals tagged with \* can be mutually interchanged.

HRMS (ESI): found 1802.8839. For  $C_{85}H_{135}N_5O_{36}$   $[M+H]^+$  calculated 1802.8960.

IR (KBr) 2929, 2836, 1619, 1461, 1365, 1228, 1135, 1072, 1042  $cm^{-1}$ .

$[\alpha]_D^{25} = +146.9^\circ$  ( $c = 0.48$ , MeOH).

## Preparation of disubstituted $\alpha$ -CD derivatives

### **6<sup>I,IV</sup>-Dideoxy-6<sup>I,IV</sup>-bis((4-(((S)-(6-methoxyquinolin-4-yl)(5-vinylquinuclidin-2-yl)methoxy)methyl)-1*H*-1,2,3-triazol-1-yl)- $\alpha$ -CD (11)**

The starting material 6<sup>I,IV</sup>-diazido-6<sup>I,IV</sup>-dideoxy- $\alpha$ -CD (**10**, 25 mg, 0.025 mmol), prepared according to a combination of the published procedures [5,6], was dissolved in (10 min-sonicated under Ar atmosphere) H<sub>2</sub>O (0.2 mL). Then, 9-O-propargyl-quinine (**3c**, 12 mg, 0.03 mmol) was dissolved in (10 min-sonicated under Ar atmosphere) THF (0.2 mL) and added to the CD derivative. Copper iodide (0.013 mmol), suspended in (10 min-sonicated under Ar atmosphere) H<sub>2</sub>O (0.1 mL), was added and the reaction mixture was stirred at 50 °C for 16 h. The conversion to product was monitored by TLC in eluent A. After full conversion to product, the reaction mixture was slowly added to stirring acetone (75 mL) resulting in white-yellow precipitate. The solid was recovered by filtration, washed with acetone (3  $\times$  20 mL) and dried to constant weight in a vacuum drying box in the presence of P<sub>2</sub>O<sub>5</sub> and KOH. The crude product was purified by column chromatography (50 g of silica gel) with ACN/H<sub>2</sub>O/NH<sub>3</sub> 12:5:1 as mobile phase. Eye-visible blue precipitation at the top of the column was observed as copper cations interact with ammonia. The purified product was dried at 50 °C in high vacuum and obtained as white-yellow product (33 mg, 76% yield). TLC:  $R_F = 0.60$  (eluent A).

**<sup>1</sup>H NMR (DMSO-*d*<sub>6</sub>):**  $\delta$  (ppm): 8.75 – 8.73 (m, 2H, H-2'), 8.22 (s, 2H, H-14'), 7.94 – 7.95 (m, 2H, H-8'), 7.83 – 7.81 (m, 2H, H-3'), 7.65 – 7.63 (m, 2H, H-5'), 7.43 – 7.41 (m, 2H, H-7'), 5.78 – 5.76 (m, 2H, H-10'), 5.62 – 5.36 (m, 12H, OH-2, OH-3), 5.01 – 4.99 (m, 2H, H-11a'), 4.94 – 4.92 (m, 2H, H-11b'), 4.87 – 4.85 (m, 2H, H-6a<sup>I,IV</sup>), 4.80 – 4.72 (m, 6H, H-1), 4.78 – 4.76 (m, 2H, H-6b<sup>I,IV</sup>), 4.58 – 4.44 (m, 4H, OH-6), 4.52 – 4.50 (m, 2H, H-12a'), 4.40 – 4.38 (m, 2H, H-12b'), 4.00 – 3.98 (m, 2H, H-5<sup>I,IV</sup>), 3.95 (s, 6H, OCH<sub>3</sub>-6'), 3.88 – 3.21 (m, 33H, H-2, H-3, H-4, H-5, H-6), 3.38 – 3.39 (m, 2H, 8'), 2.44 – 2.42 (m, 2H, H-3'), 1.80 – 1.78 (m, 2H, H-4').

H-2', H-6', H-5', H-7', H-9', C-5', C-7', C-9' signals are not fully seen.

**<sup>13</sup>C NMR (DMSO-*d*<sub>6</sub>):** δ (ppm): 157.56 (2 × C-6''), 147.44 (2 × C-2''), 144.20 (2 × C-4''\*), 144.02 (2 × C-10''\*), 142.94 (2 × C-13'), 140.35 (2 × C-10'), 131.21 (2 × C-8'), 126.95 (2 × C-9'), 125.50 (2 × C-14'), 121.76 (2 × C-7''), 118.77 (2 × C-3'), 115.22 (2 × C-11'), 102.18 (2 × C-5'), 101.90 (6 × C-1), 83.06 (6 × C-4), 71.52 (6 × C-2, 6 × C-3, 4 × C-5), 69.07 (2 × C-5<sup>I,IV</sup>), 61.93 (2 × C-12'), 61.58 (4 × C-6), 59.02 (2 × C-8'), 56.18 (2 × OCH<sub>3</sub>-6''), 54.10 (2 × C-2'), 50.46 (2 × C-6<sup>I,IV</sup>), 42.65 (2 × C-6'), 37.79 (2 × C-3'), 26.73 (2 × C-4').

Signals tagged with \* can be mutually interchanged.

HRMS (ESI): found 874.3652. For C<sub>82</sub>H<sub>110</sub>N<sub>10</sub>O<sub>32</sub> calculated [M+2H]<sup>2+</sup> 874.3717.

IR (KBr) 3183, 3120, 2935, 1710, 1650, 1401, 1258, 1111, 1048 cm<sup>-1</sup>.

[α]<sub>D</sub><sup>25</sup> = +40.7° (c = 0.17, DMSO).

## Catalytic activity of CD derivatives

### Decarboxylative asymmetric allylic amination (AAA)

The starting material, MBH carbamate **12**, prepared according to the published procedure [7], was dissolved in ACN/H<sub>2</sub>O (for CD catalysts **4a–d**, **5a–d** and **11**) or toluene (for CD catalysts **8a–d**, **9a–d**) to achieve a 0.4 M solution. Then, CD catalysts (**4a–d**, **5a–d**, **11**, **8a–d**, **9a–d**) were added and the mixture stirred at 40 °C for 168 h. Conversion to product was monitored by TLC in hexane/EtOAc 6:1. The reaction mixture was evaporated and the crude product purified by column chromatography (hexane/EtOAc 10:1). NMR and MS spectra of product **9** are in accordance with the literature [7]. Enantiomeric excess was measured on an IB column (heptane/propan-2-ol 99:1), flow 1 mL/min, λ = 205 nm, T = 25 °C). Retention times of products: *t*<sub>R</sub> = 9.0–10.5 min (major enantiomer), *t*<sub>R</sub> = 9.5–11.2 min (minor enantiomer).

*Starting material: Methyl 2-(phenyl((phenylcarbamoyl)oxy)methyl)acrylate (12)*

**<sup>1</sup>H NMR (CDCl<sub>3</sub>):** δ (ppm): 7.46 – 7.24 (m, 9H), 7.06 (t, *J* = 7.4 Hz, 1H), 6.80 (s, 1H), 6.71 (s, 1H), 6.44 (s, 1H), 5.91 (s, 1H), 3.72 (s, 3H).

Spectra are in accordance with the literature [7].

**MS (ESI):** found: 334.1. For C<sub>18</sub>H<sub>17</sub>NO<sub>4</sub> calculated [M+Na]<sup>+</sup> 334.1.

**Product:** Methyl (*R*)-2-(phenyl(phenylamino)methyl)acrylate (**13**)

**<sup>1</sup>H NMR (CDCl<sub>3</sub>):** δ (ppm): 7.41 – 7.27 (m, 5H), 7.22 – 7.10 (m, 2H), 6.77 (t, *J* = 7.3 Hz, H), 6.64 (d, *J* = 7.8 Hz, 2H), 6.41 (s, 1H), 6.03 (s, 1H), 5.43 (s, 1H), 4.17 (bs, 1H) 3.71 (s, 3H).

Spectra are in accordance with the literature [8].

**MS (ESI):** found 290.1. For C<sub>17</sub>H<sub>17</sub>NO<sub>2</sub> calculated [M+Na]<sup>+</sup> 290.1.

## References

- (1) Kacprzak, K. M. Chemistry and Biology of Cinchona Alkaloids. In *Natural Products*; Ramawat, K. G., Mérillon, J.-M., Eds.; Springer Berlin Heidelberg: Berlin, Heidelberg, 2013; pp 605–641.
- (2) Tang, W.; Ng, S.-C. *Nat. Protoc.* **2008**, 3 (4), 691–697.
- (3) Bauer, M.; Fajolles, C.; Charitat, T.; Wacklin, H.; Daillant, J. *J. Phys. Chem. B* **2011**, 115 (51), 15263–15270.
- (4) Al Temimi, A. H. K.; Boltje, T. J.; Zollinger, D.; Rutjes, F. P. J. T.; Feiters, M. C. *Bioconjug. Chem.* **2017**, 28 (8), 2160–2166.
- (5) Guieu, S.; Sollogoub, M. *J. Org. Chem.* **2008**, 73 (7), 2819–2828.
- (6) Kumprecht, L.; Buděšínský, M.; Vondrášek, J.; Vymětal, J.; Černý, J.; Císařová, I.; Brynda, J.; Herzig, V.; Koutník, P.; Závada, J.; et al. *J. Org. Chem.* **2009**, 74 (3), 1082–1092.
- (7) Dočekal, V.; Šimek, M.; Dračínský, M.; Veselý, J. *Chem. - Eur. J.* **2018**, 24 (51), 13441–13445.
- (8) Liu, K.; Han, X.; Wang, Z.; Wang, K.; Ding, J. *J. Am. Chem. Soc.* **2015**, 137, 15346–15349.

# $^1\text{H}$ and $^{13}\text{C}$ NMR spectra of prepared CD derivatives

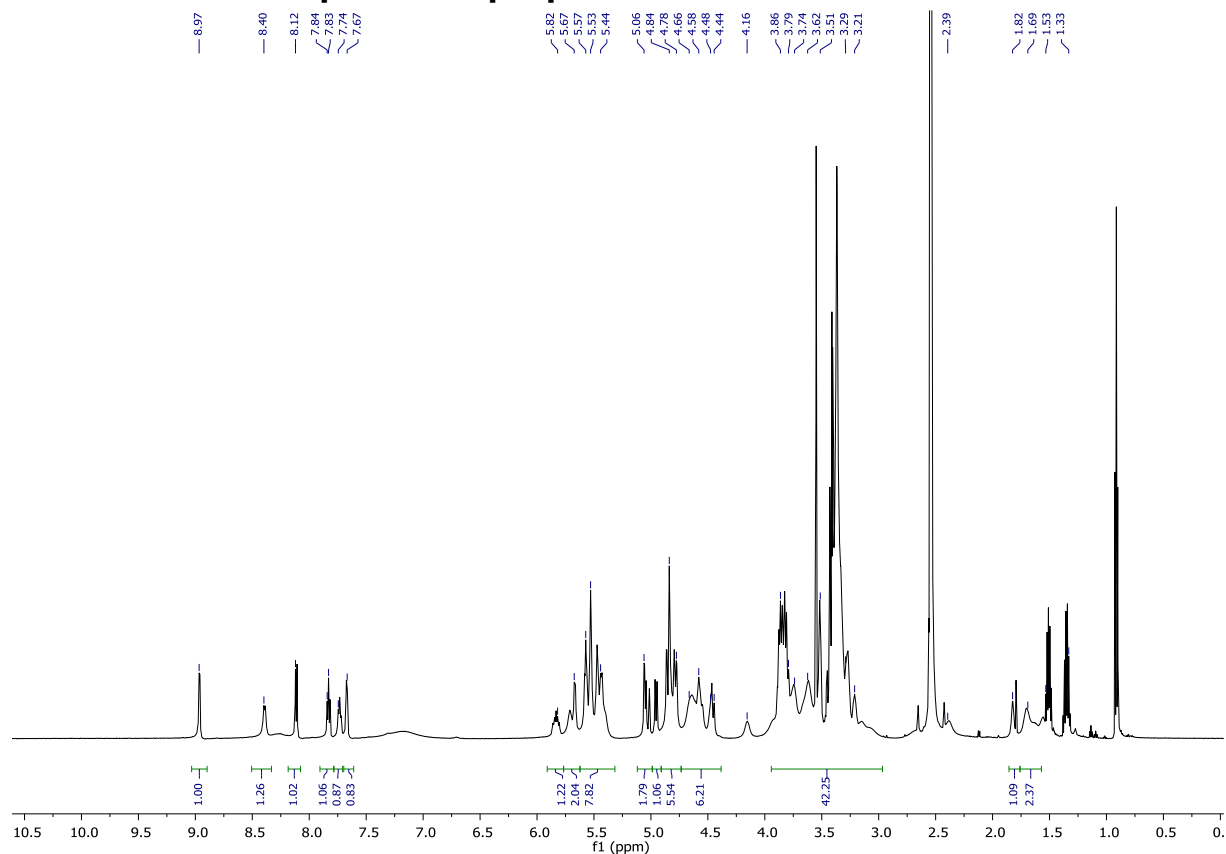

Figure S2:  $^1\text{H}$  NMR spectrum of compound 4a.

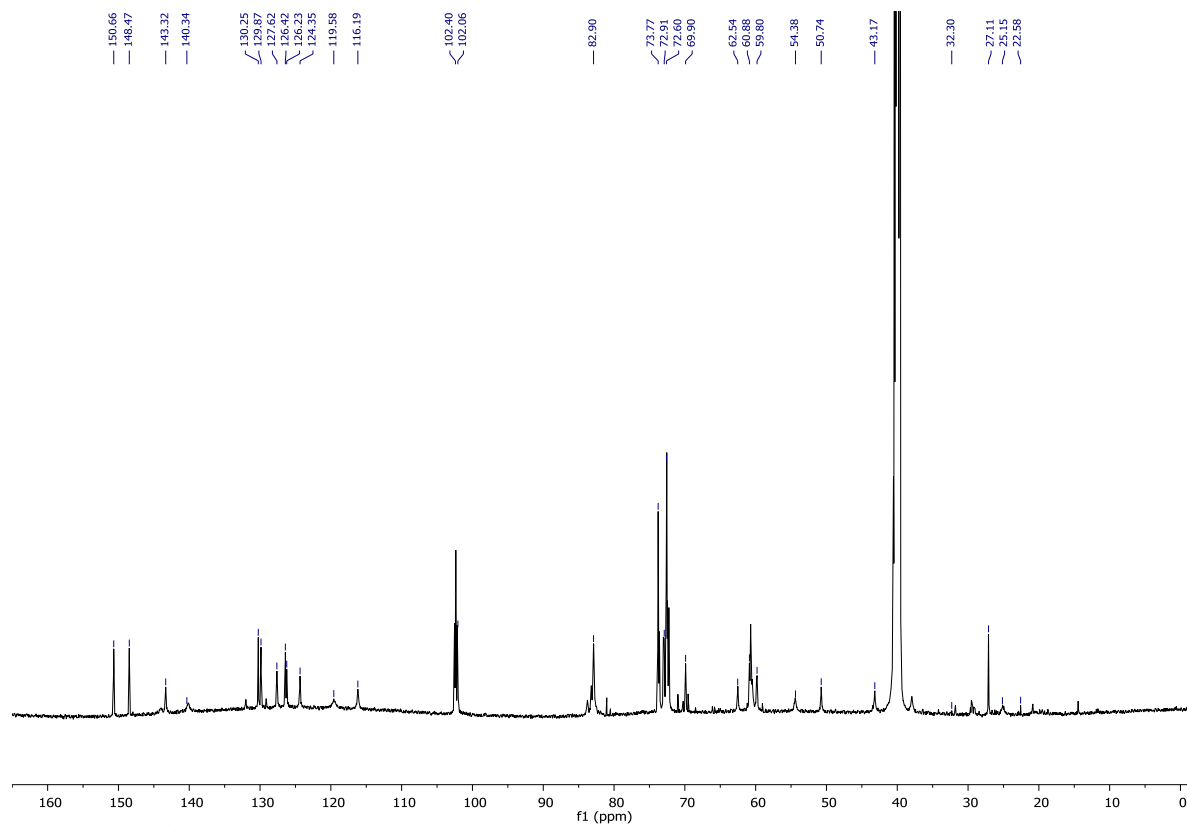

Figure S3:  $^{13}\text{C}$  NMR spectrum of compound 4a.

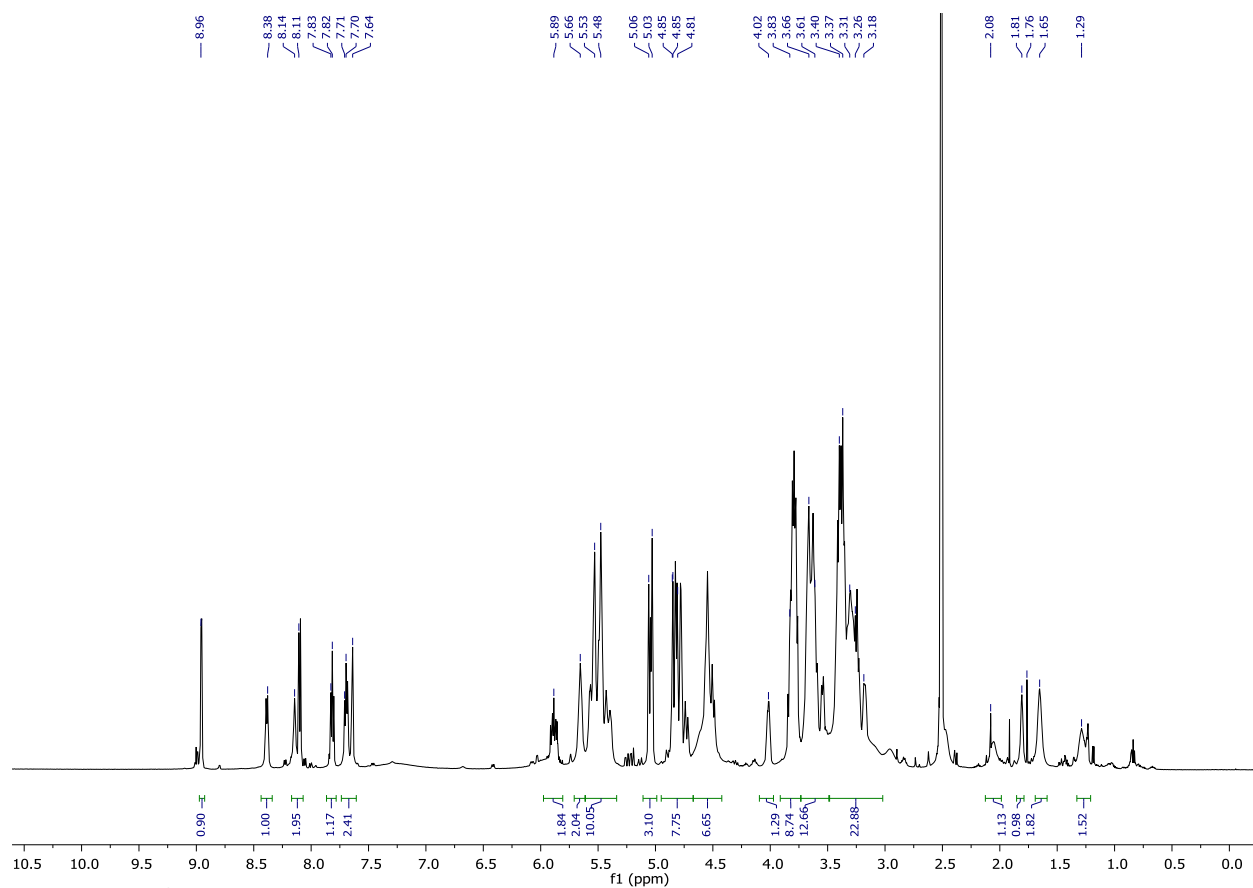

**Figure S4:  $^1\text{H}$  NMR spectrum of compound 4b.**

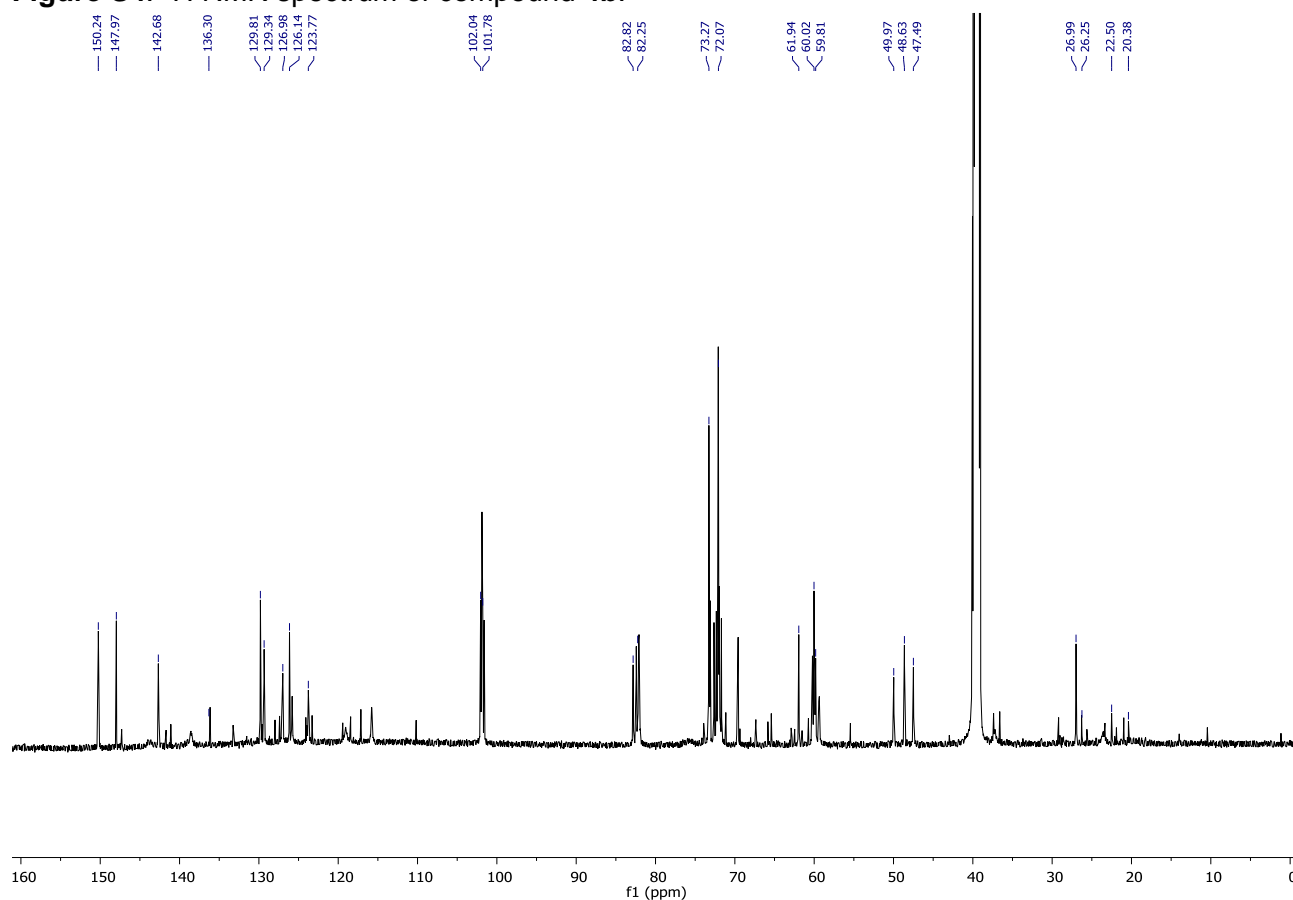

**Figure S5:  $^{13}\text{C}$  NMR spectrum of compound 4b.**

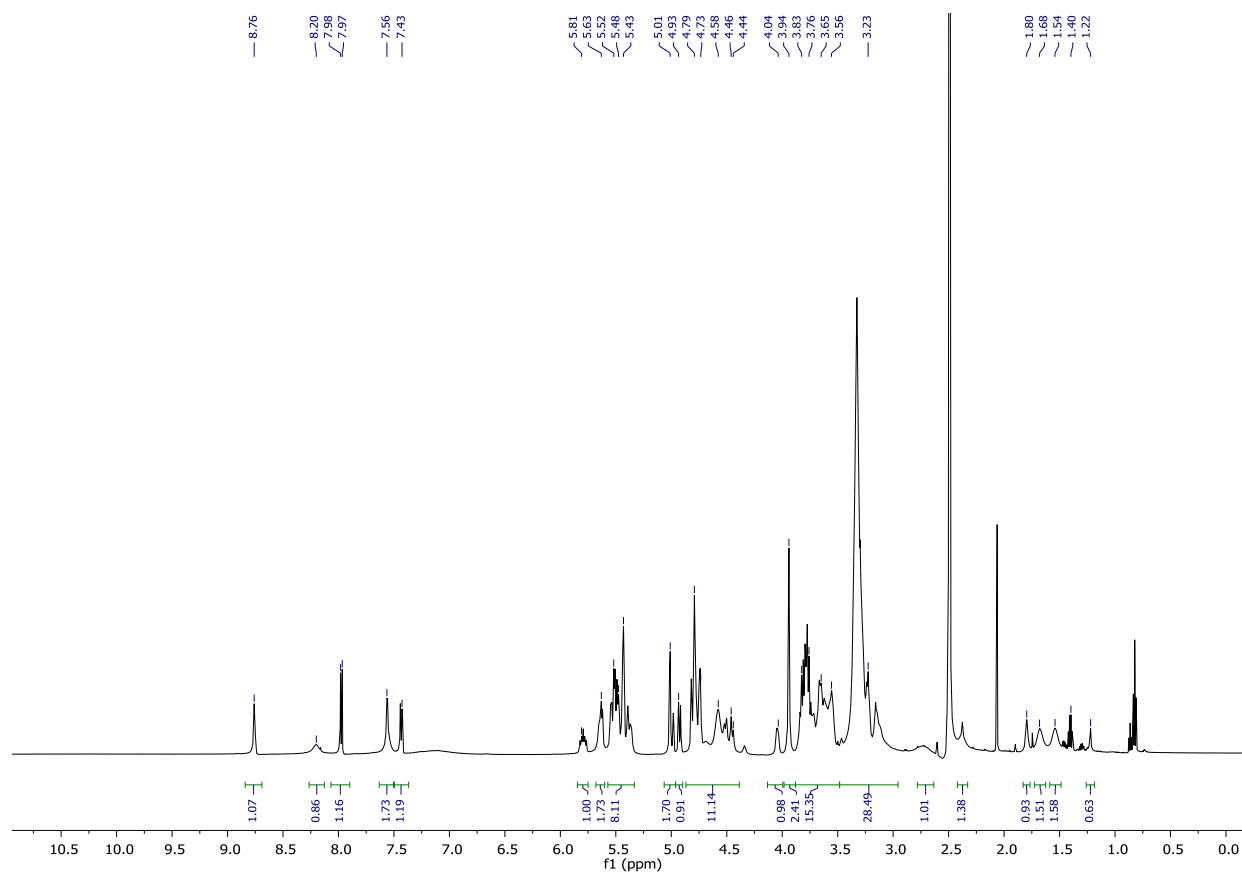

**Figure S6:  $^1\text{H}$  NMR spectrum of compound 4c.**

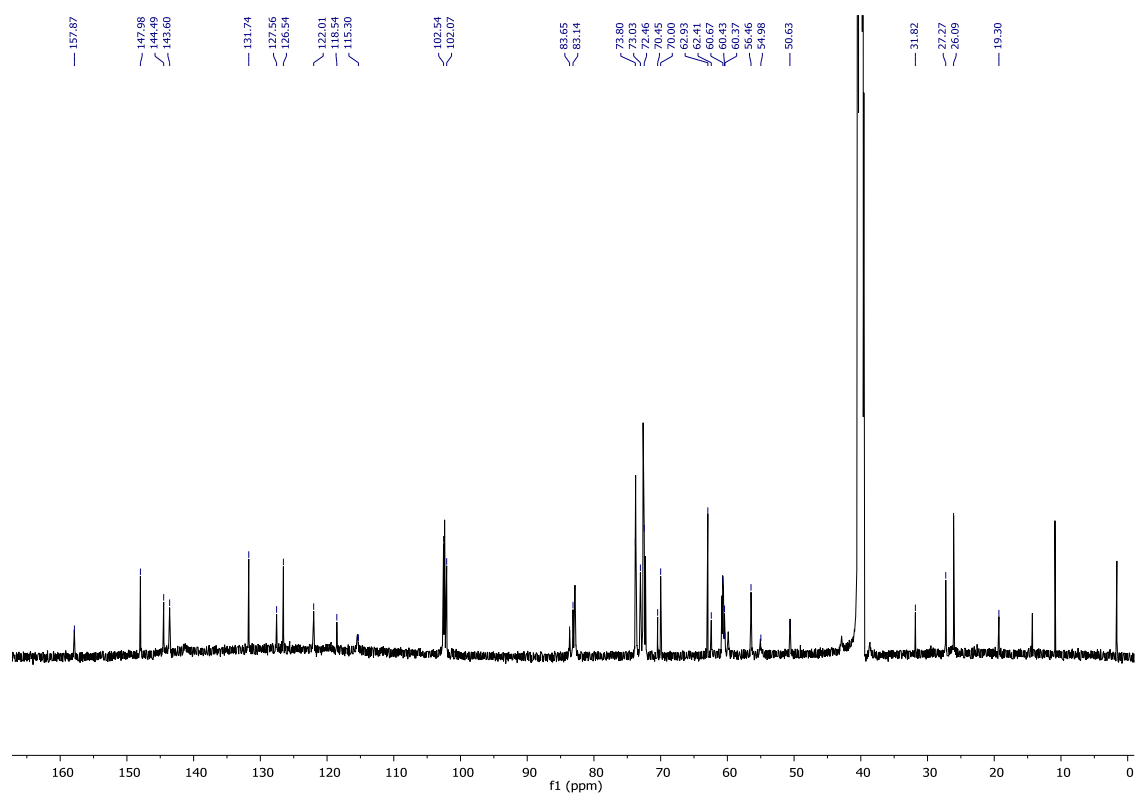

**Figure S7:  $^{13}\text{C}$  NMR spectrum of compound 4c.**

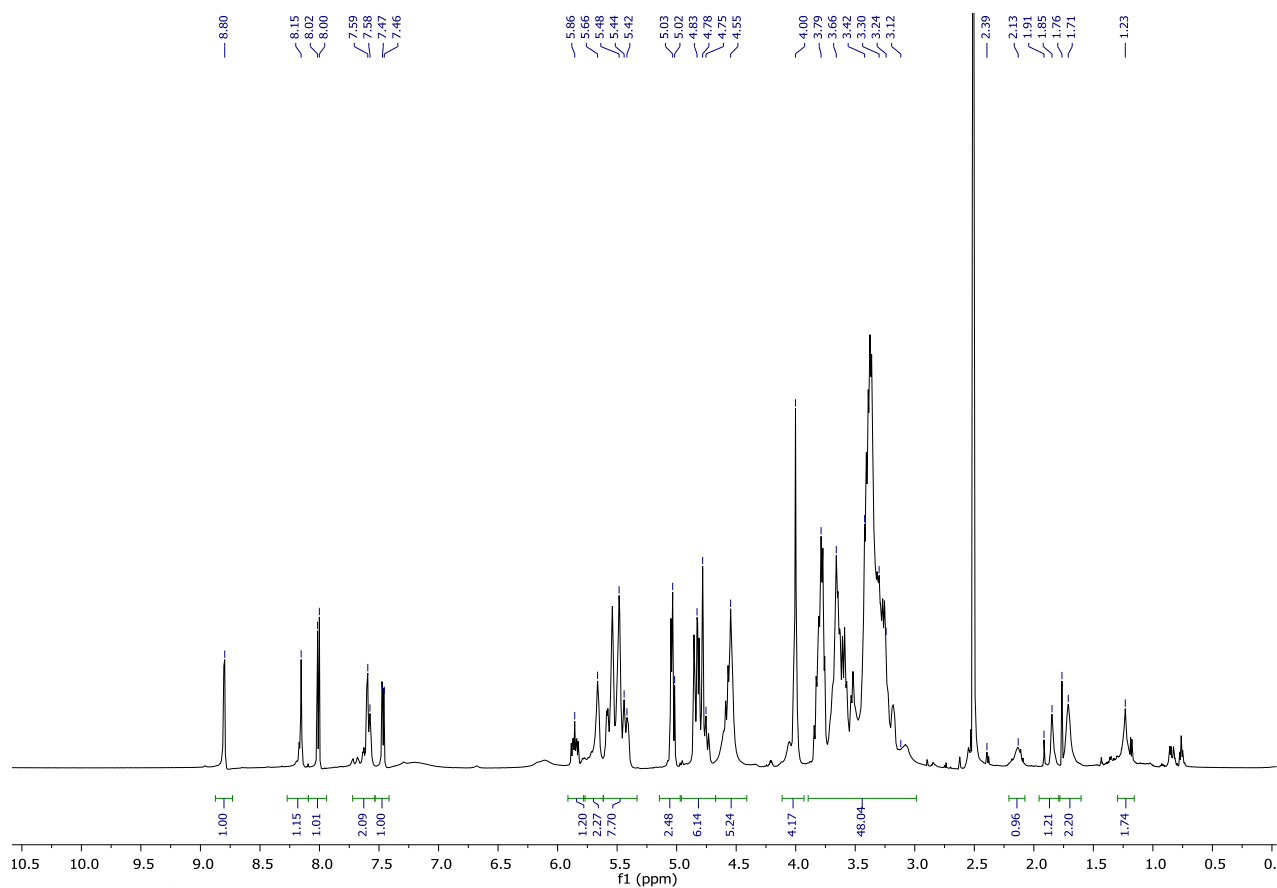

**Figure S8:  $^1\text{H}$  NMR spectrum of compound 4d.**

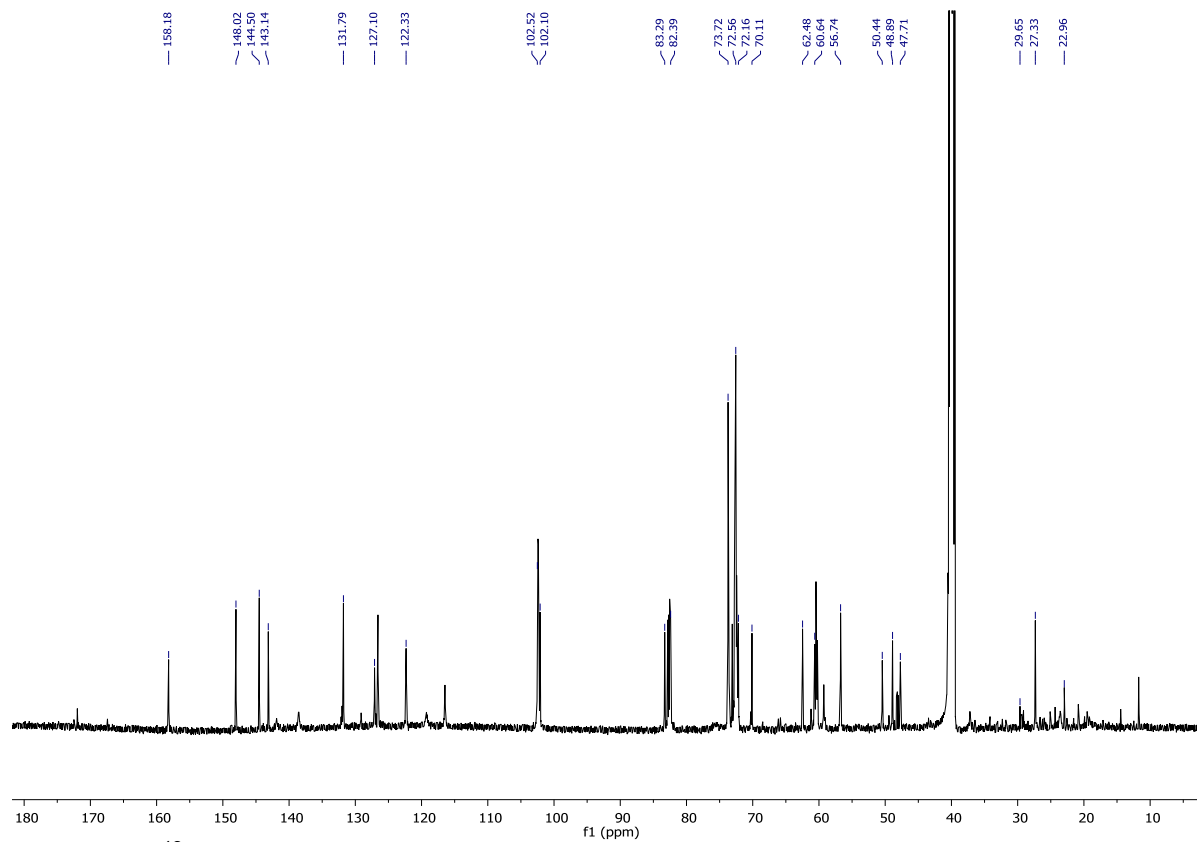

**Figure S9:  $^{13}\text{C}$  NMR spectrum of compound 4d.**

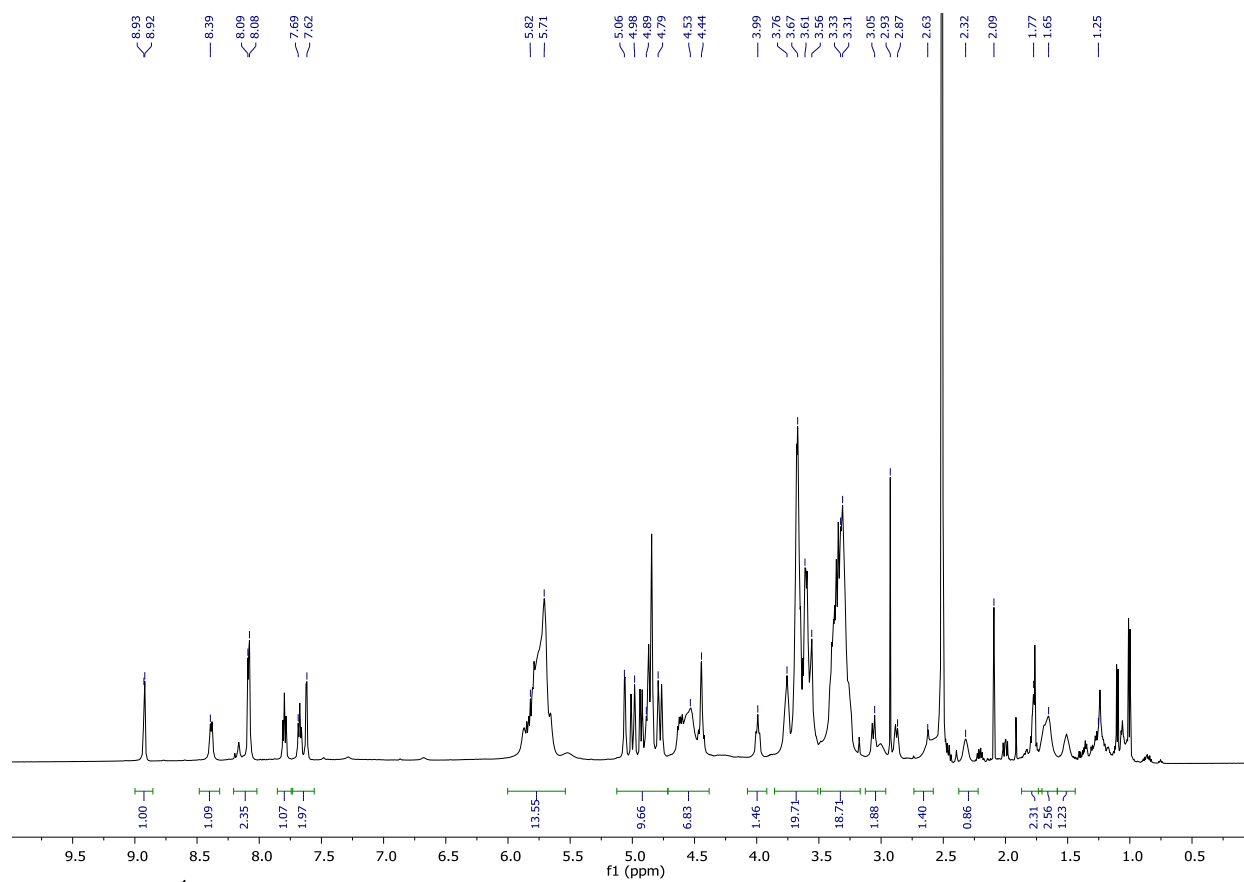

**Figure S10:**  $^1\text{H}$  NMR spectrum of compound **5a**.

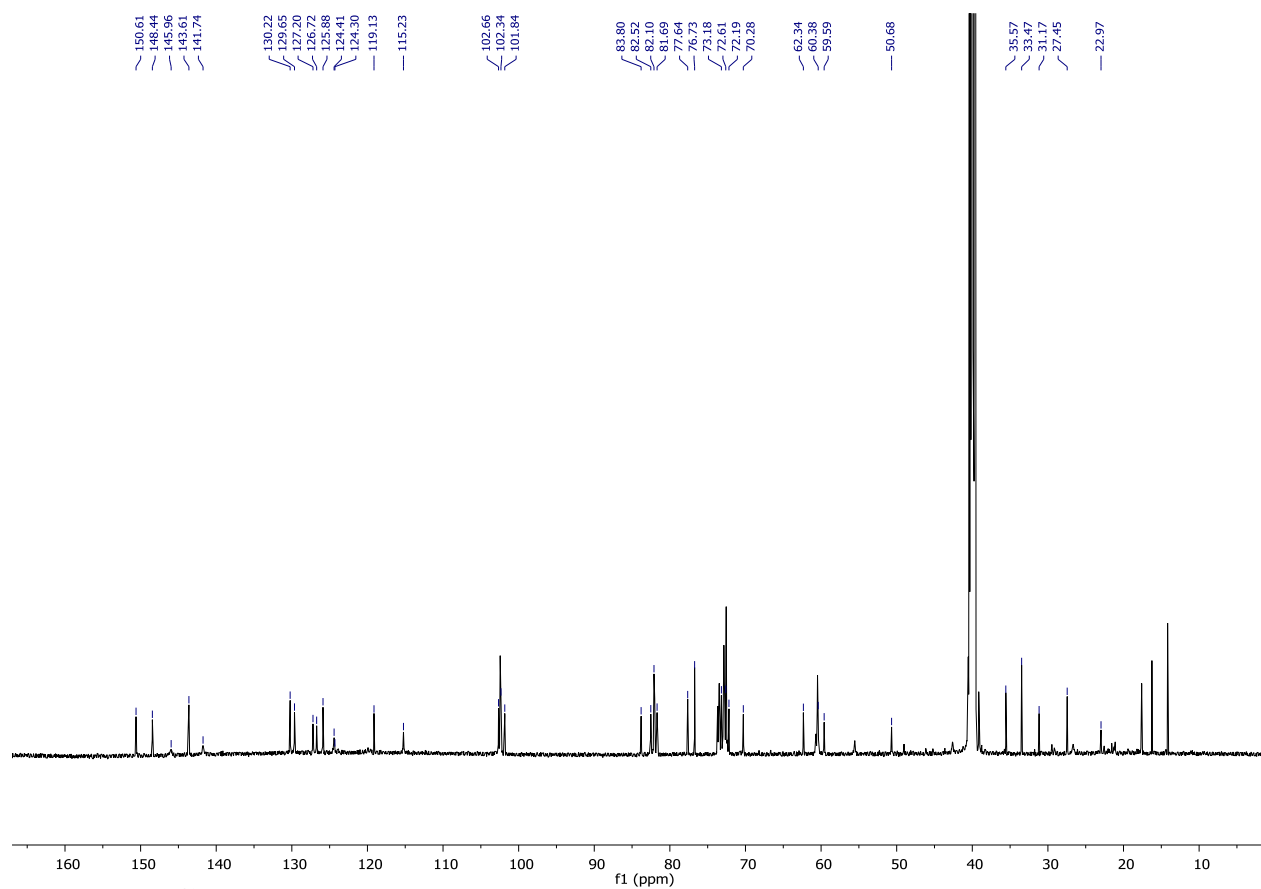

**Figure S11:**  $^{13}\text{C}$  NMR spectrum of compound **5a**.

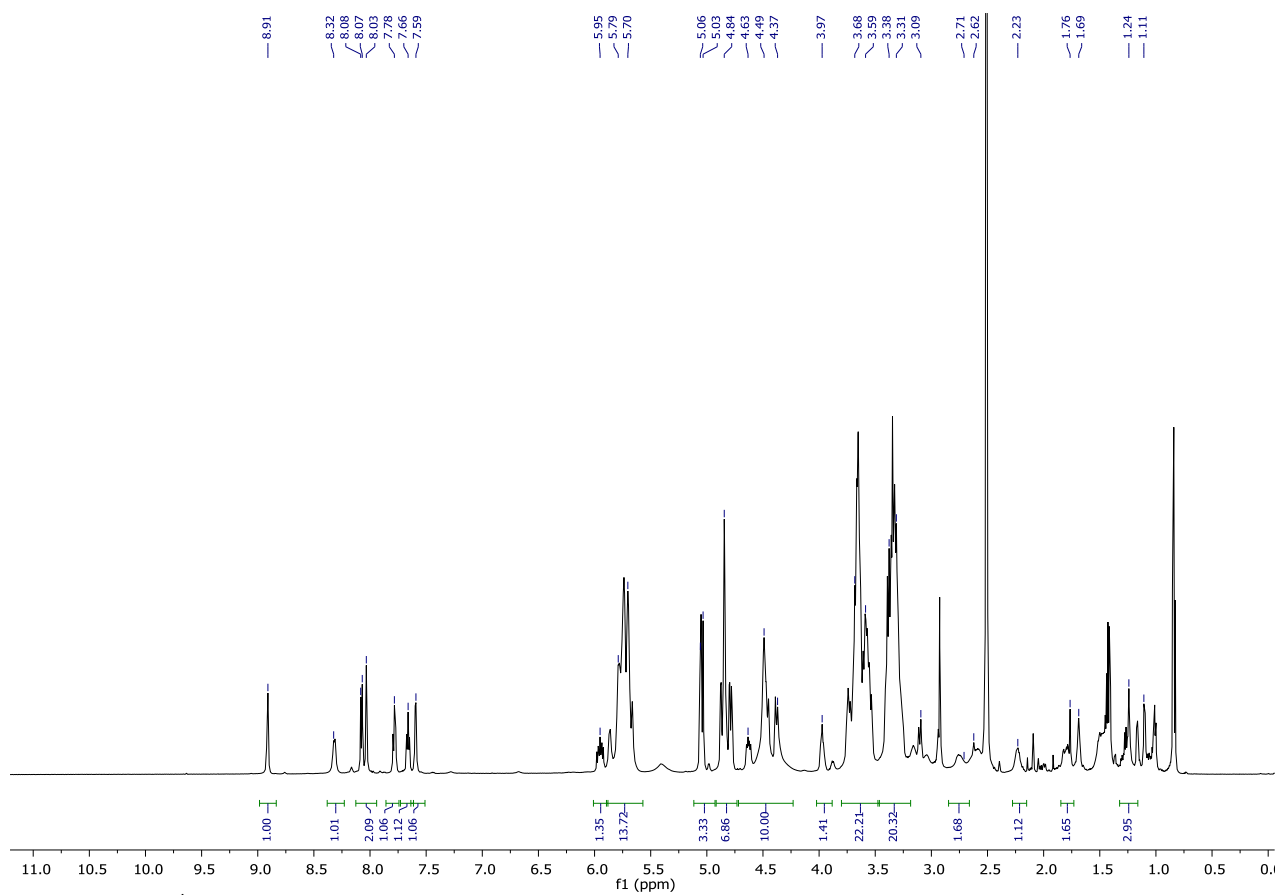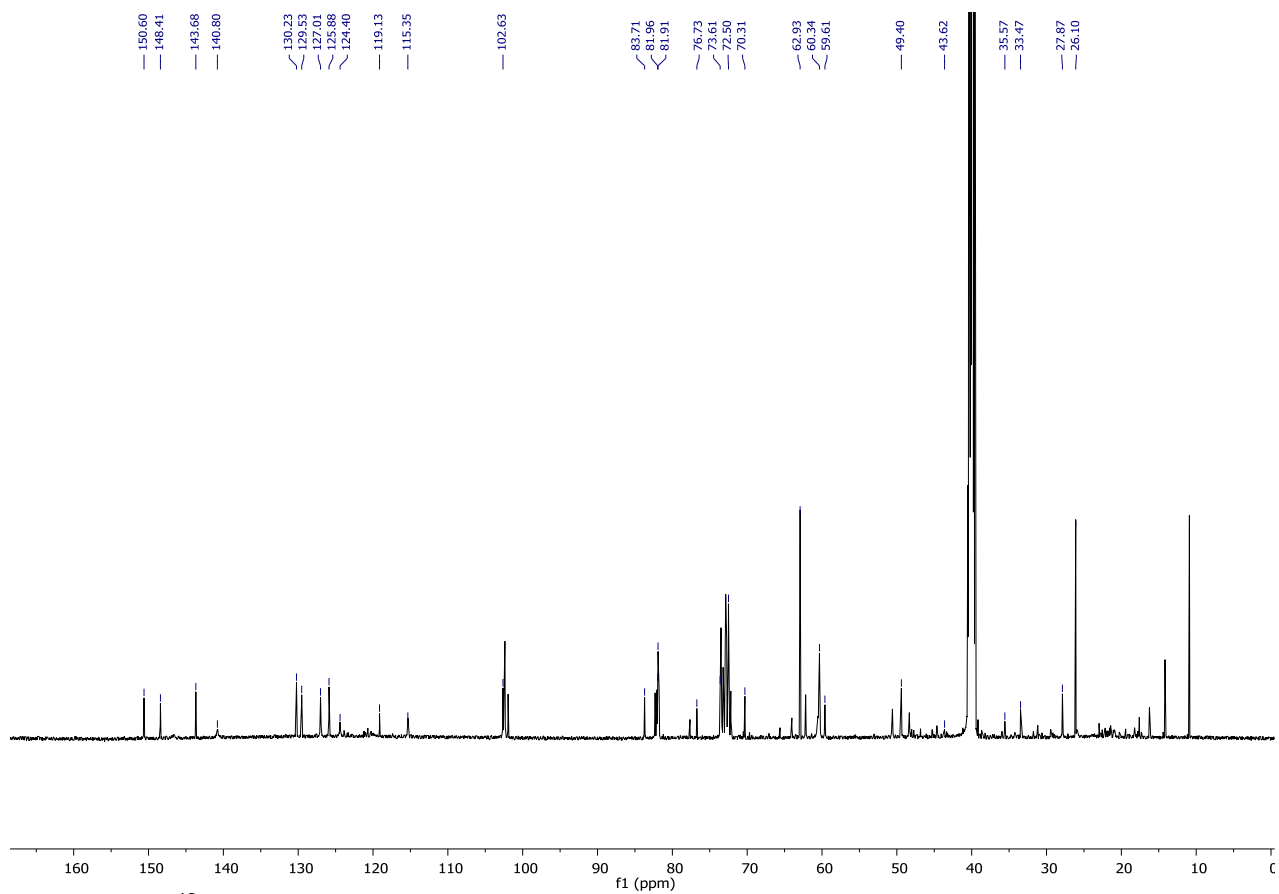

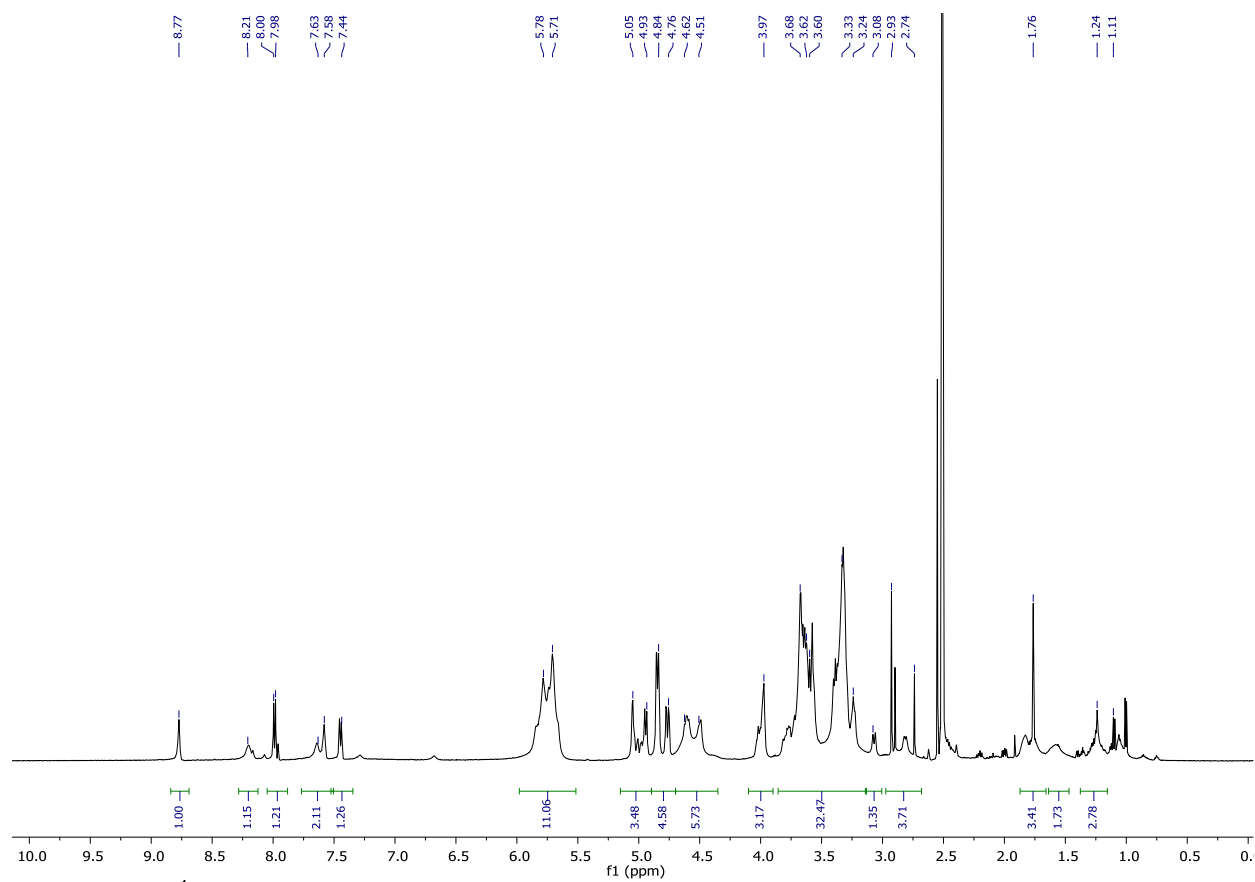

**Figure S14:**  $^1\text{H}$  NMR spectrum of compound **5c**.

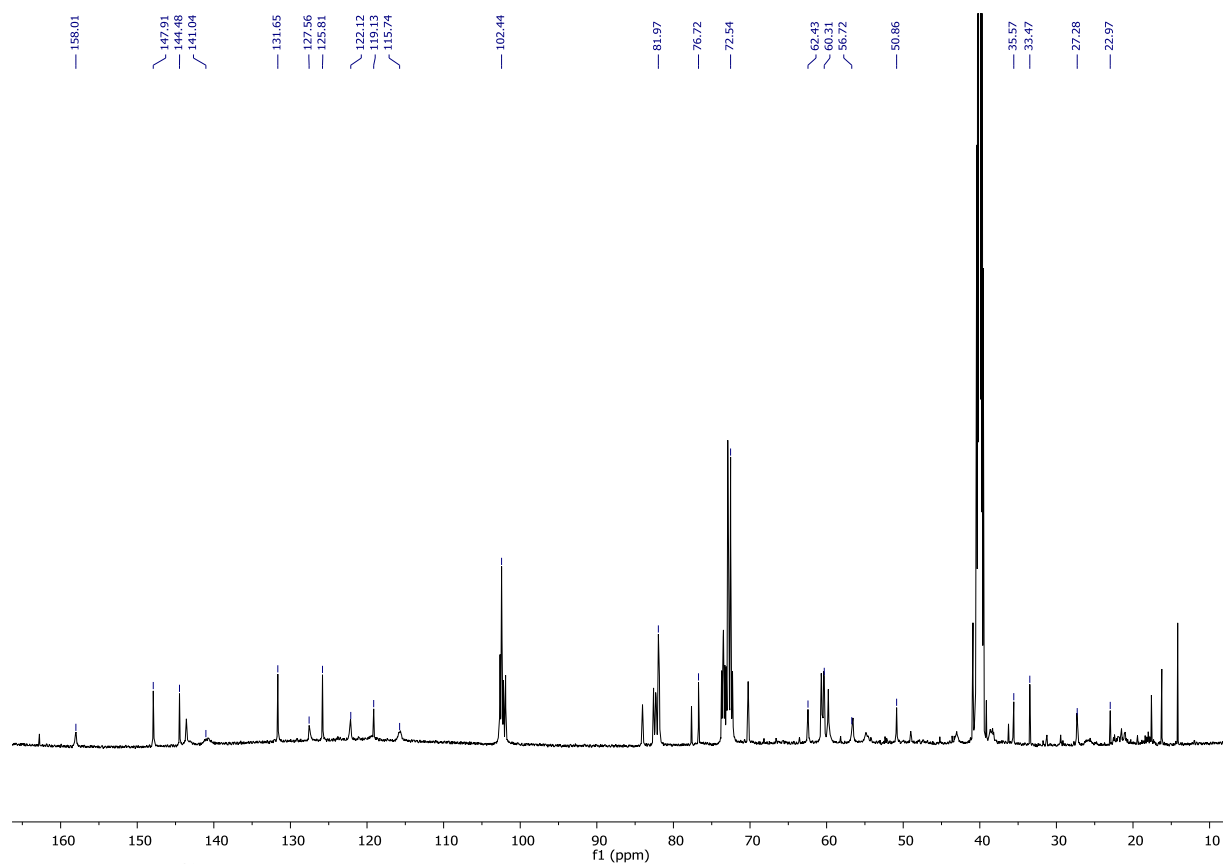

**Figure S15:**  $^{13}\text{C}$  NMR spectrum of compound **5c**.

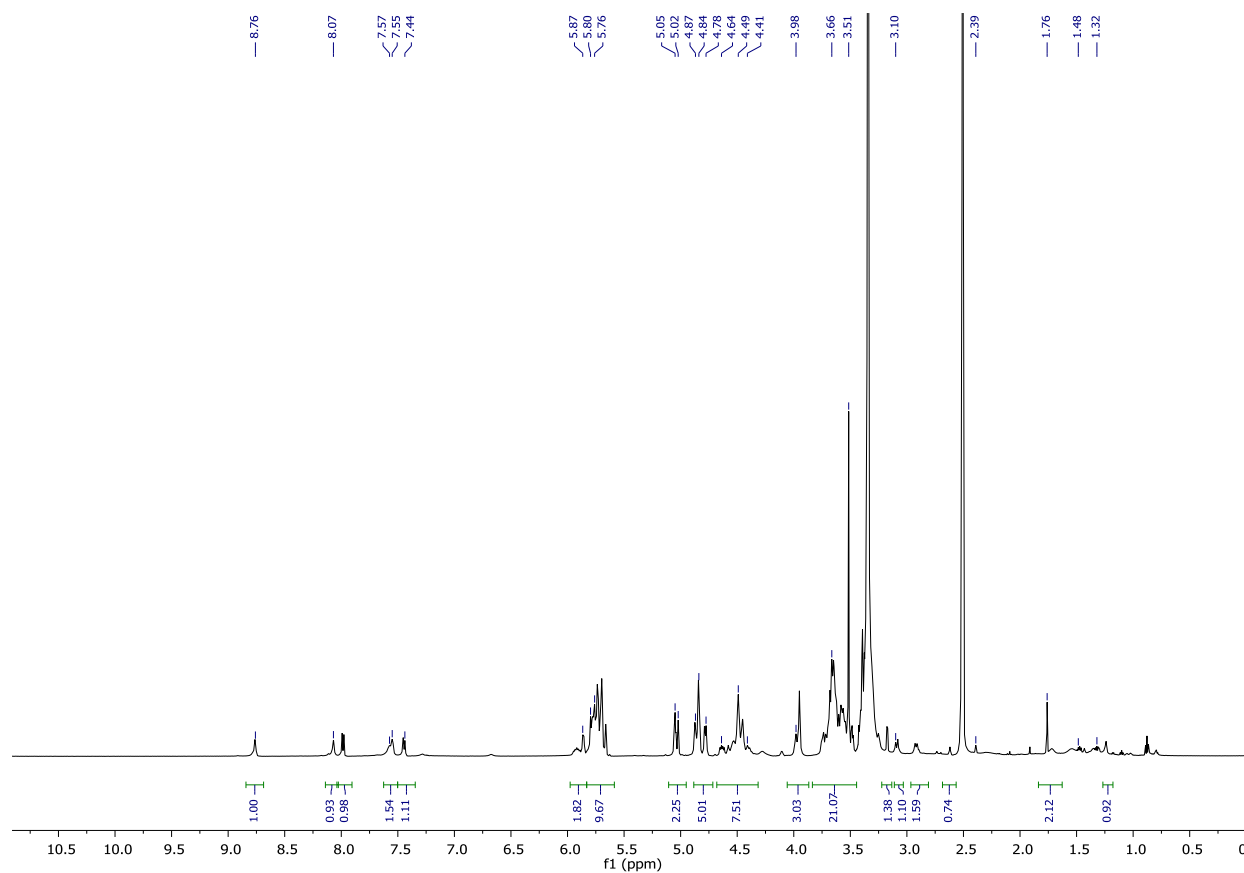

**Figure S16:**  $^1\text{H}$  NMR spectrum of compound **5d**.

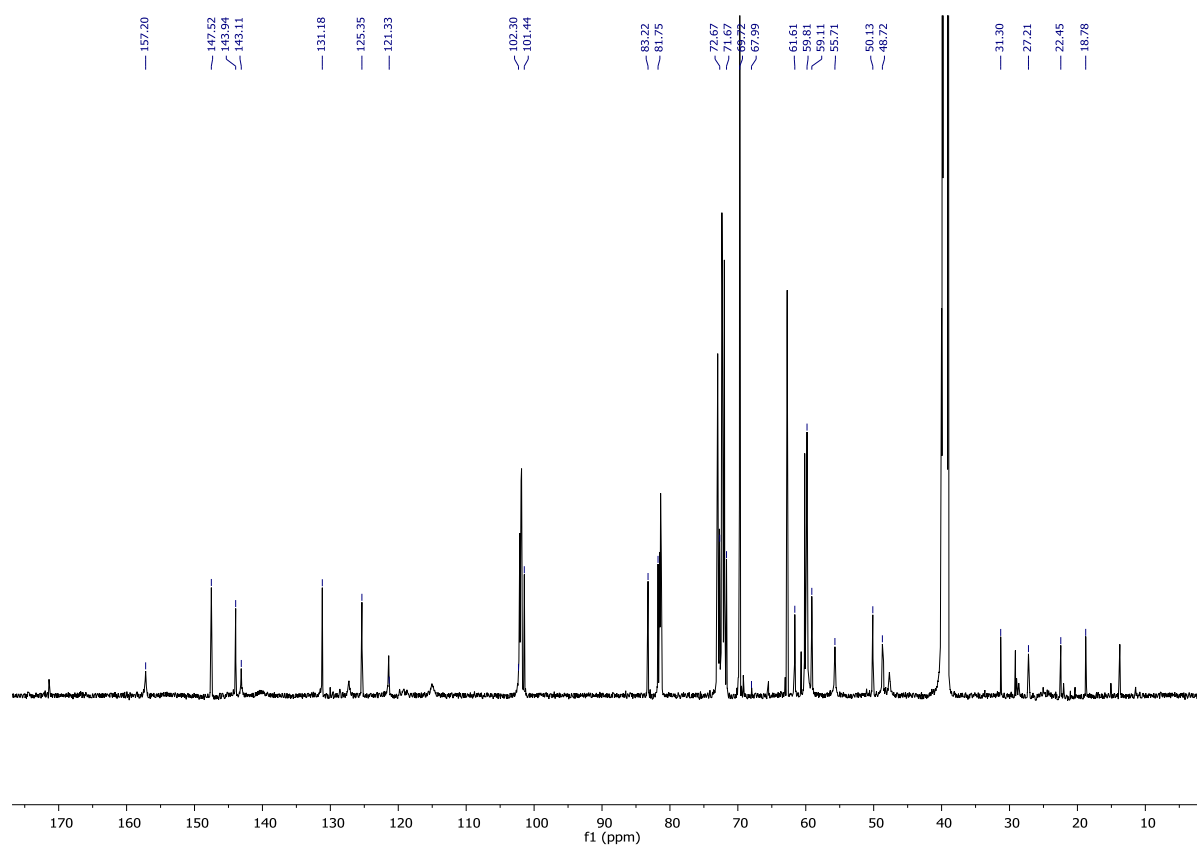

**Figure S17:**  $^{13}\text{C}$  NMR spectrum of compound **5d**.

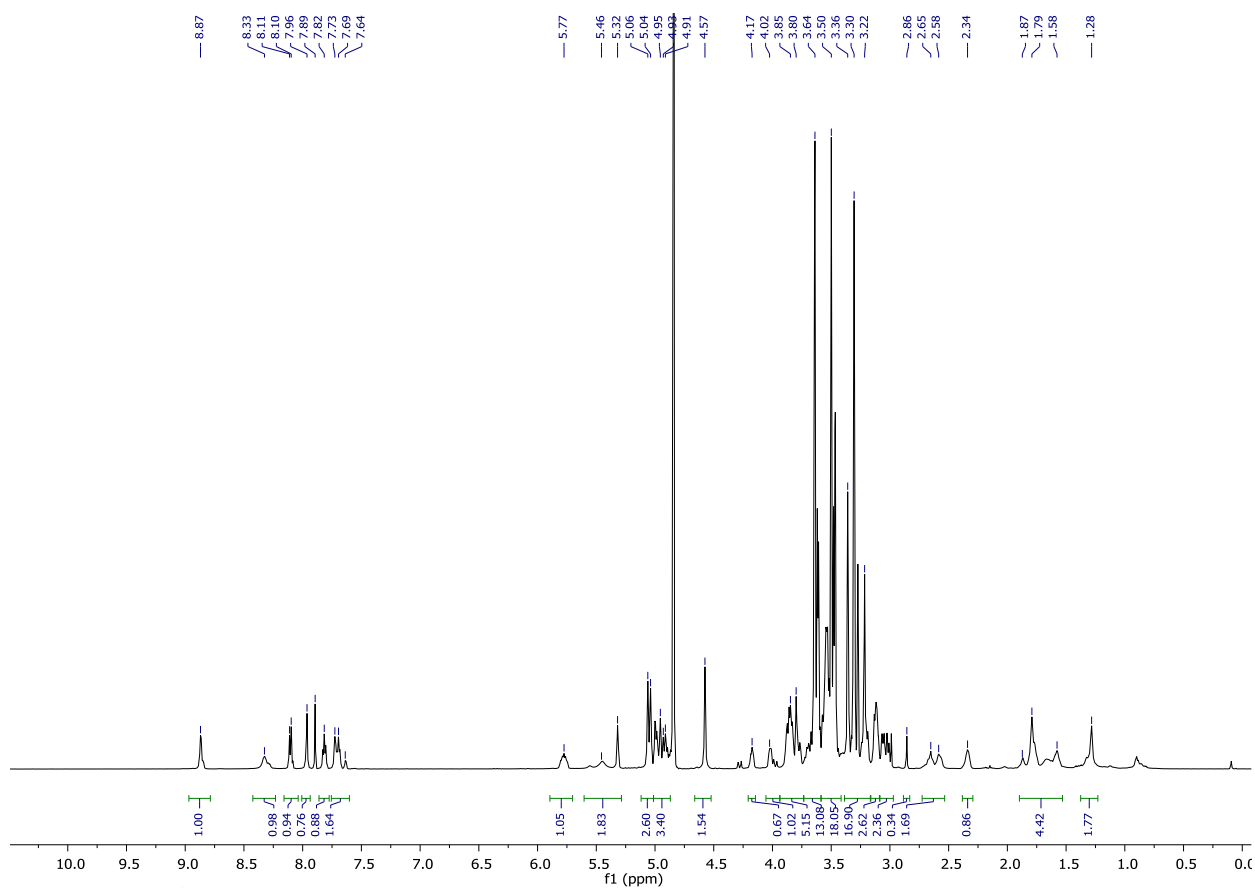

**Figure S18:  $^1\text{H}$  NMR spectrum of compound **8a**.**

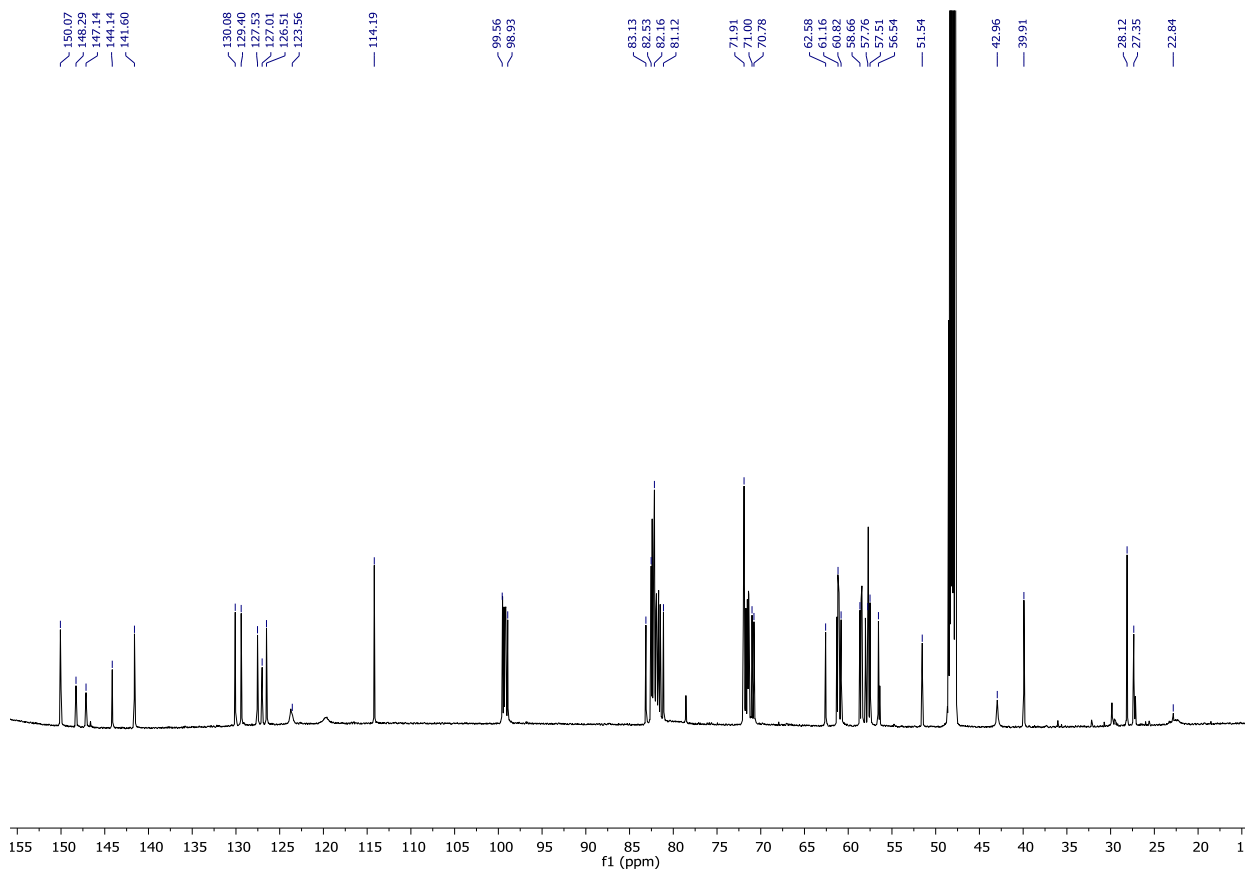

**Figure S19:  $^{13}\text{C}$  NMR spectrum of compound **8a**.**

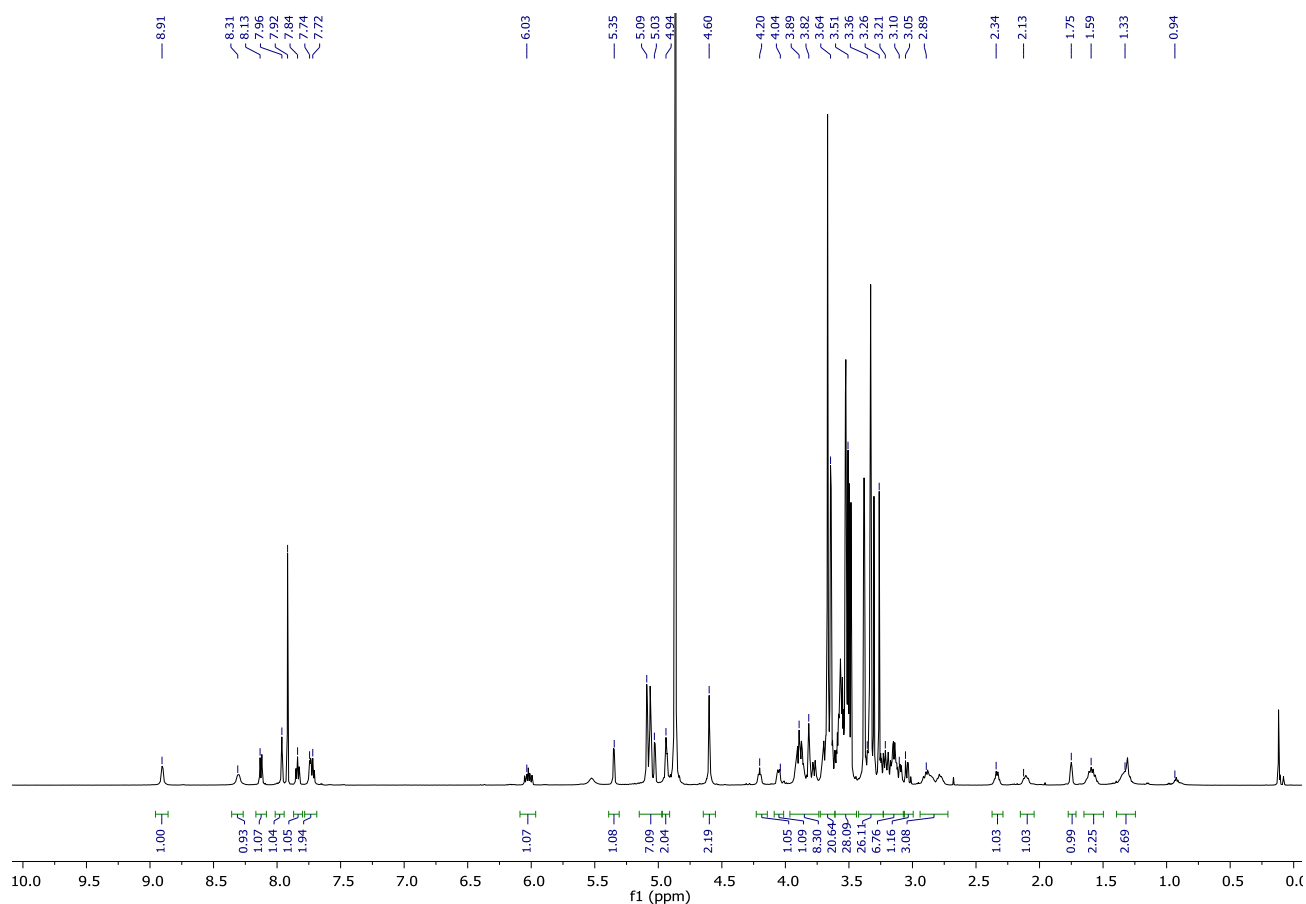

**Figure S20:  $^1\text{H}$  NMR spectrum of compound **8b**.**

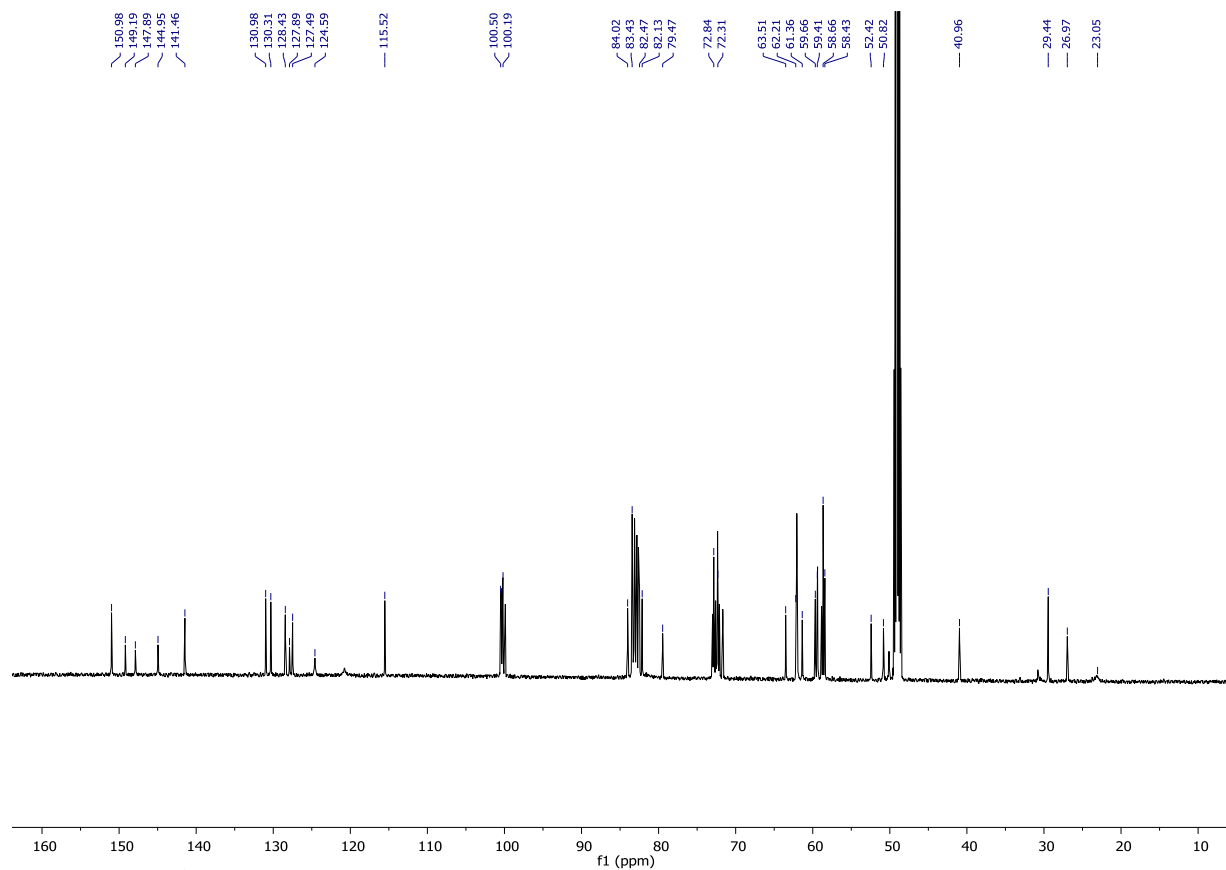

**Figure S21:  $^{13}\text{C}$  NMR spectrum of compound **8b**.**

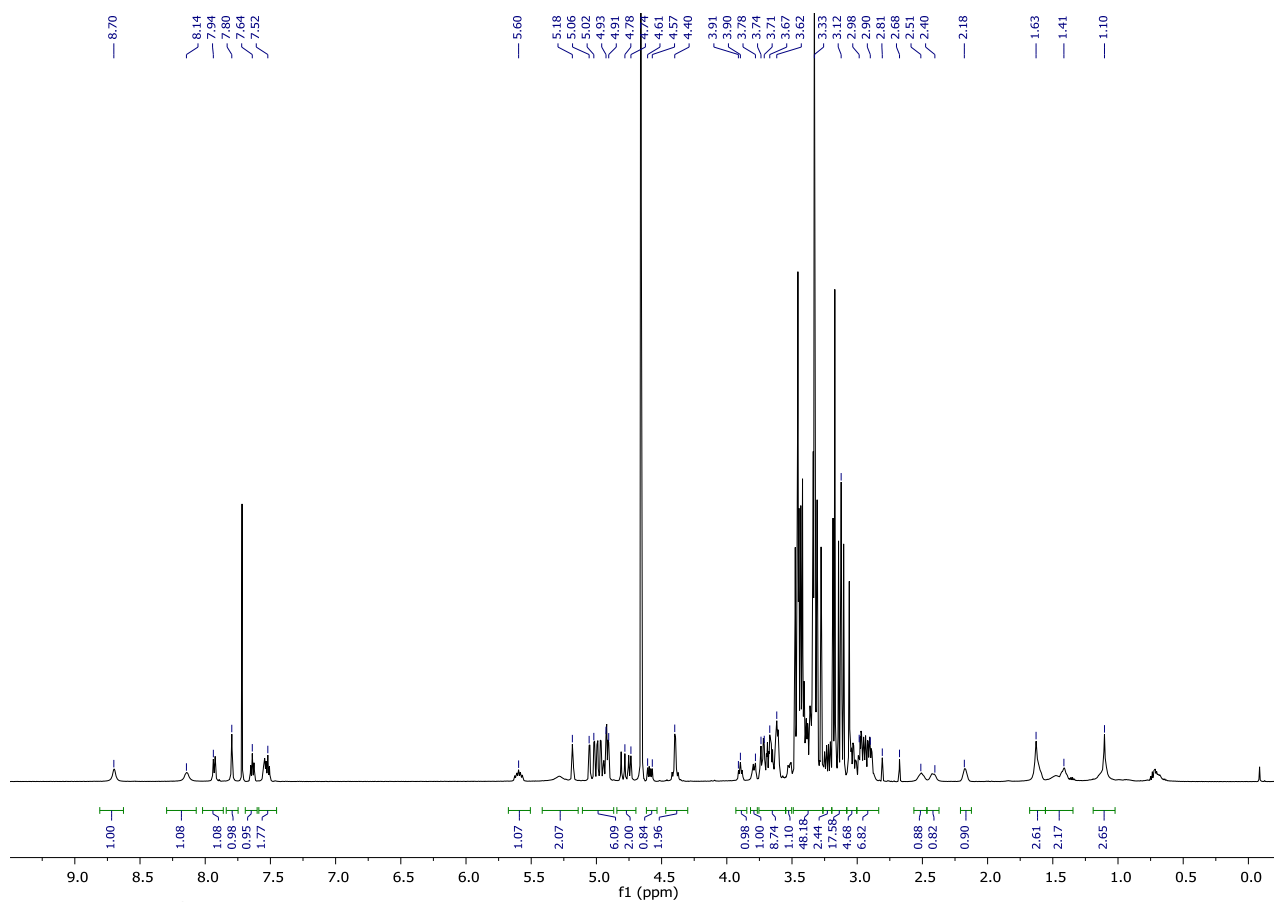

**Figure S22:  $^1\text{H}$  NMR spectrum of compound **8c**.**

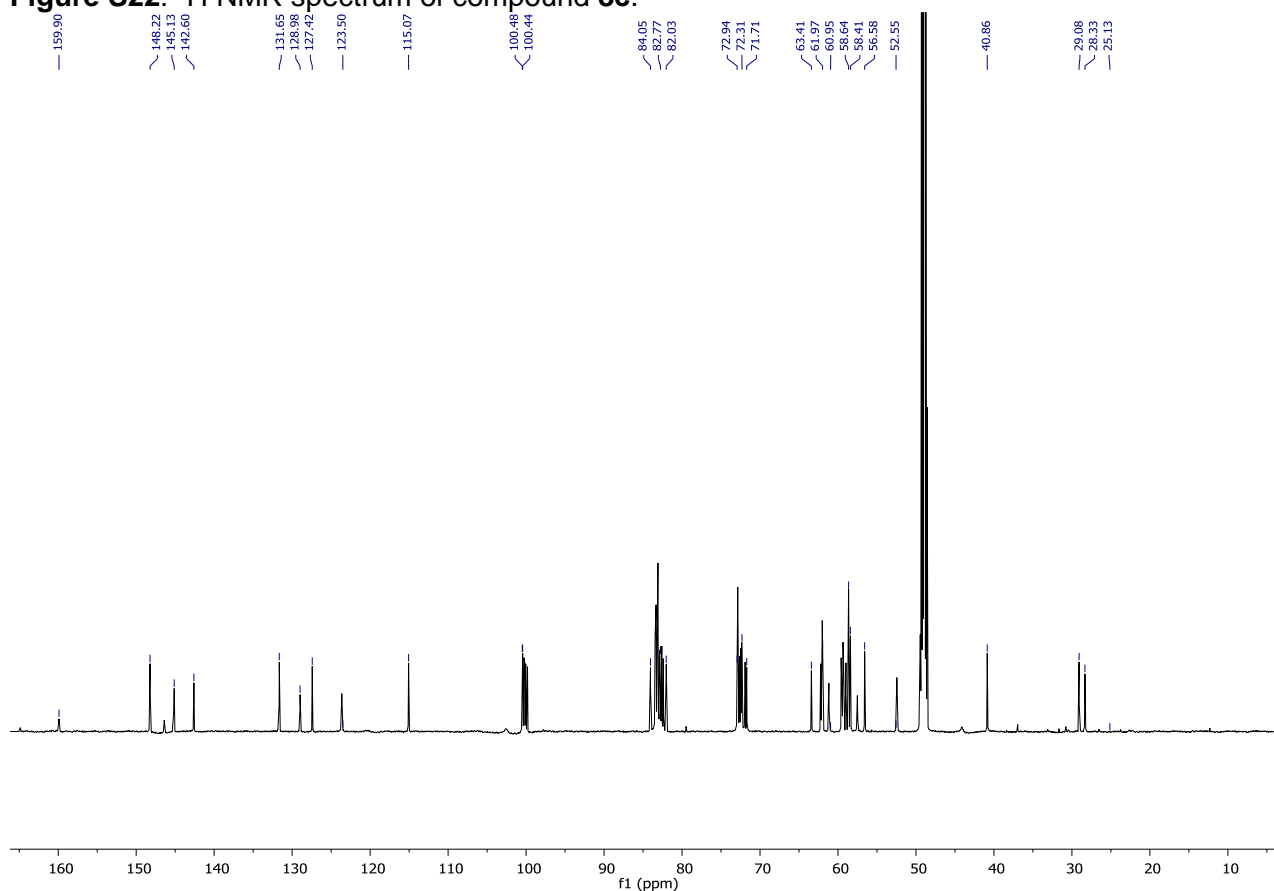

**Figure S23:  $^{13}\text{C}$  NMR spectrum of compound **8c**.**

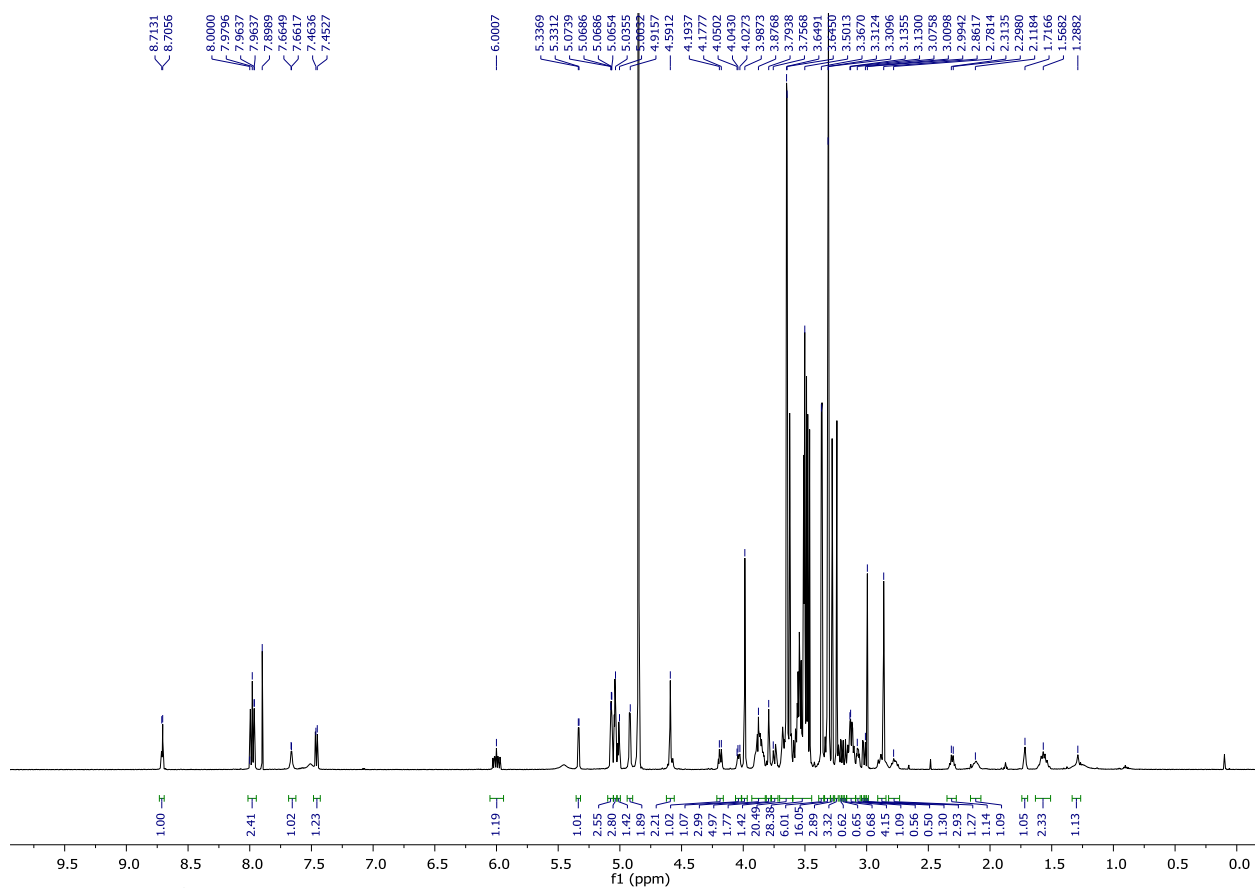

Figure S24:  $^1\text{H}$  NMR spectrum of compound **8d**.

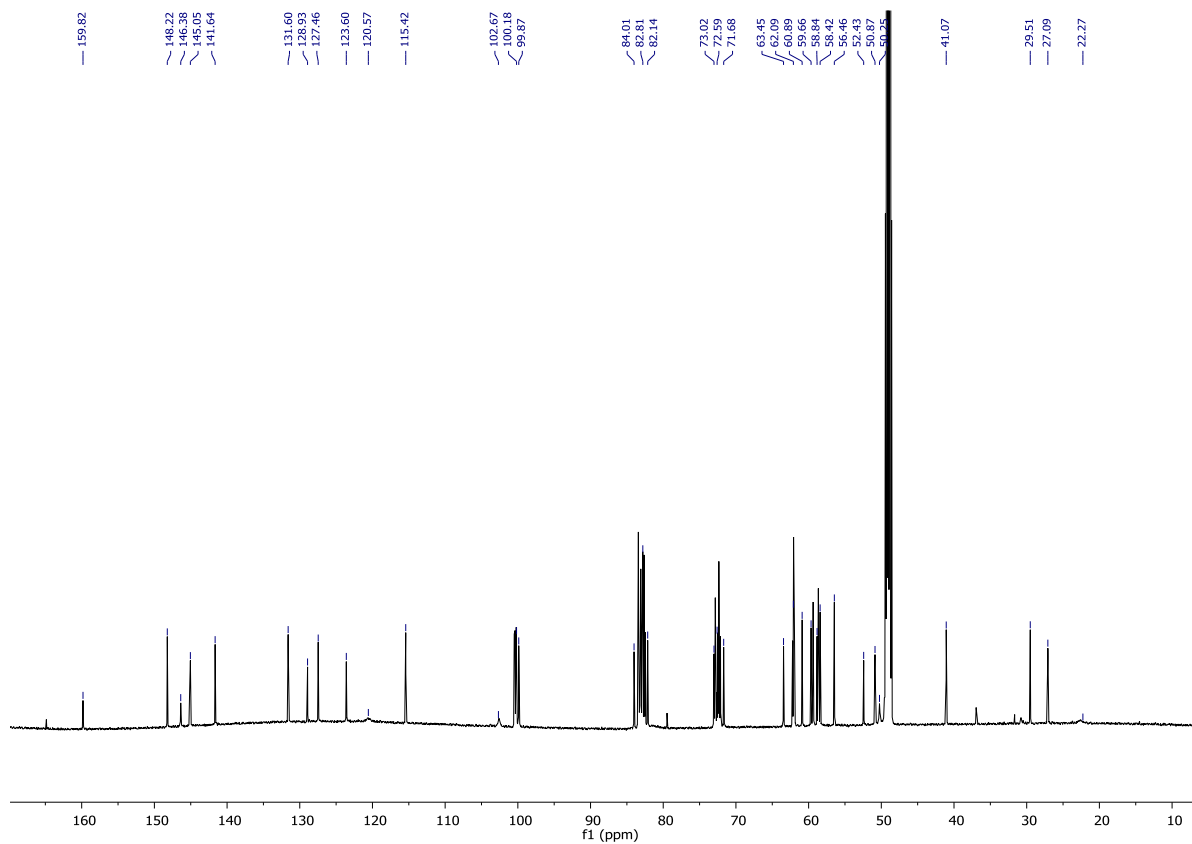

Figure S25:  $^{13}\text{C}$  NMR spectrum of compound **8d**.

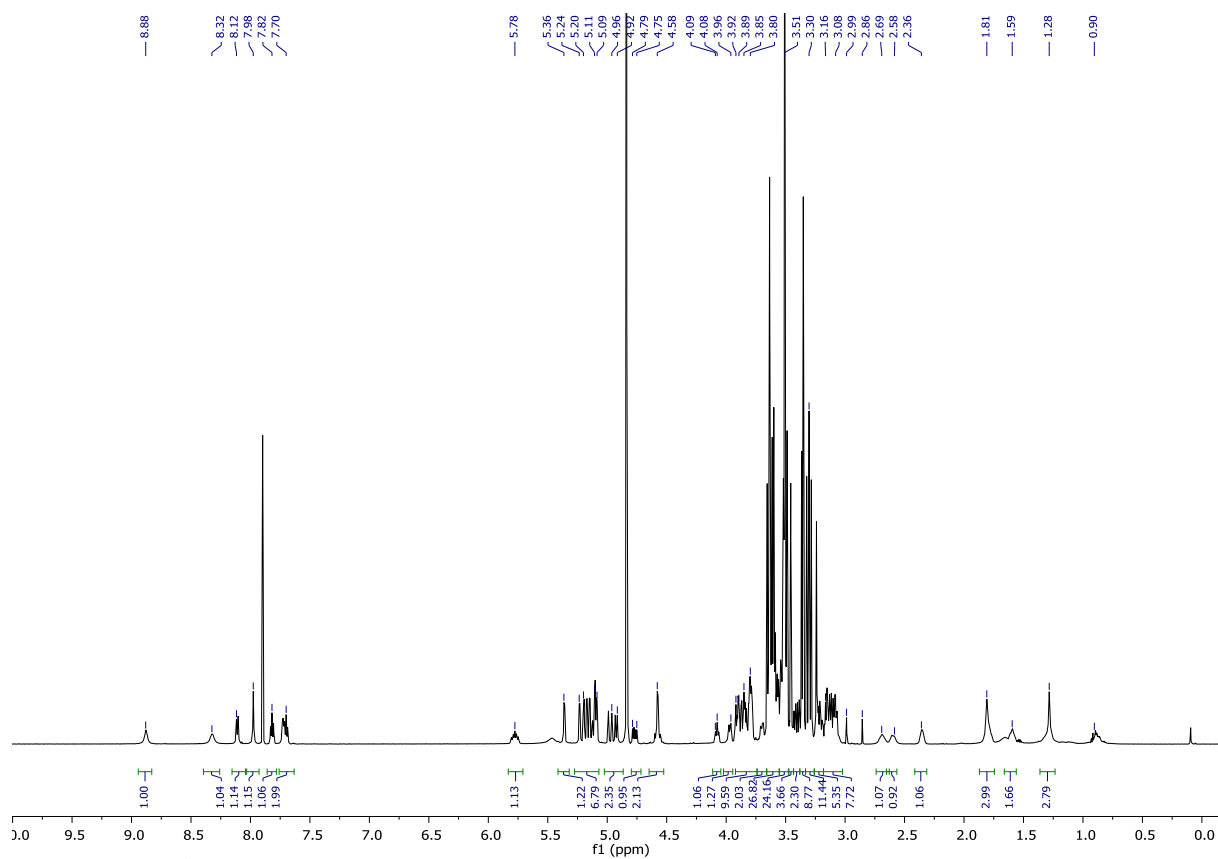

**Figure S26:**  $^1\text{H}$  NMR spectrum of compound **9a**.

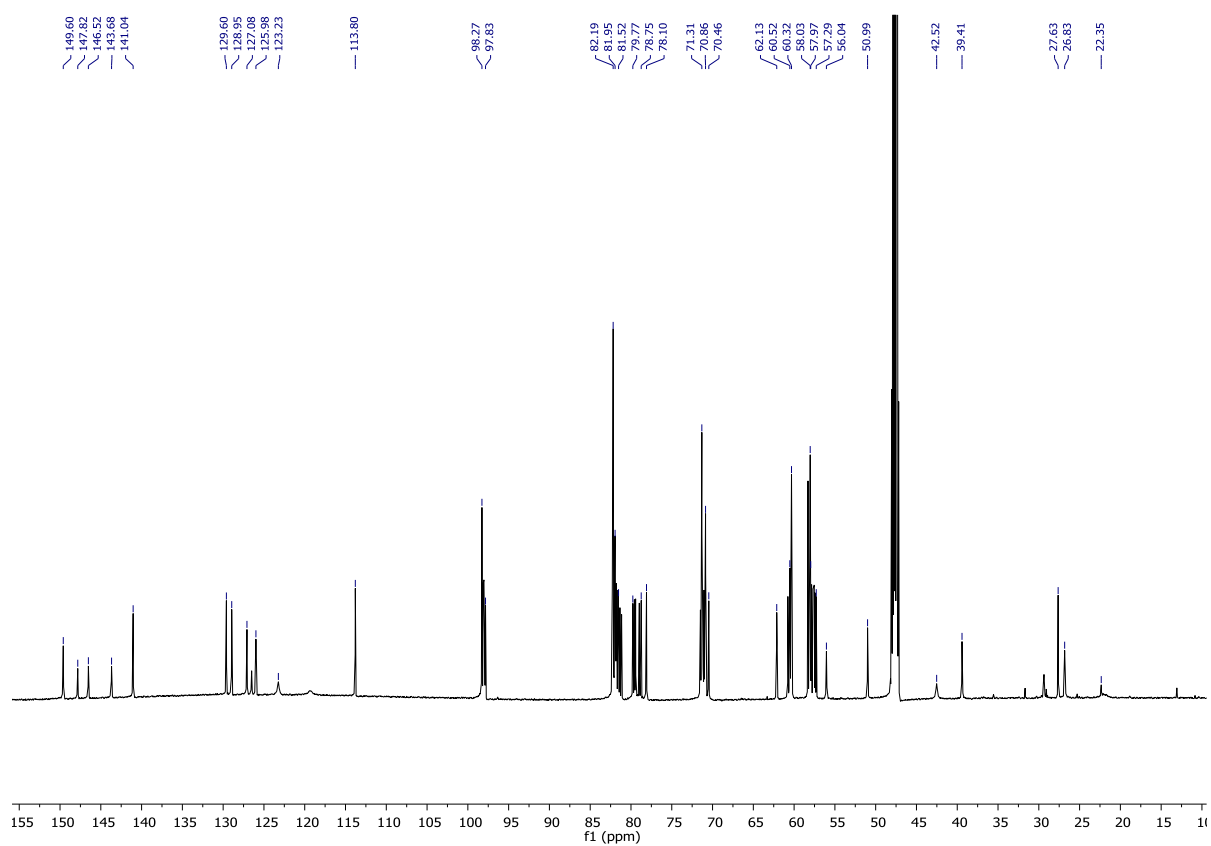

**Figure S27:**  $^{13}\text{C}$  NMR spectrum of compound **9a**.

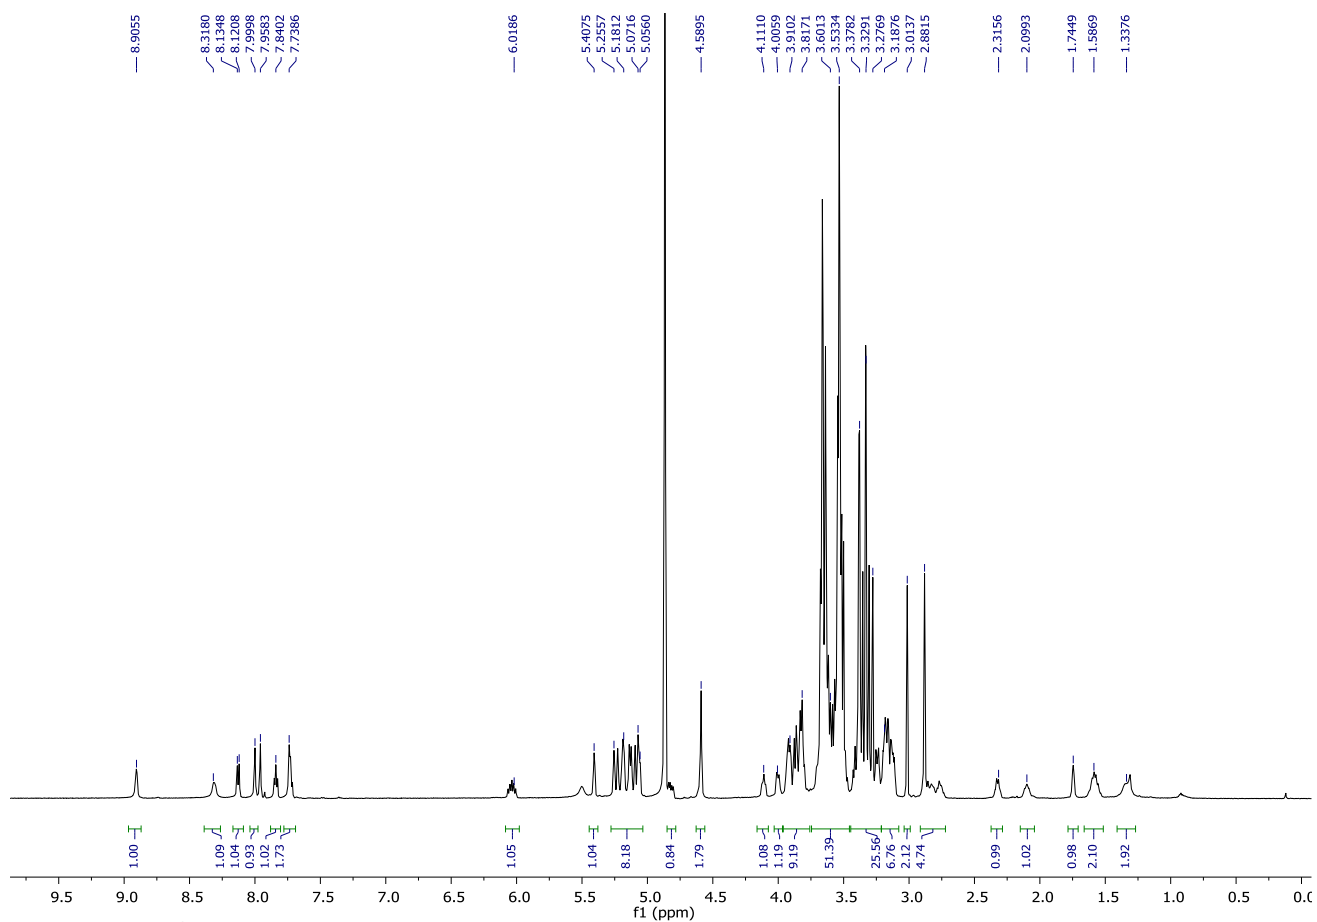

Figure S28:  $^1\text{H}$  NMR spectrum of compound **9b**.

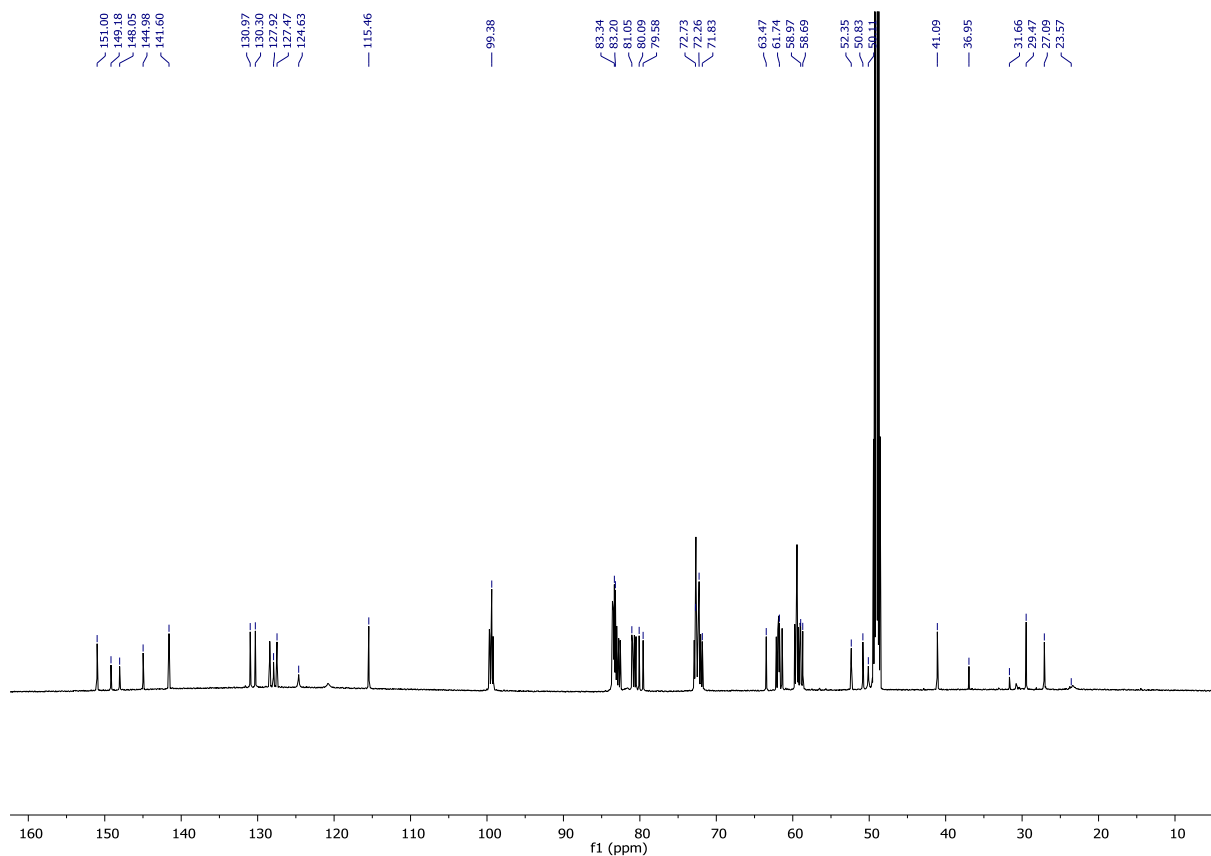

Figure S29:  $^{13}\text{C}$  NMR spectrum of compound **9b**.

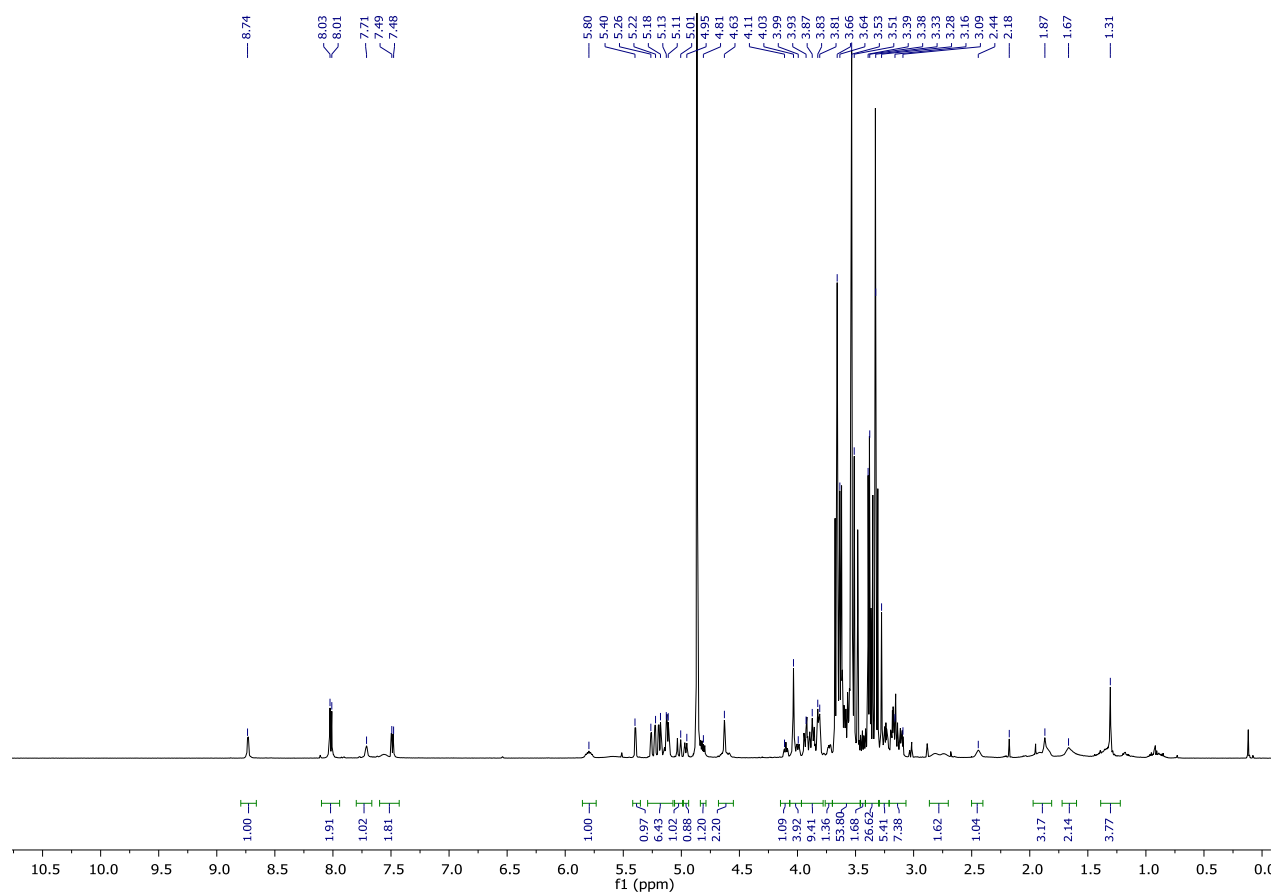

**Figure S30:  $^1\text{H}$  NMR spectrum of compound **9c**.**

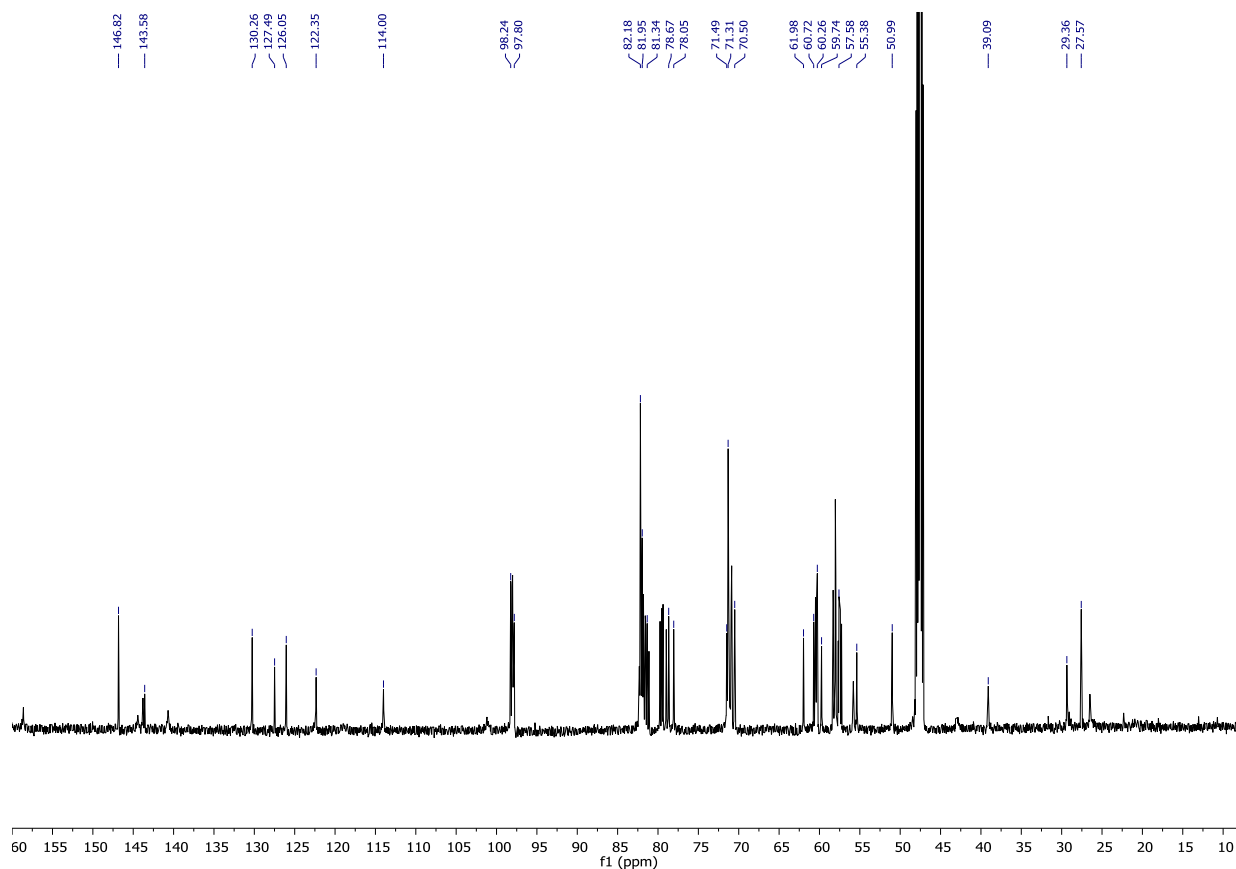

**Figure S31:  $^{13}\text{C}$  NMR spectrum of compound **9c**.**

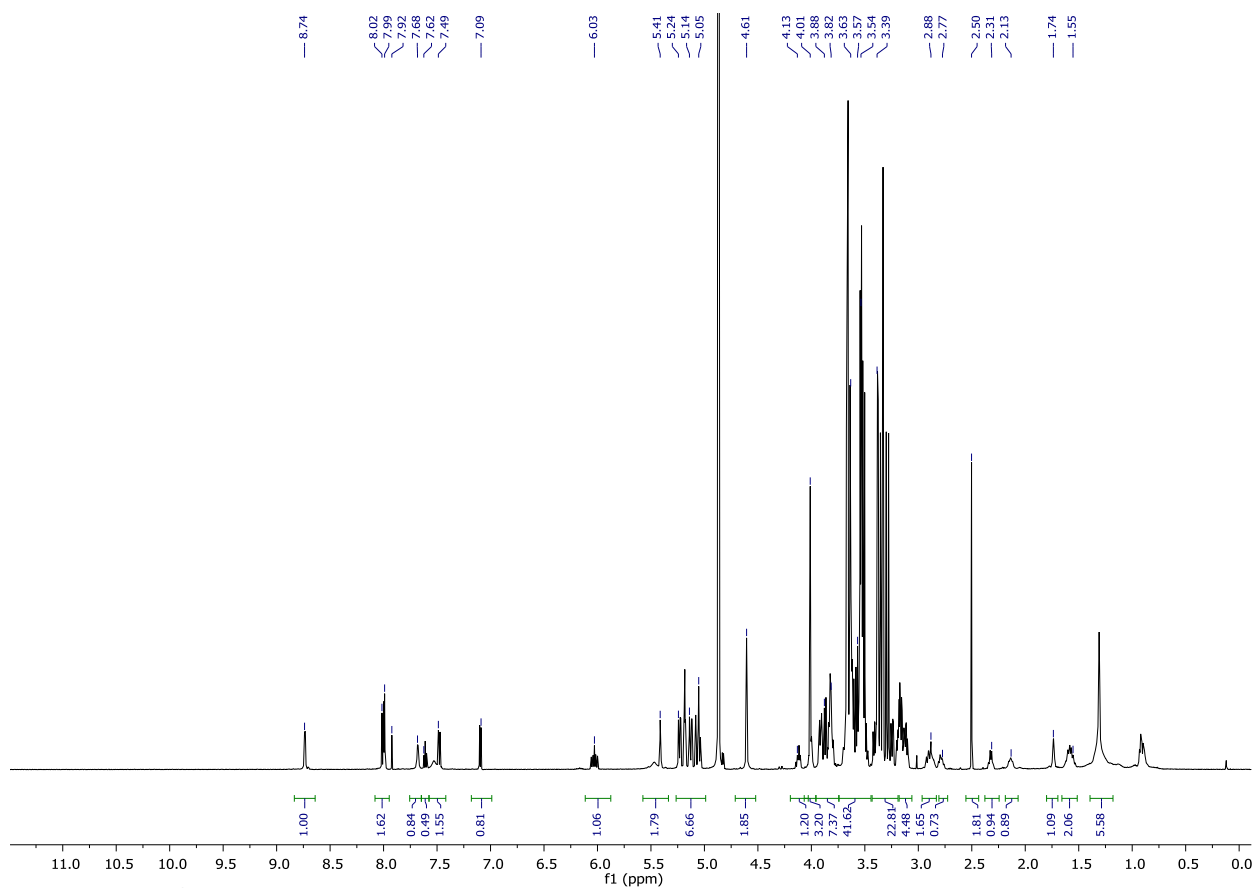

**Figure S32:  $^1\text{H}$  NMR spectrum of compound **9d**.**

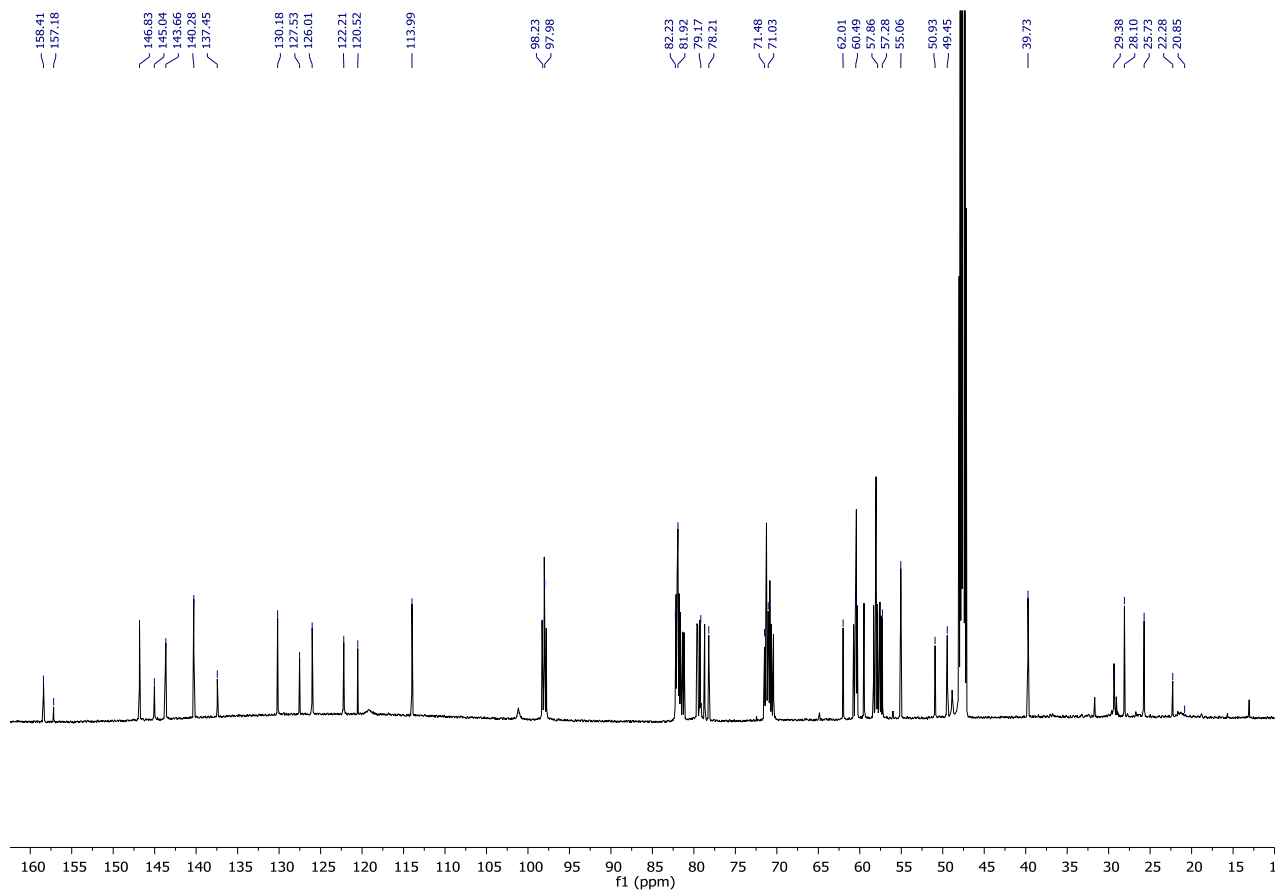

**Figure S33:  $^{13}\text{C}$  NMR spectrum of compound **9d**.**

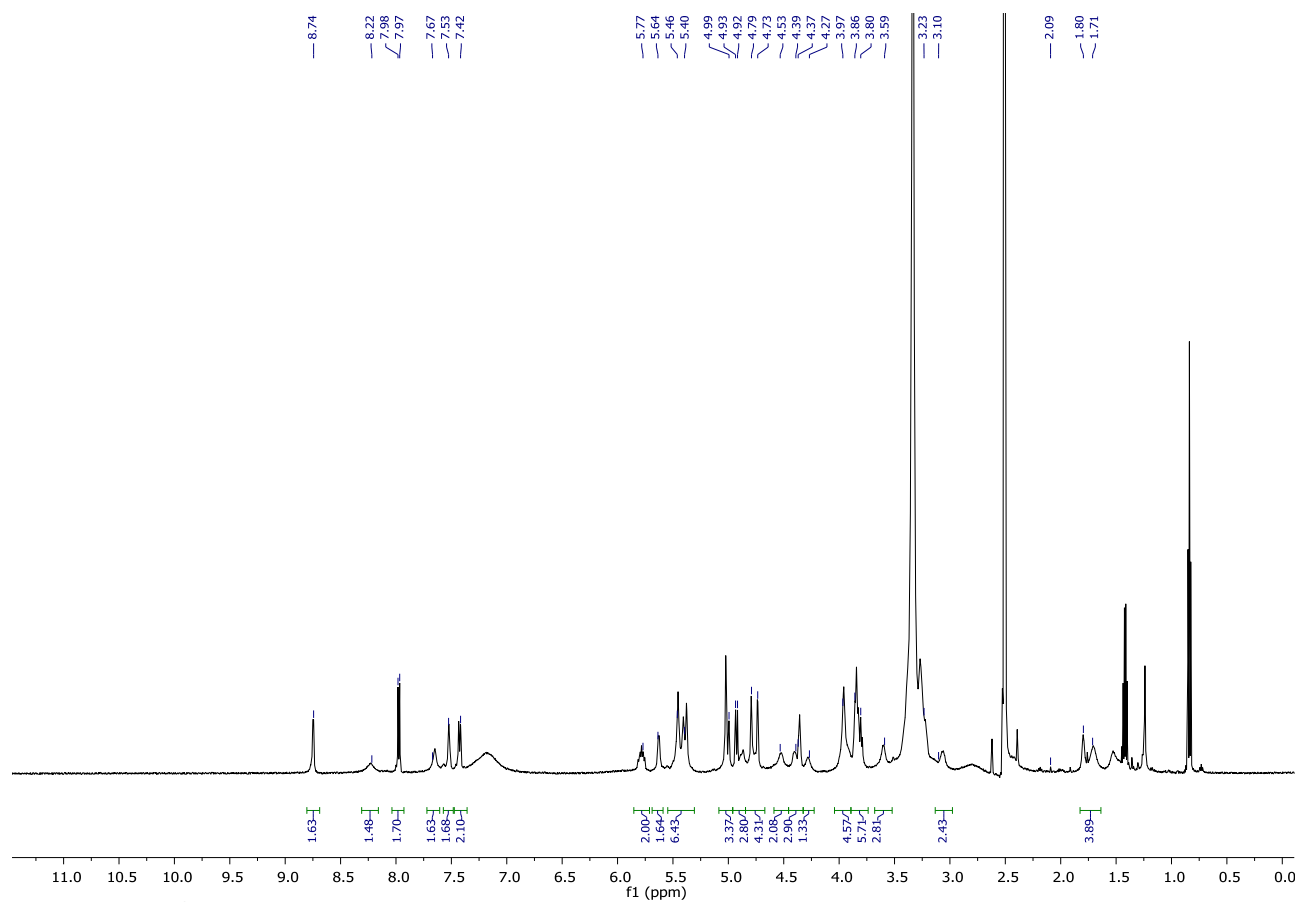

**Figure S34:  $^1\text{H}$  NMR spectrum of compound 11.**

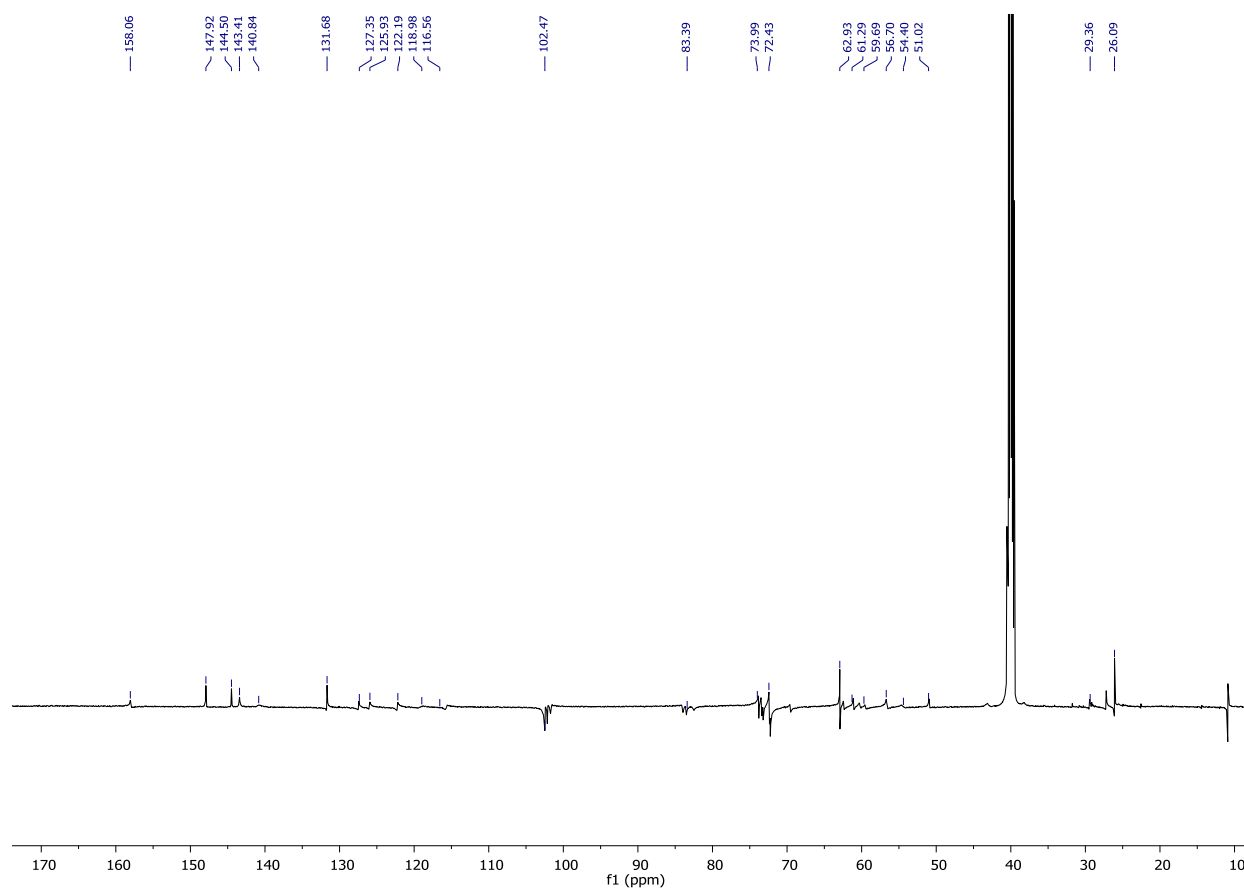

**Figure S35:  $^{13}\text{C}$  NMR spectrum of compound 11.**

## HRMS spectra of prepared CD compounds

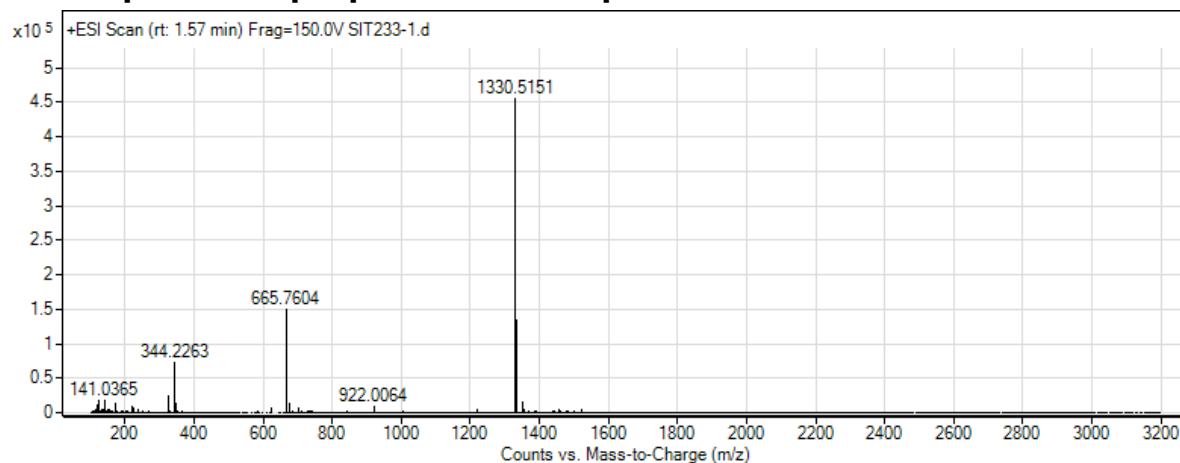

Figure S36: HRMS spectrum of compound 4a.

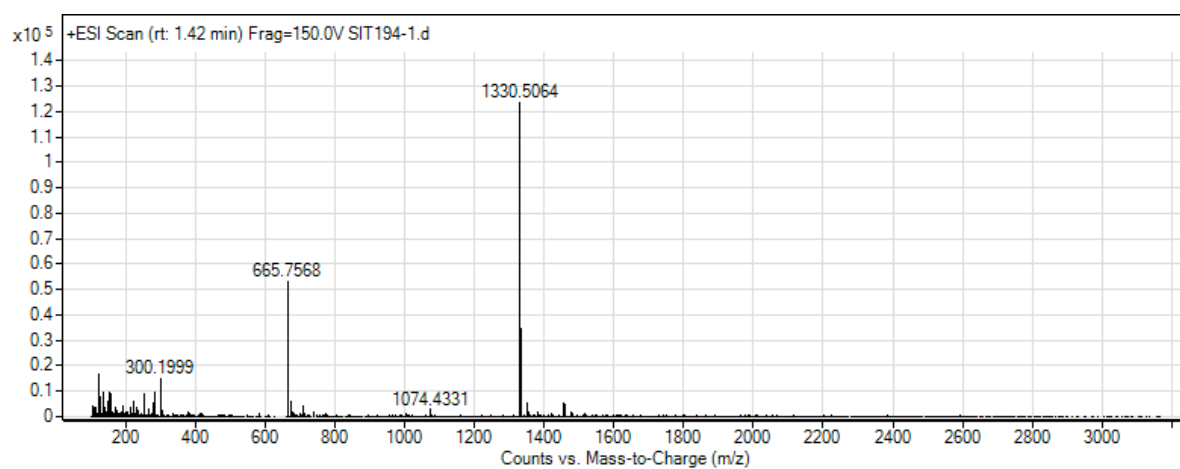

Figure S37: HRMS spectrum of compound 4b.

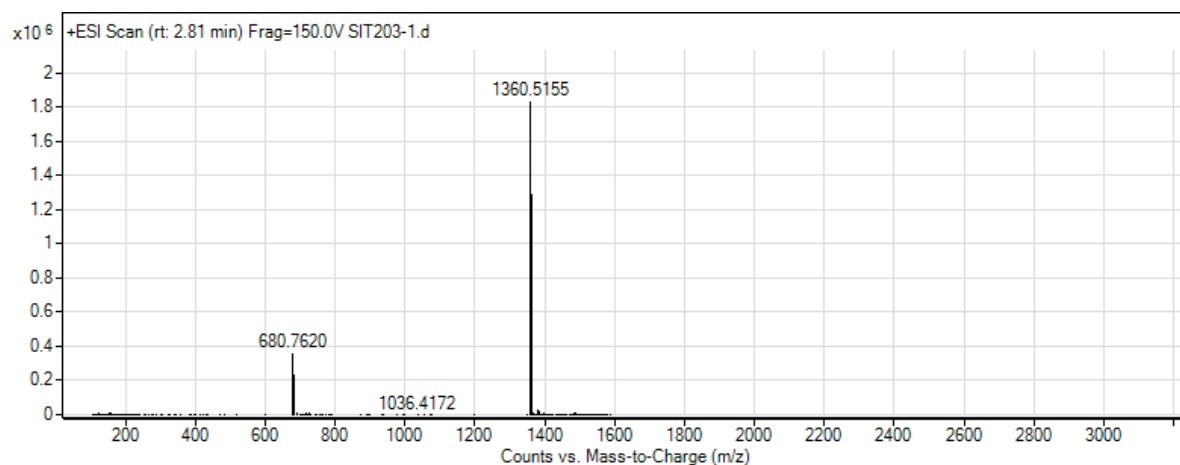

Figure S38: HRMS spectrum of compound 4c.

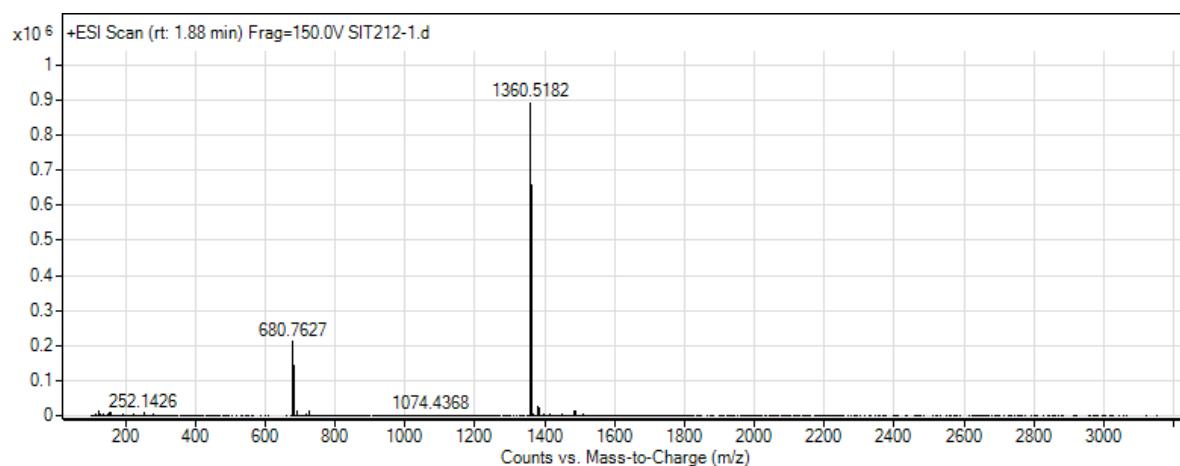

**Figure S39:** HRMS spectrum of compound **4d**.

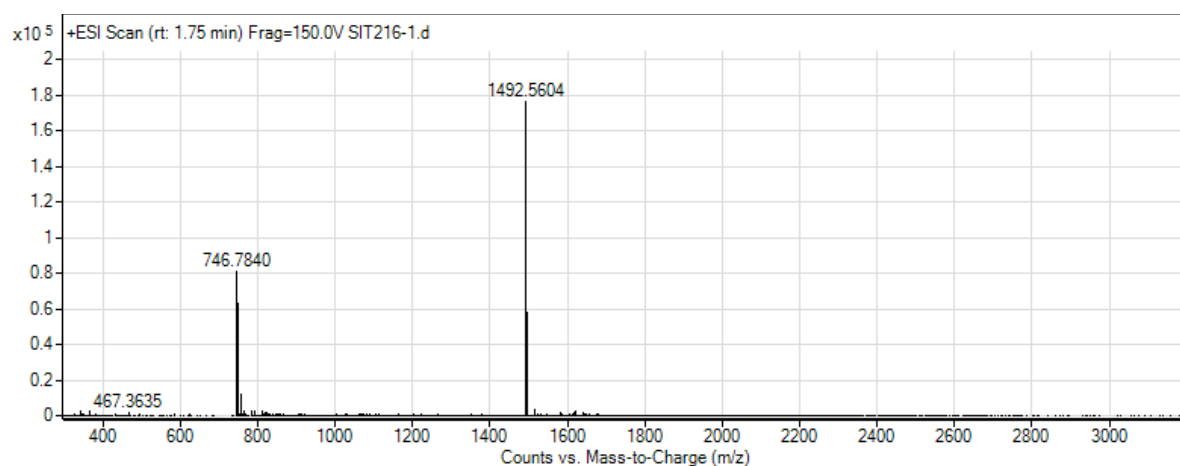

**Figure S40:** HRMS spectrum of compound **5a**.

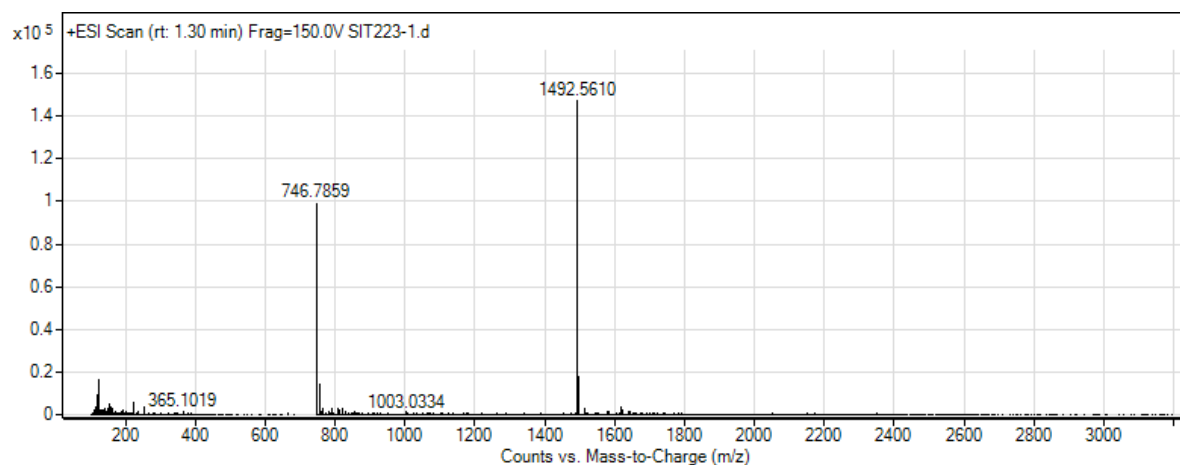

**Figure S41:** HRMS spectrum of compound **5b**.

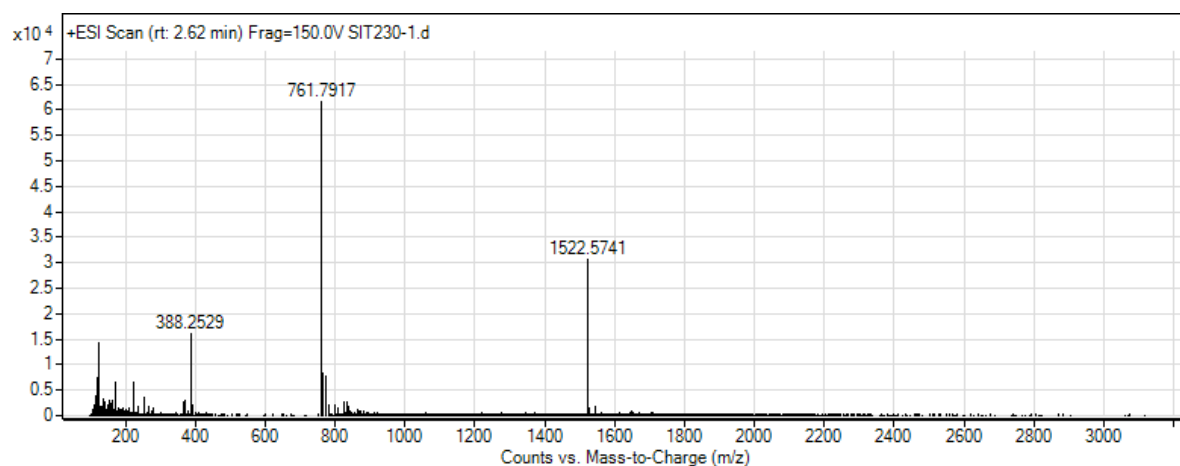

**Figure S42:** HRMS spectrum of compound **5c**.

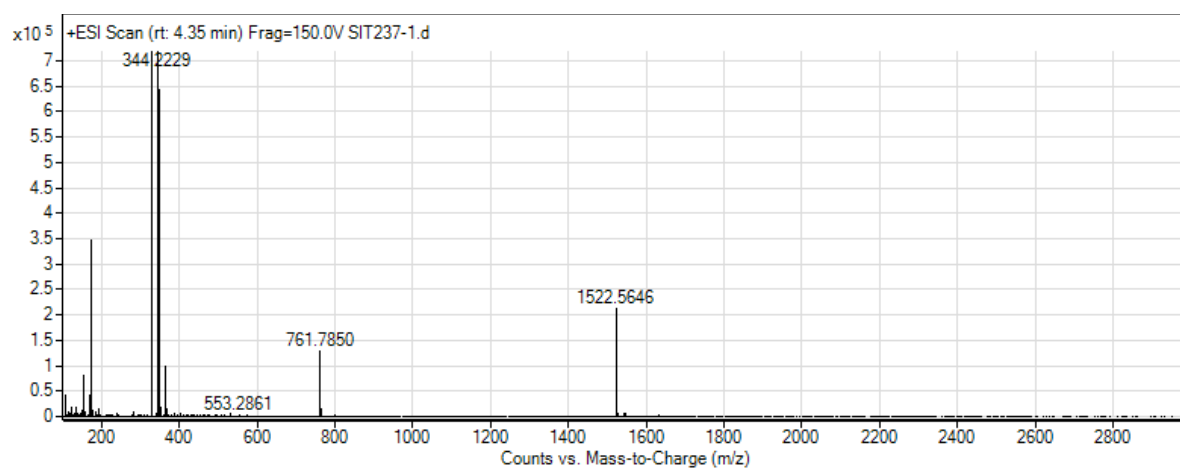

**Figure S43:** HRMS spectrum of compound **5d**.

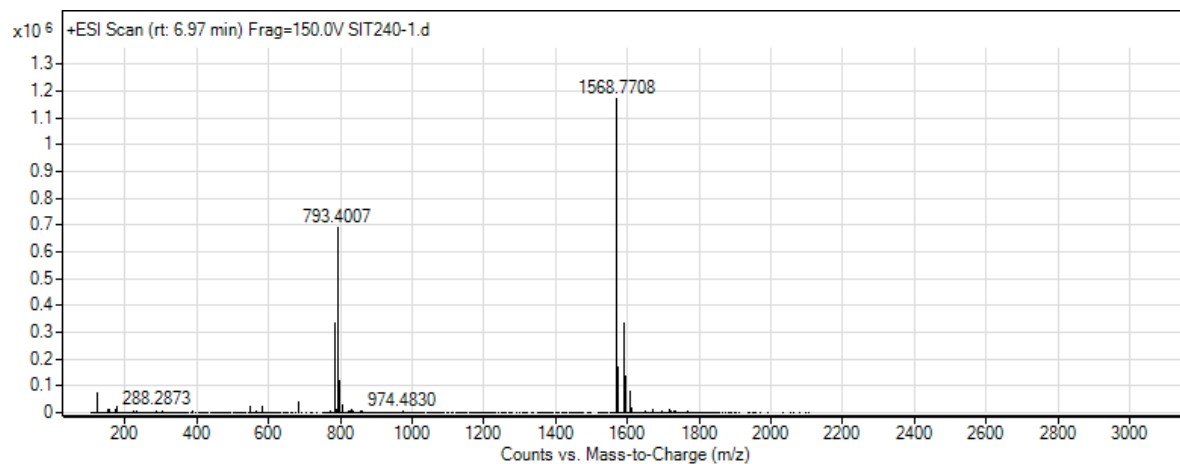

**Figure S44:** HRMS spectrum of compound **8a**.

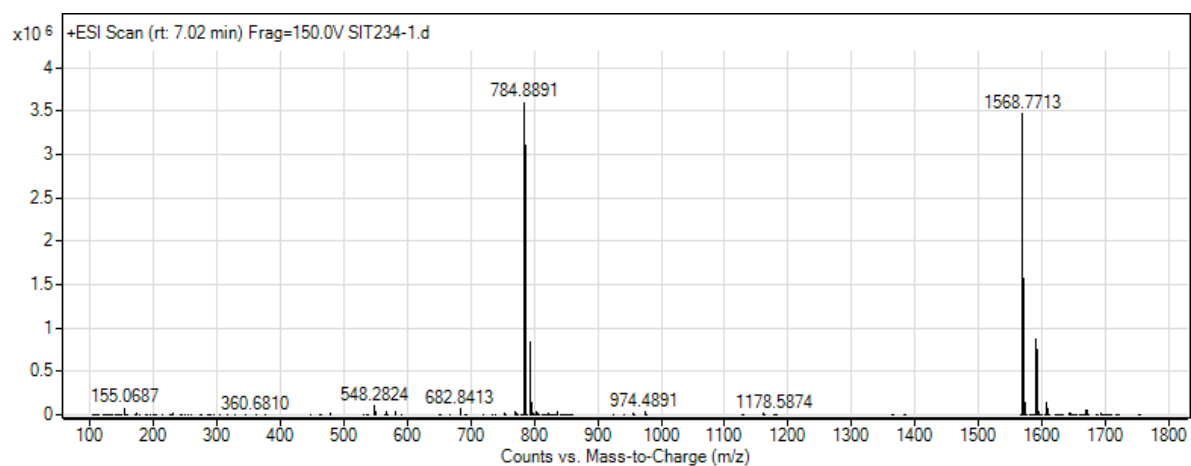

**Figure S45:** HRMS spectrum of compound **8b**.

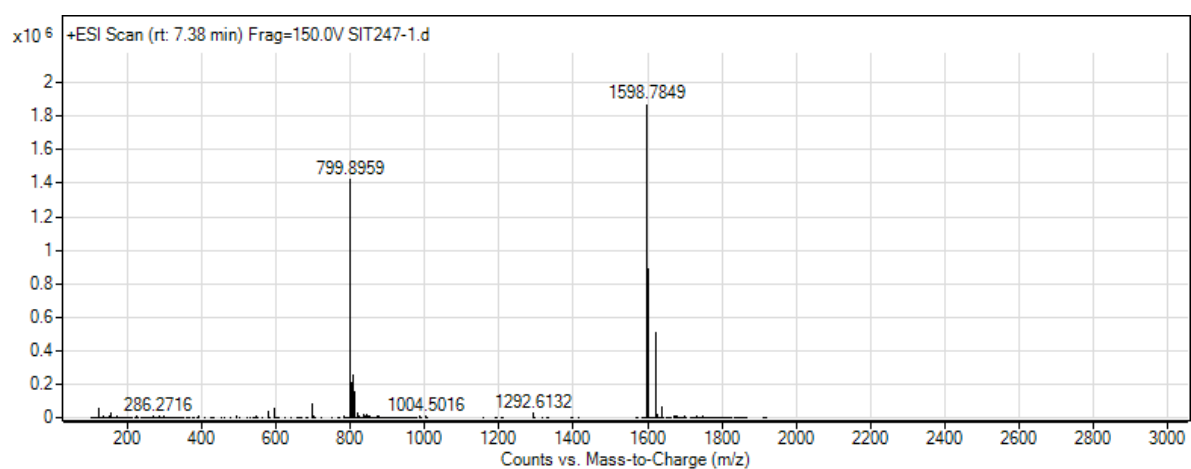

**Figure S46:** HRMS spectrum of compound **8c**.

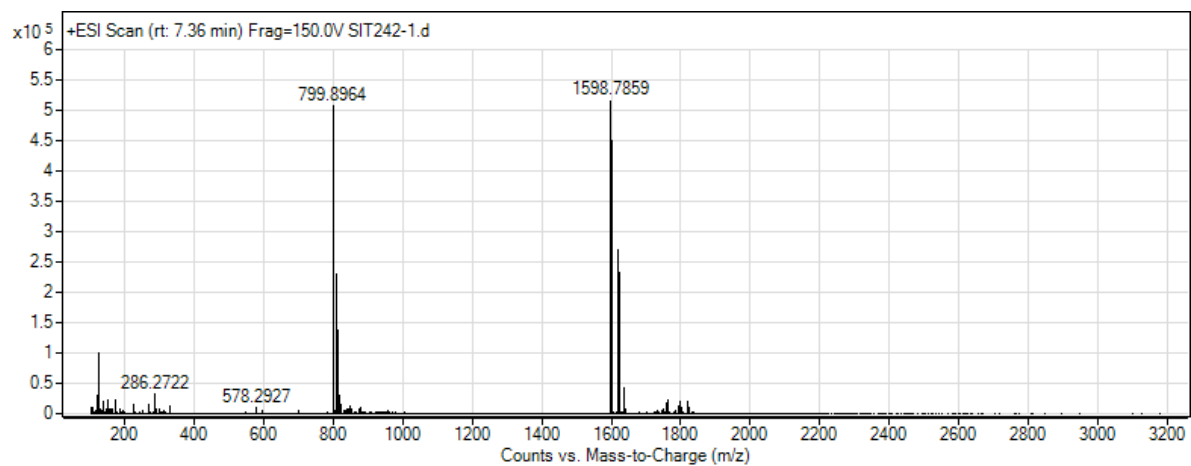

**Figure S47:** HRMS spectrum of compound **8d**.

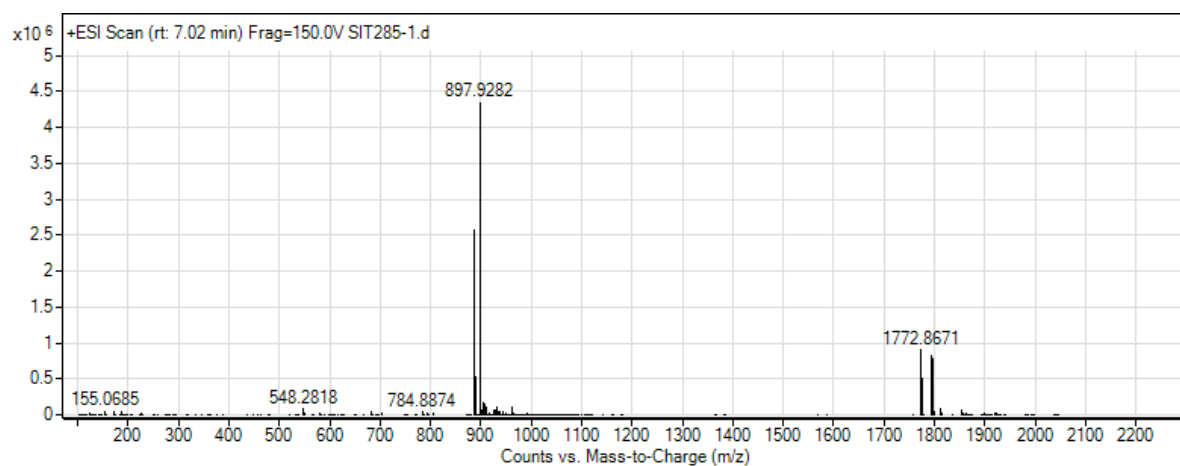

**Figure S48:** HRMS spectrum of compound **9a**.

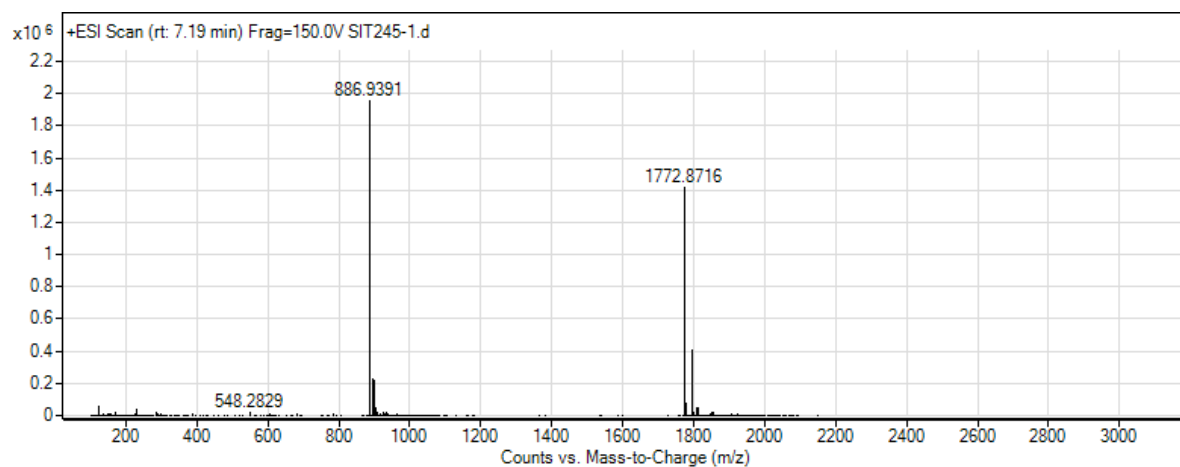

**Figure S49:** HRMS spectrum of compound **9b**.

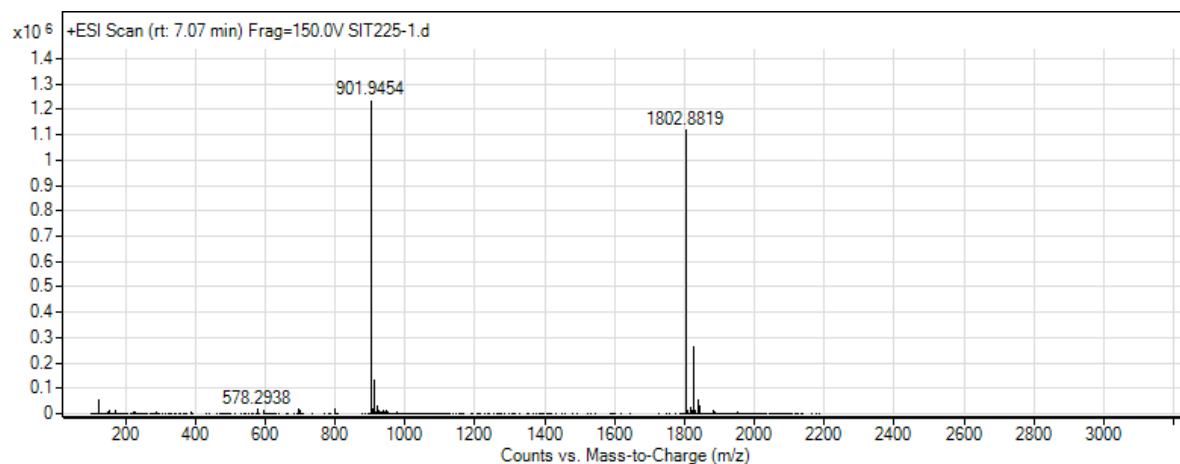

**Figure S50:** HRMS spectrum of compound **9c**.

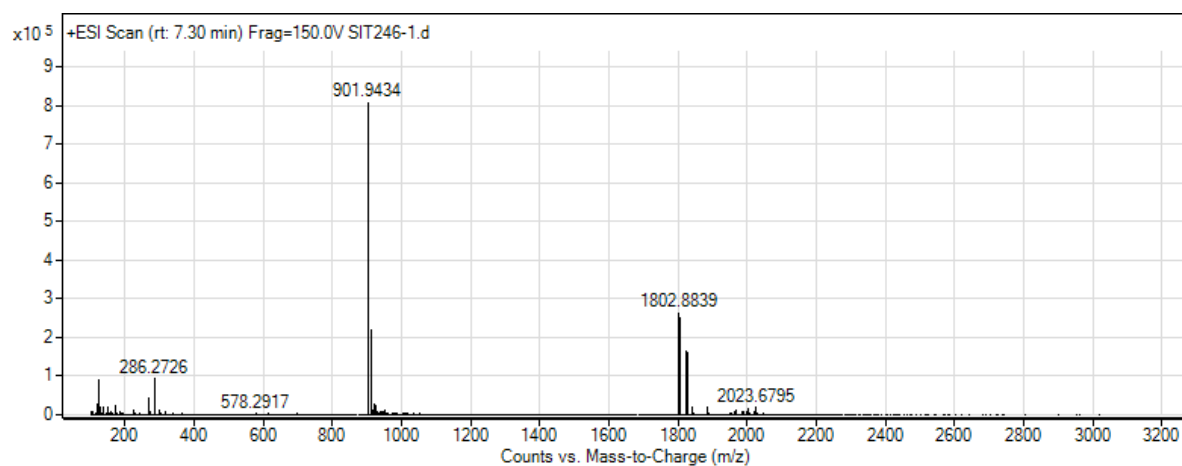

**Figure S51:** HRMS spectrum of compound **9d**.

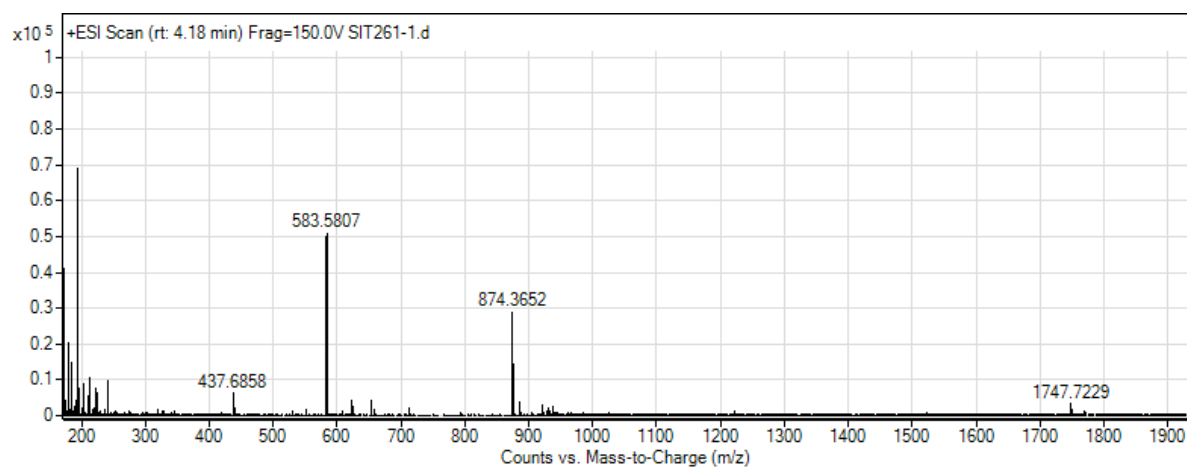

**Figure S52:** HRMS spectrum of compound **11**.

## Chiral HPLC chromatograms

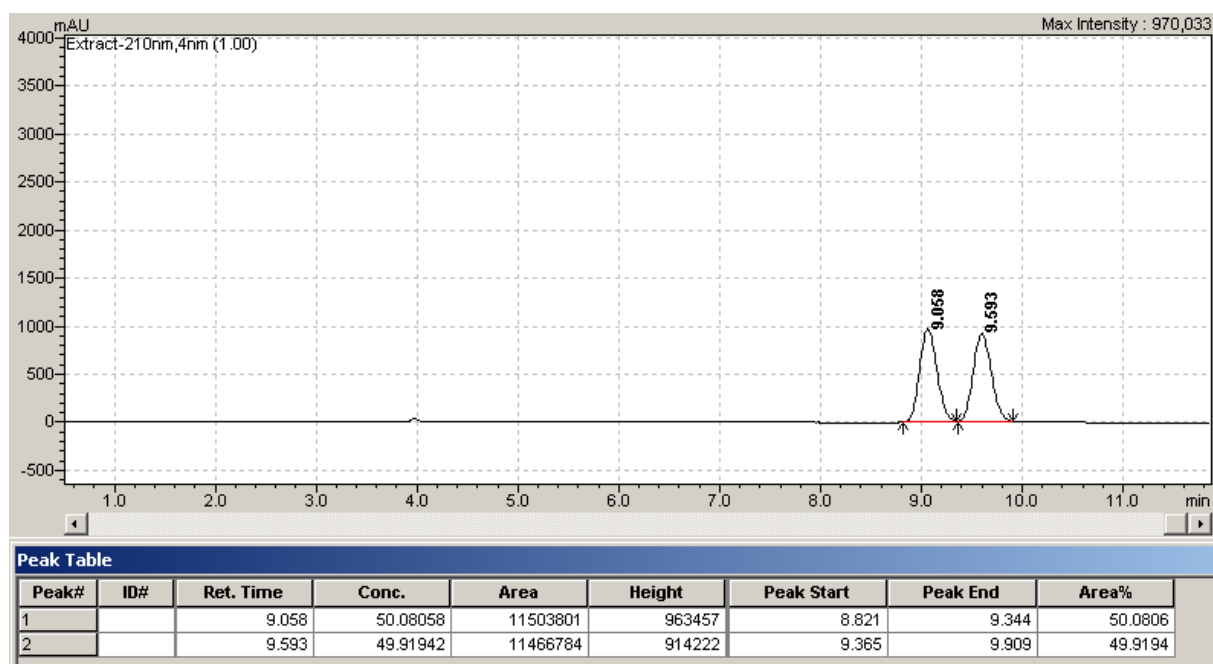

Figure S53: HPLC chromatogram of racemic product **13**.

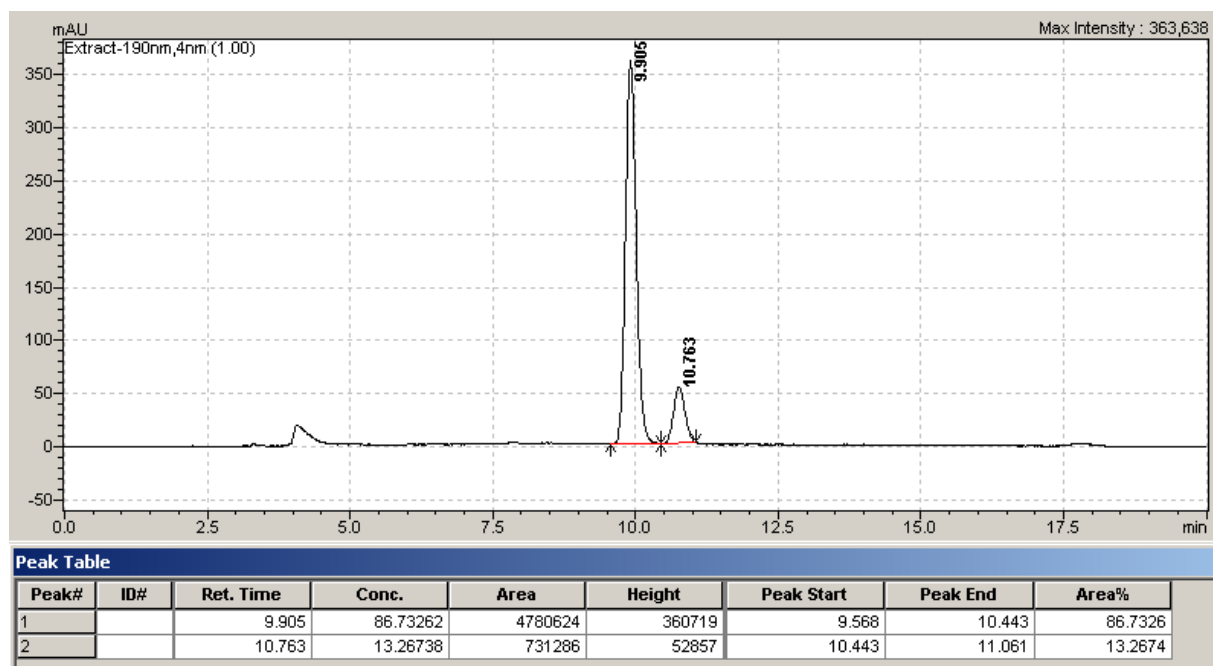

Figure S54: HPLC chromatogram of chiral product **13** (catalyst **8a**).

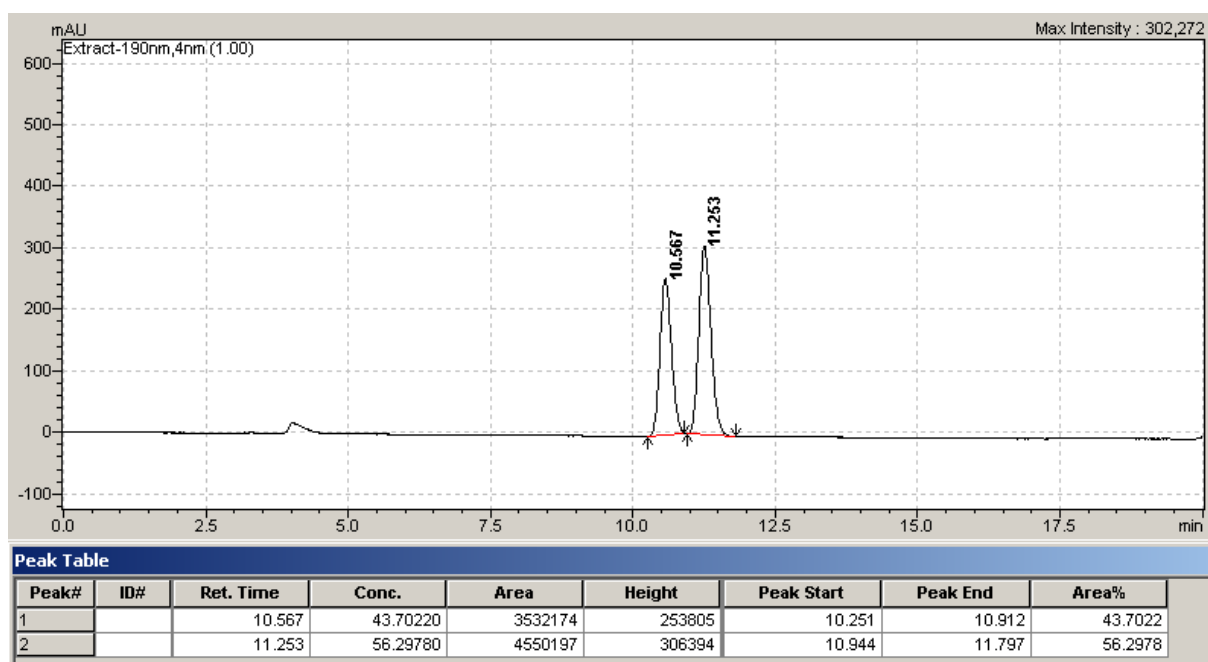

**Figure S55:** HPLC chromatogram of chiral product **13** (catalyst **8b**).

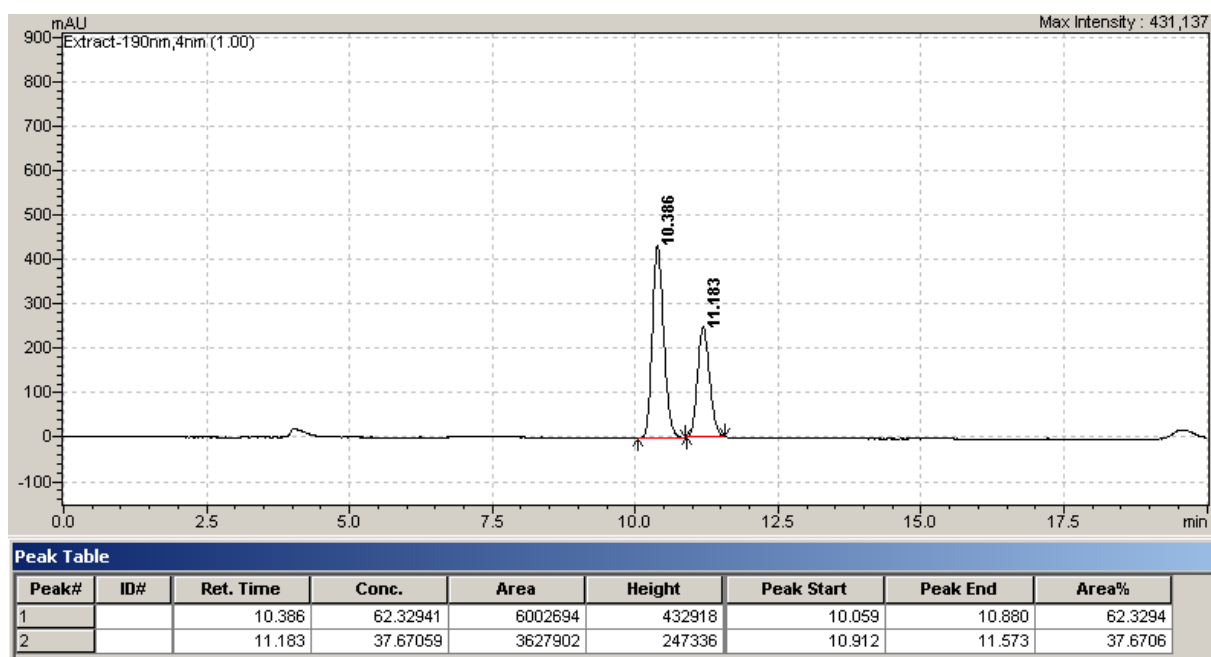

**Figure S56:** HPLC chromatogram of chiral product **13** (catalyst **8c**).

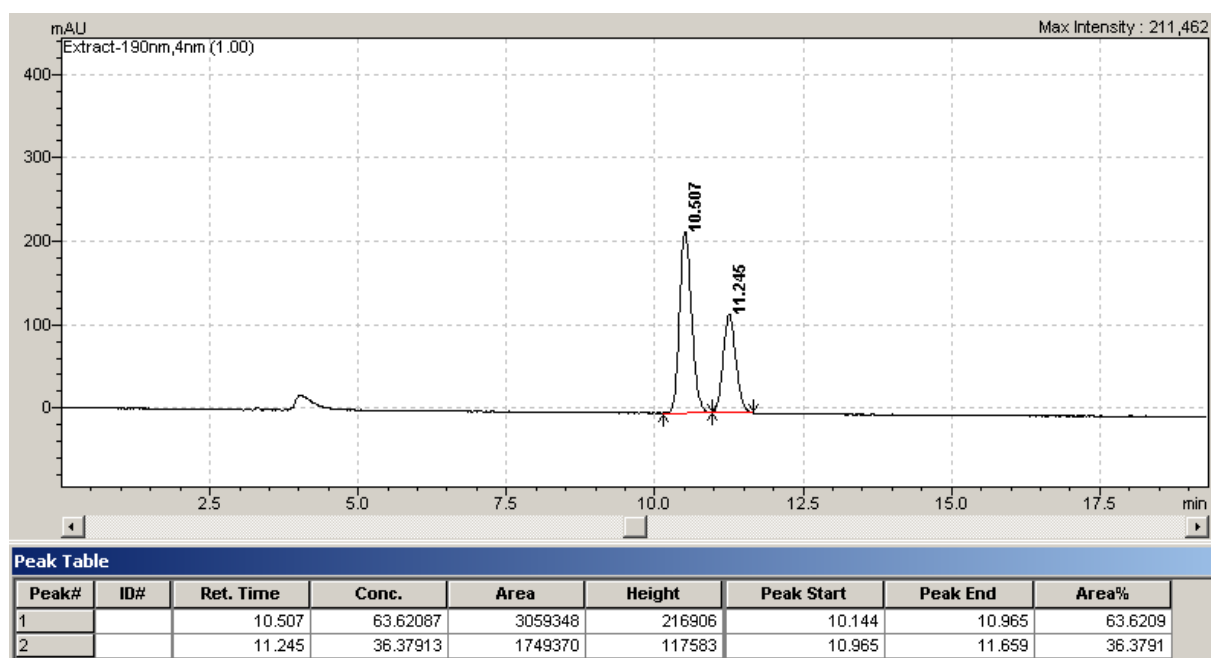

**Figure S57:** HPLC chromatogram of chiral product **13** (catalyst **8d**).

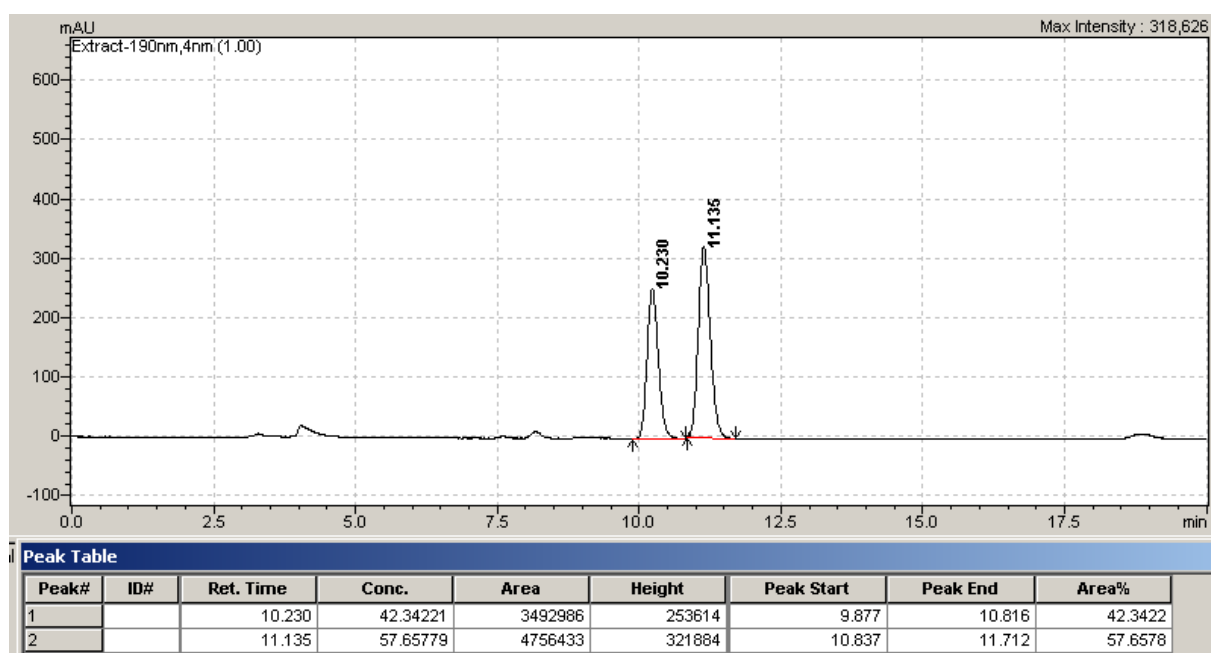

**Figure S58:** HPLC chromatogram of chiral product **13** (catalyst **9a**).

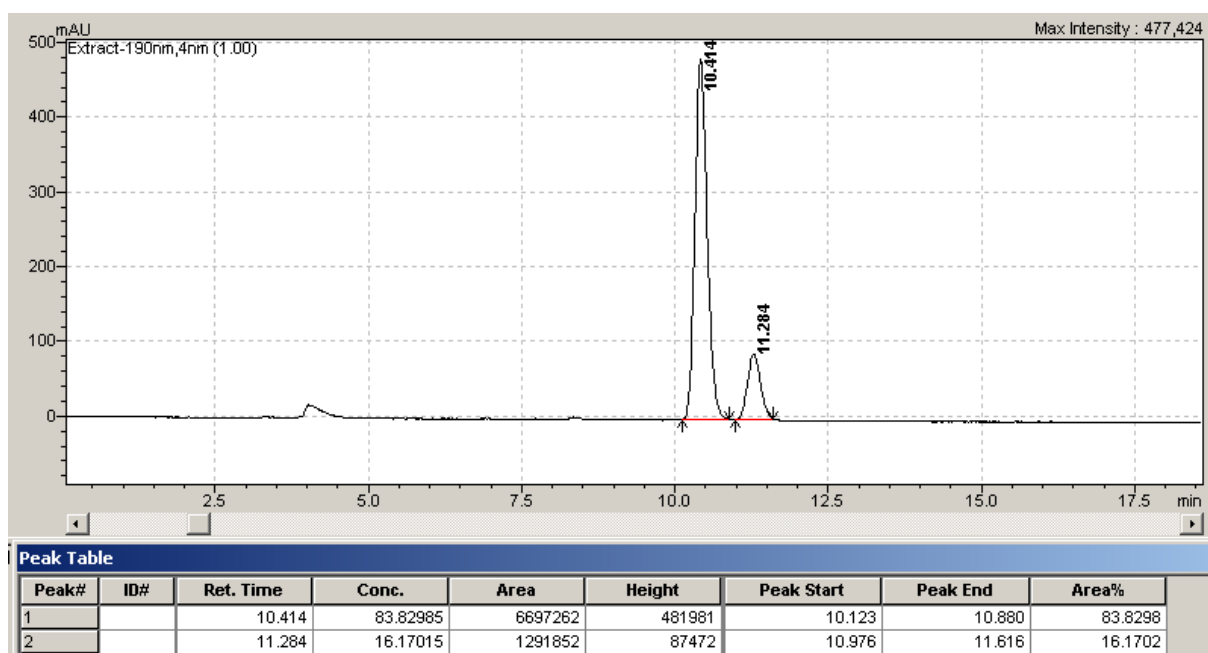

**Figure S59:** HPLC chromatogram of chiral product **13** (catalyst **9b**).

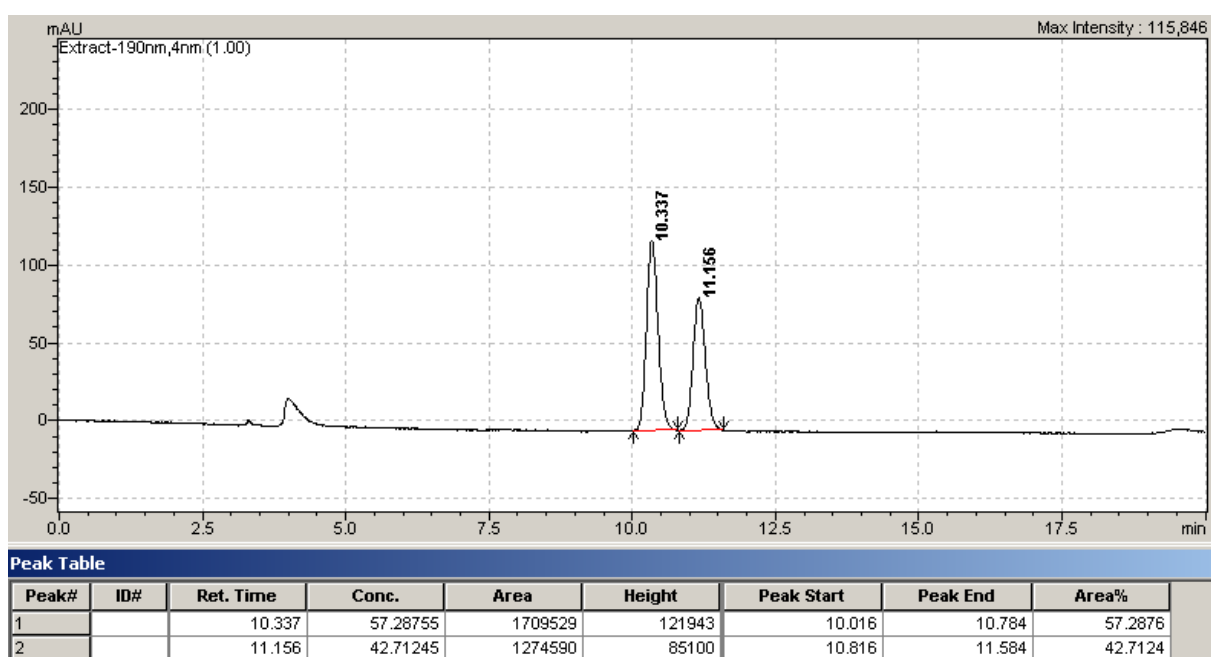

**Figure S60:** HPLC chromatogram of chiral product **13** (catalyst **9c**).

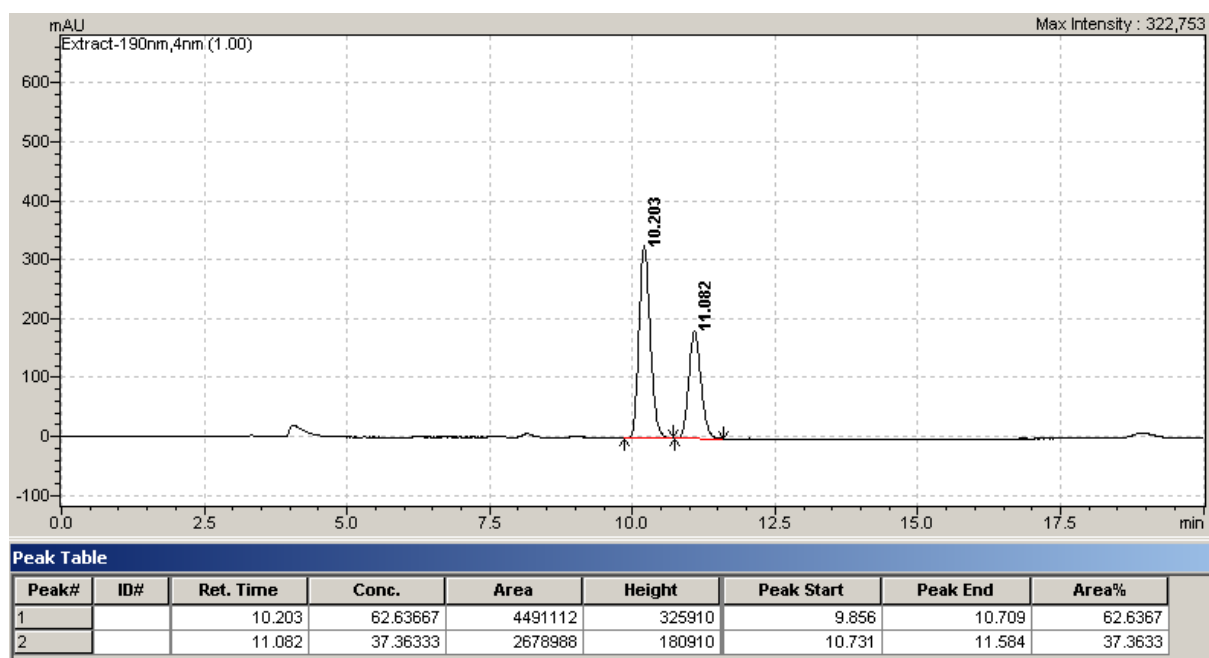

**Figure S61:** HPLC chromatogram of chiral product **13** (catalyst **9d**).

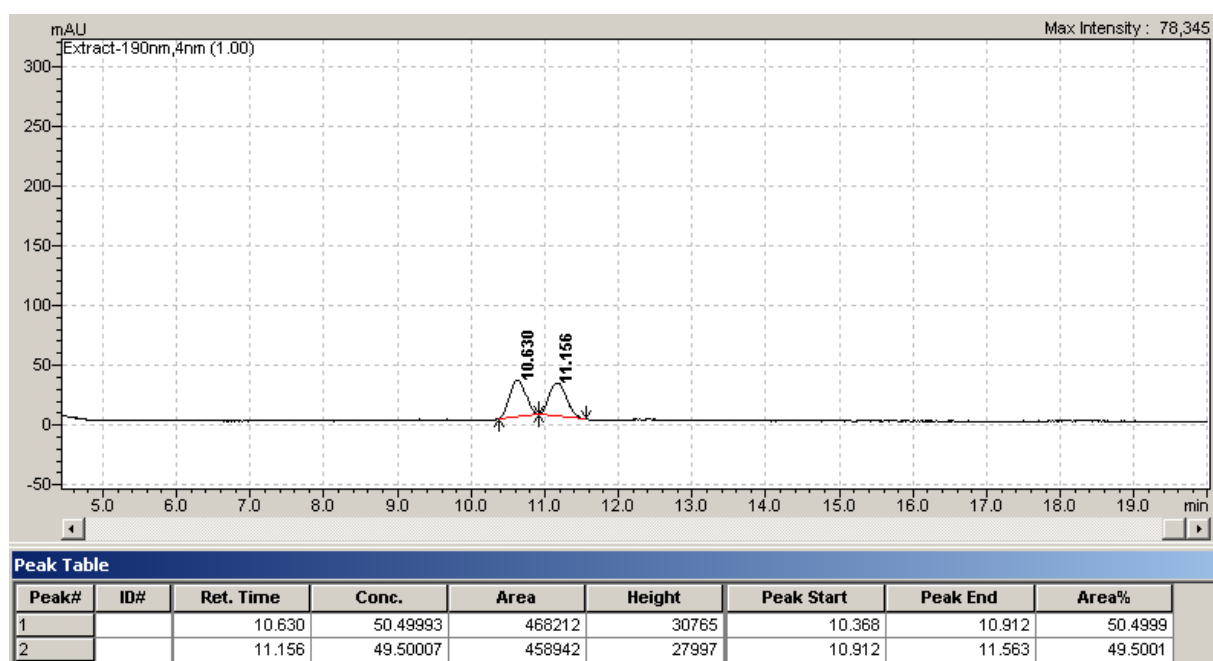

**Figure S62:** HPLC chromatogram of chiral product **13** (catalyst **4a**).

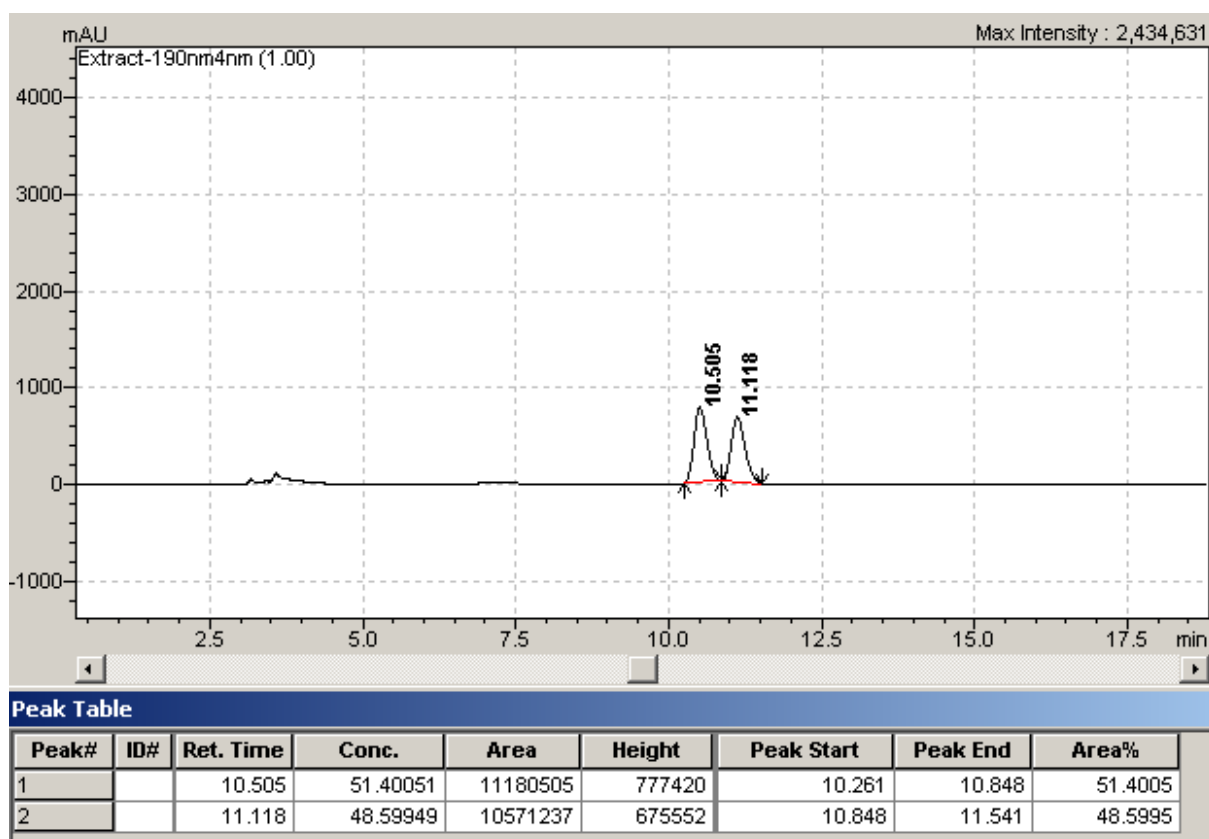

**Figure S63:** HPLC chromatogram of chiral product **13** (catalyst **4b**).

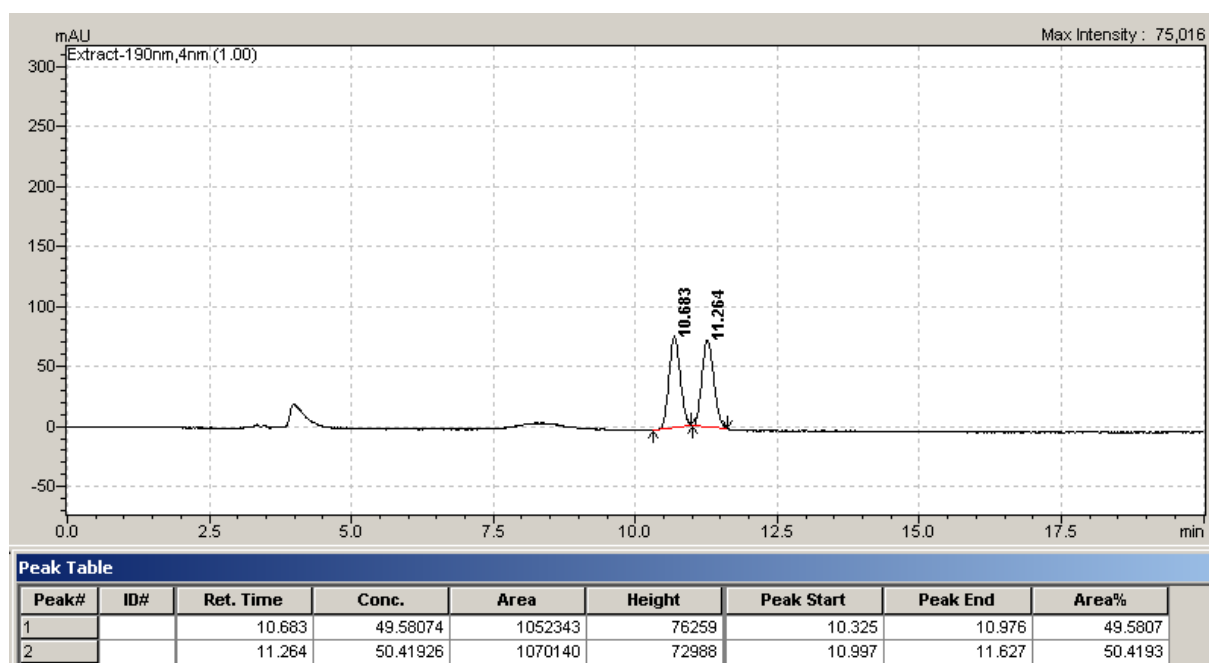

**Figure S64:** HPLC chromatogram of chiral product **13** (catalyst **4c**).

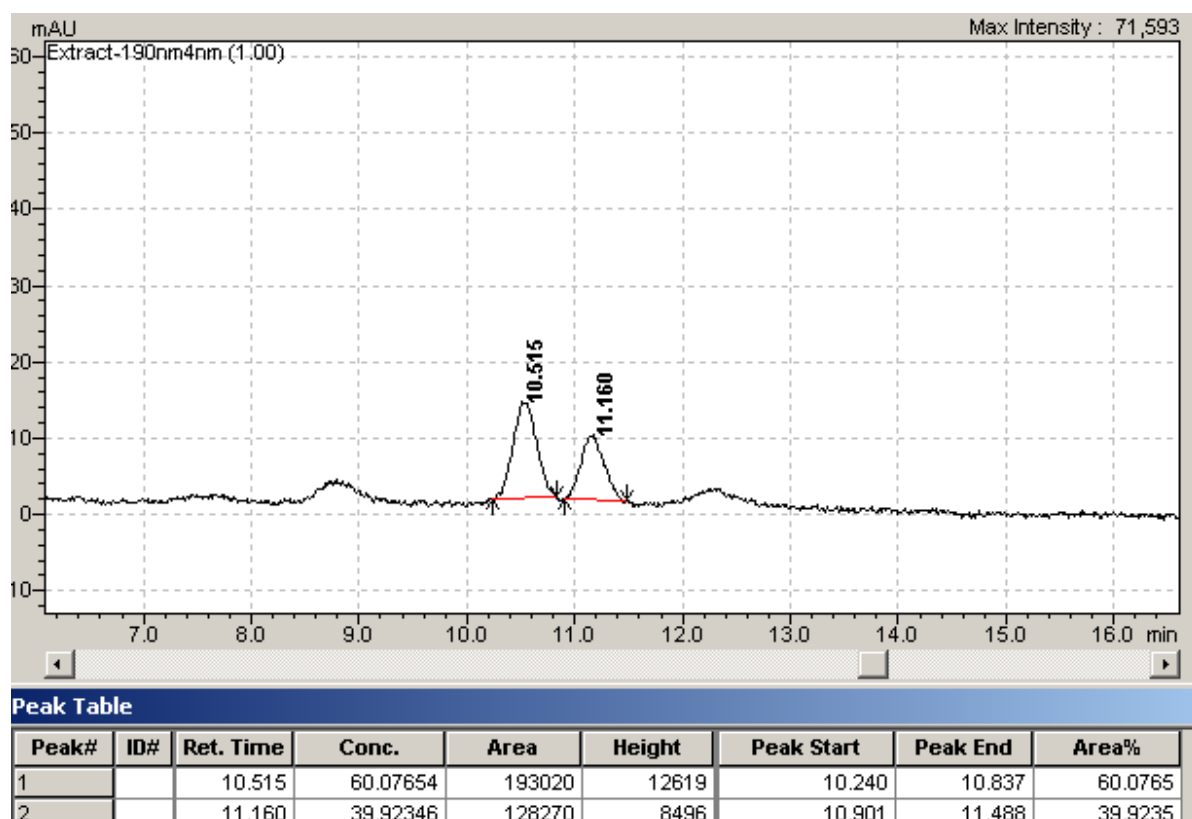

**Figure S65:** HPLC chromatogram of chiral product **13** (catalyst **4d**).

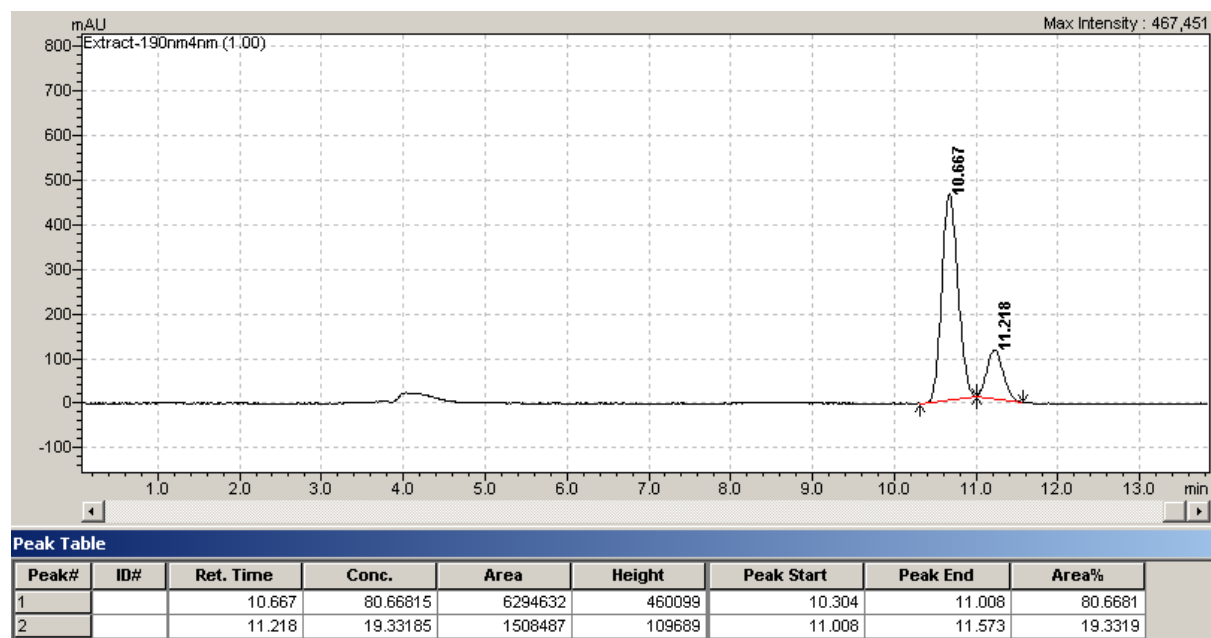

**Figure S66:** HPLC chromatogram of chiral product **13** (catalyst **5a**).

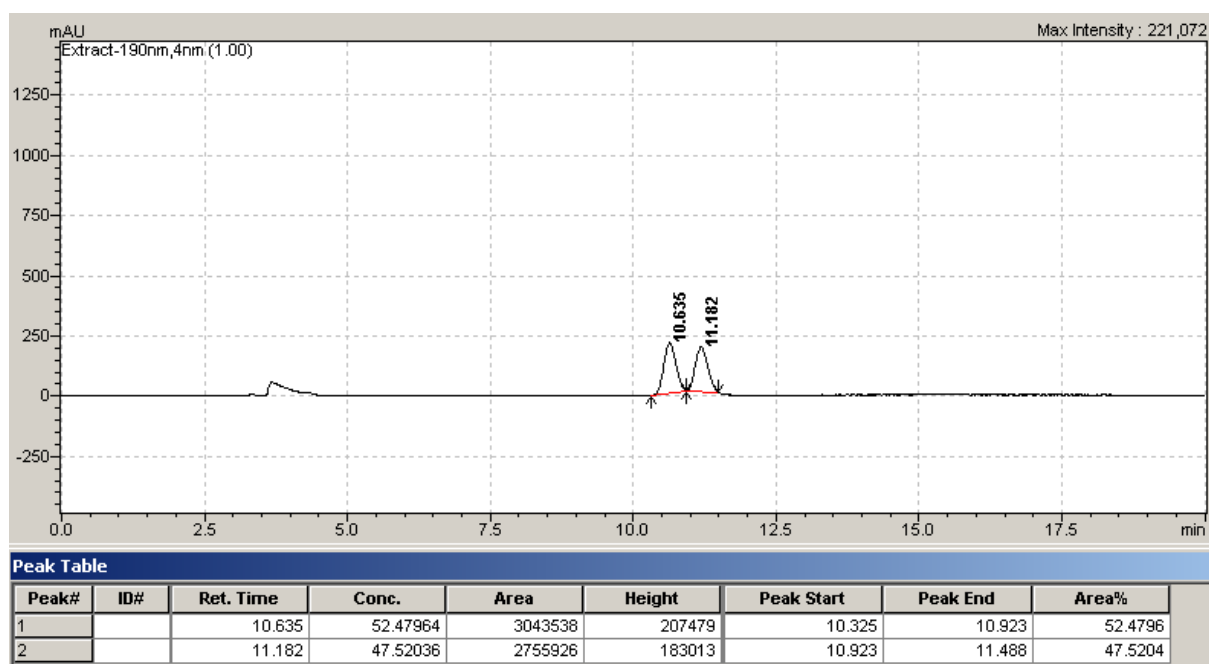

**Figure S67:** HPLC chromatogram of chiral product **13** (catalyst **5b**).

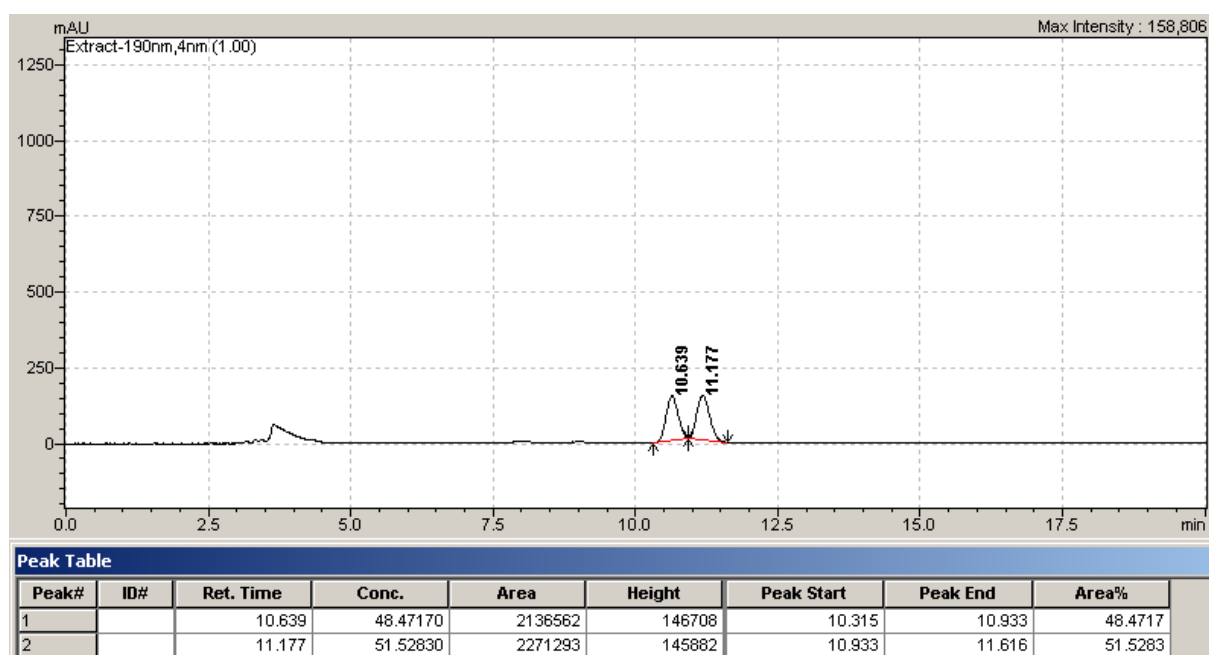

**Figure S68:** HPLC chromatogram of chiral product **13** (catalyst **5c**).

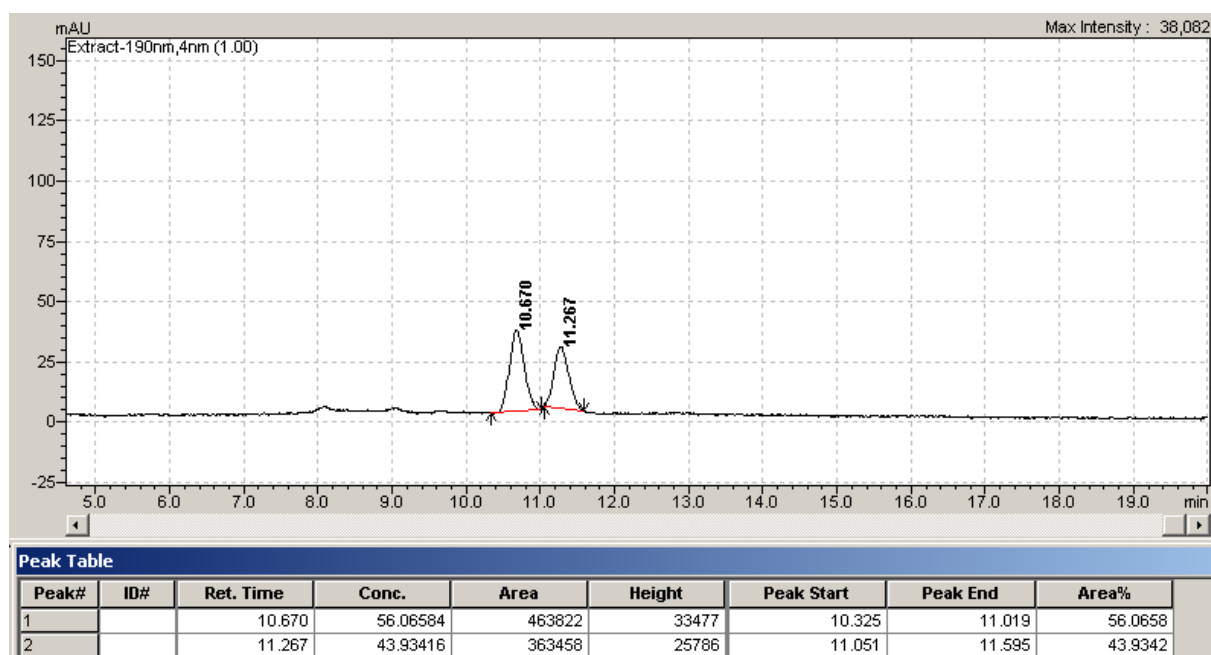

**Figure S69:** HPLC chromatogram of chiral product **13** (catalyst **5d**).
