# Supplementary material for: New α- and β-cyclodextrin derivatives with cinchona alkaloids used in asymmetric organocatalytic reactions
Source: publisher site journal article supplement (doi:10.3762/bjoc.15.80), 2019-04-01
Supplement: Additional file 3 [file 1860-5397-15-80-S3.pdf]

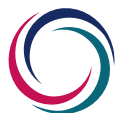

## Supporting Information

for

### **New $\alpha$ - and $\beta$ -cyclodextrin derivatives with cinchona alkaloids used in asymmetric organocatalytic reactions**

Iveta Chena Tichá, Simona Hybelbauerová and Jindřich Jindřich

*Beilstein J. Org. Chem.* **2019**, *15*, 830–839. doi:10.3762/bjoc.15.80

### **2D NMR spectra of compounds 8a–d, 9a–d and 11**

## Table of contents

|                                                                                           |   |
|-------------------------------------------------------------------------------------------|---|
| 2D NMR spectra of prepared CD derivatives <b>8a–d</b> , <b>9a–d</b> , and <b>11</b> ..... | 2 |
|-------------------------------------------------------------------------------------------|---|

## 2D NMR spectra of prepared CD derivatives 8a–d, 9a–d, and 11

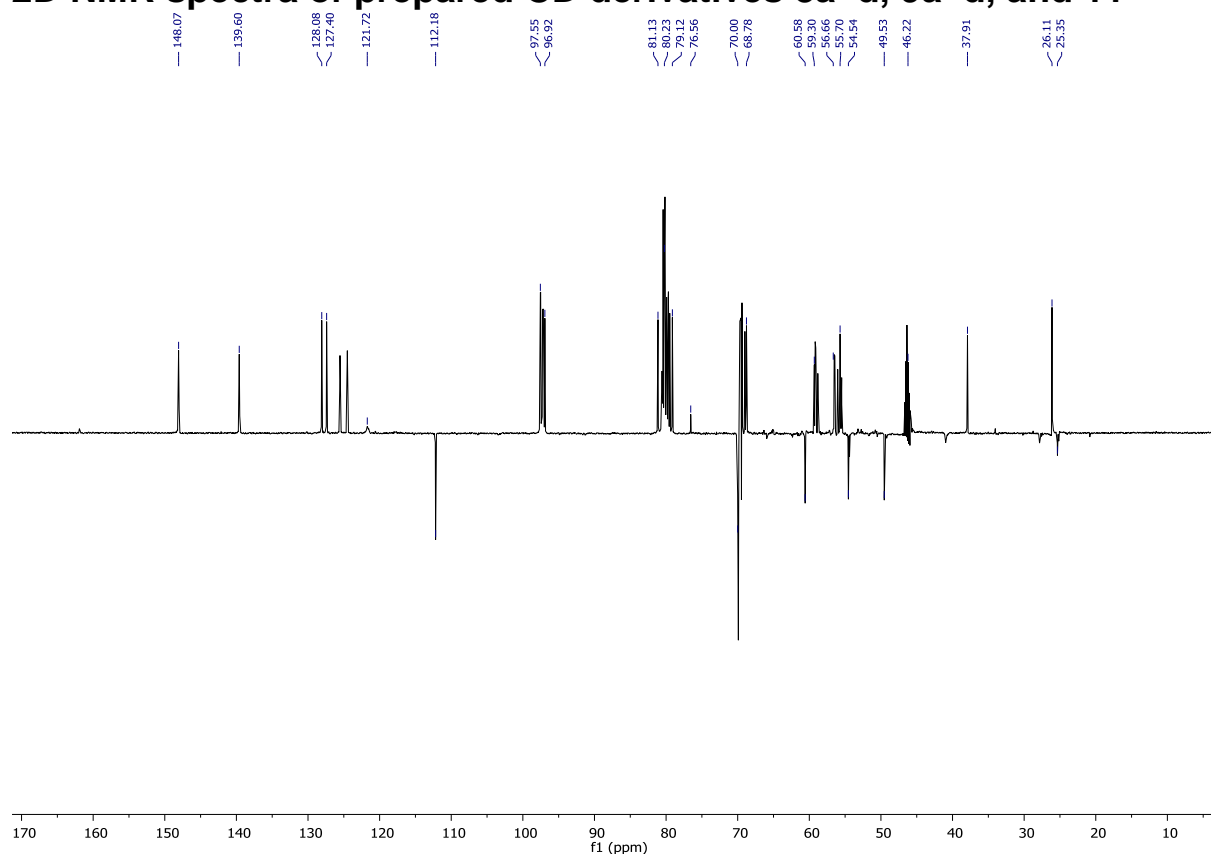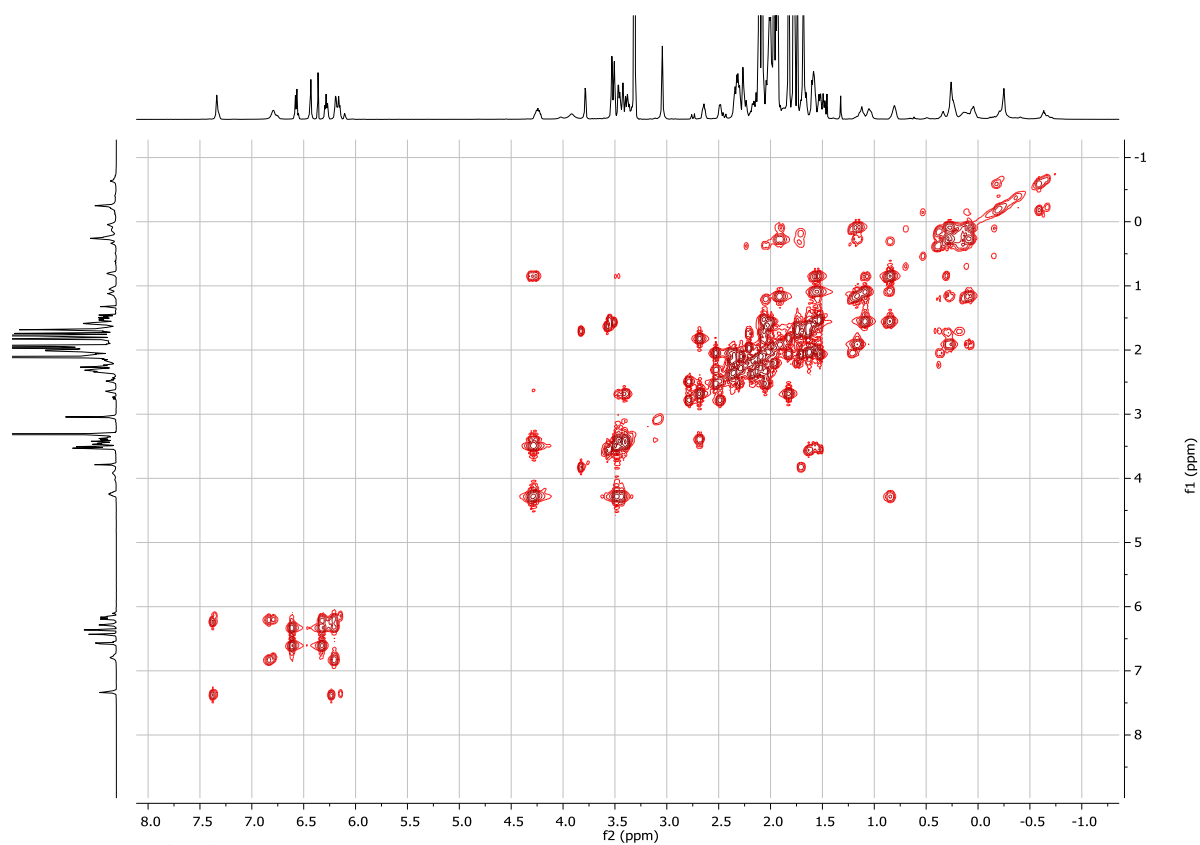

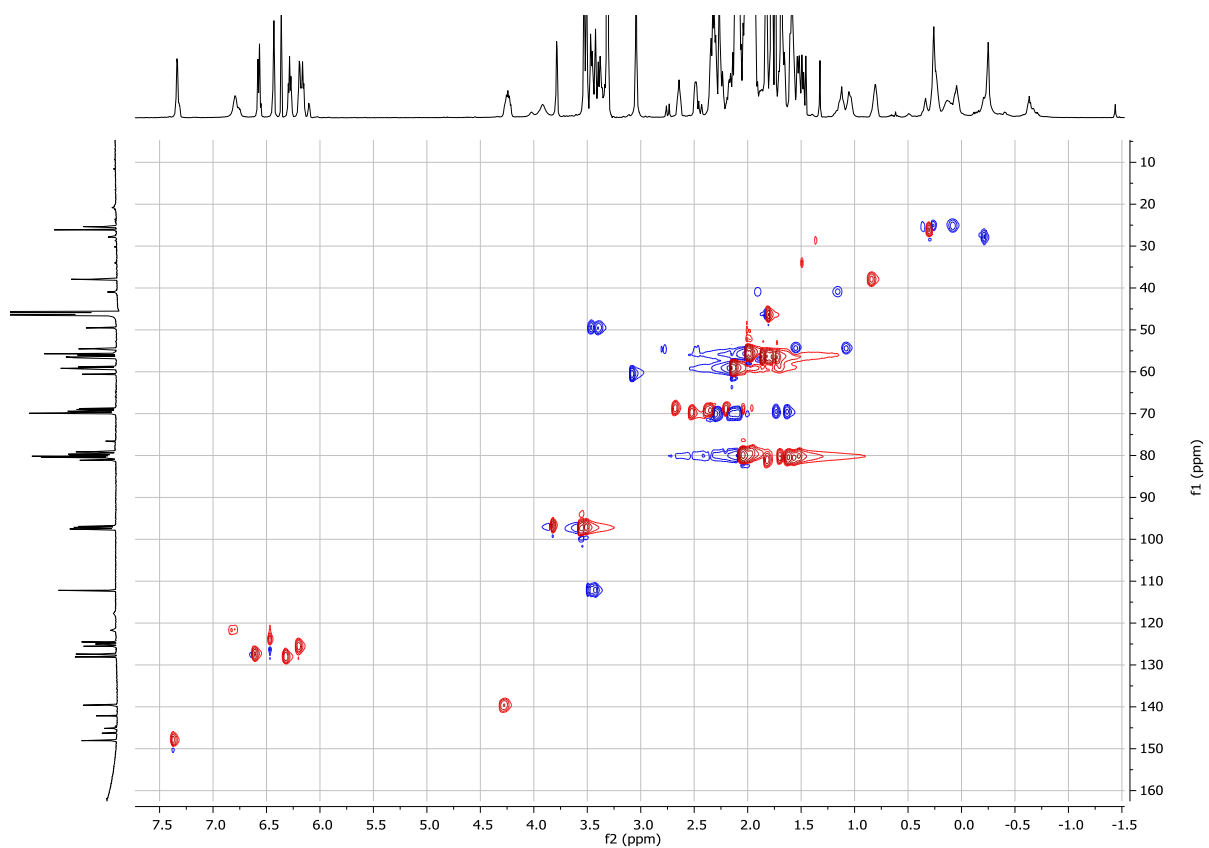

**Figure S3:** HSQC spectrum of compound **8a**.

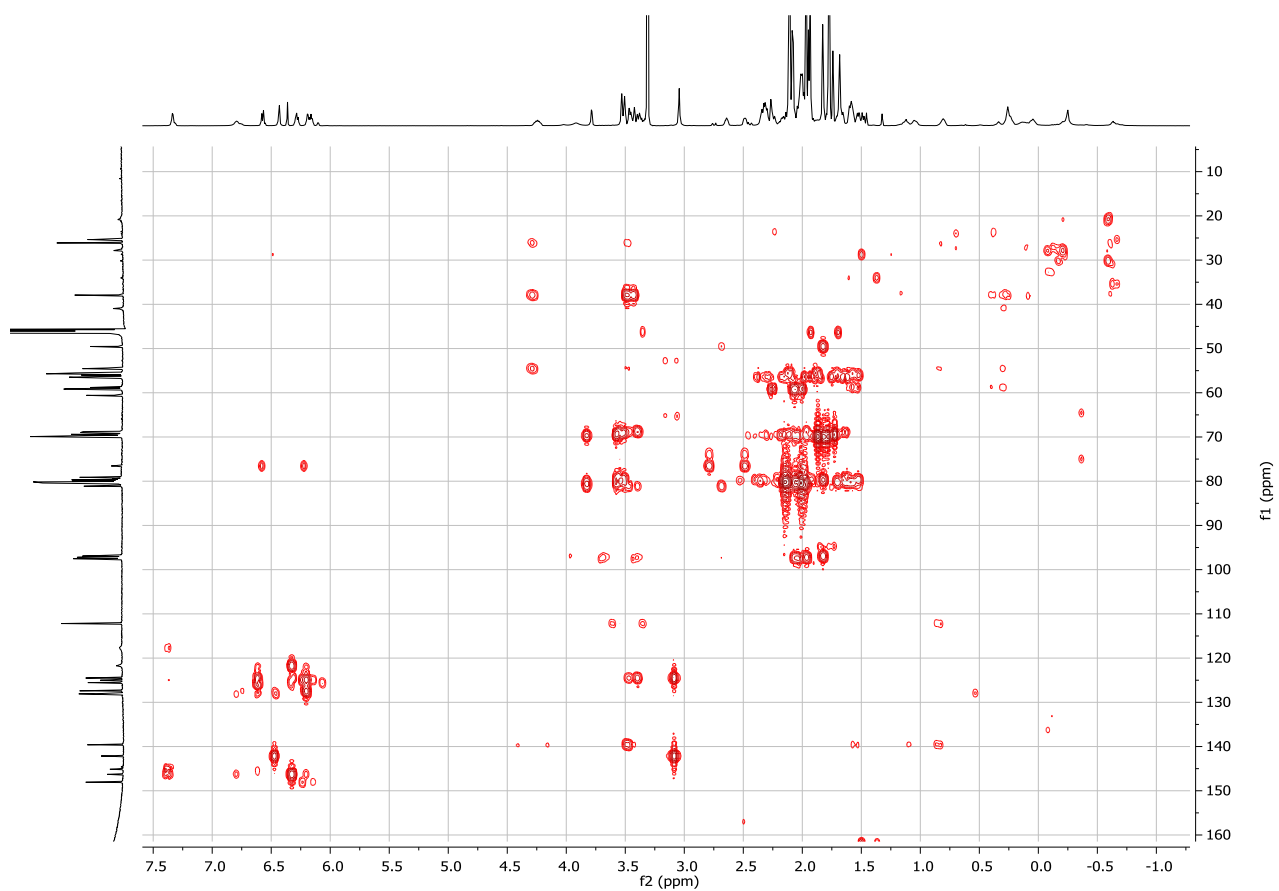

**Figure S4:** HMBC spectrum of compound **8a**.

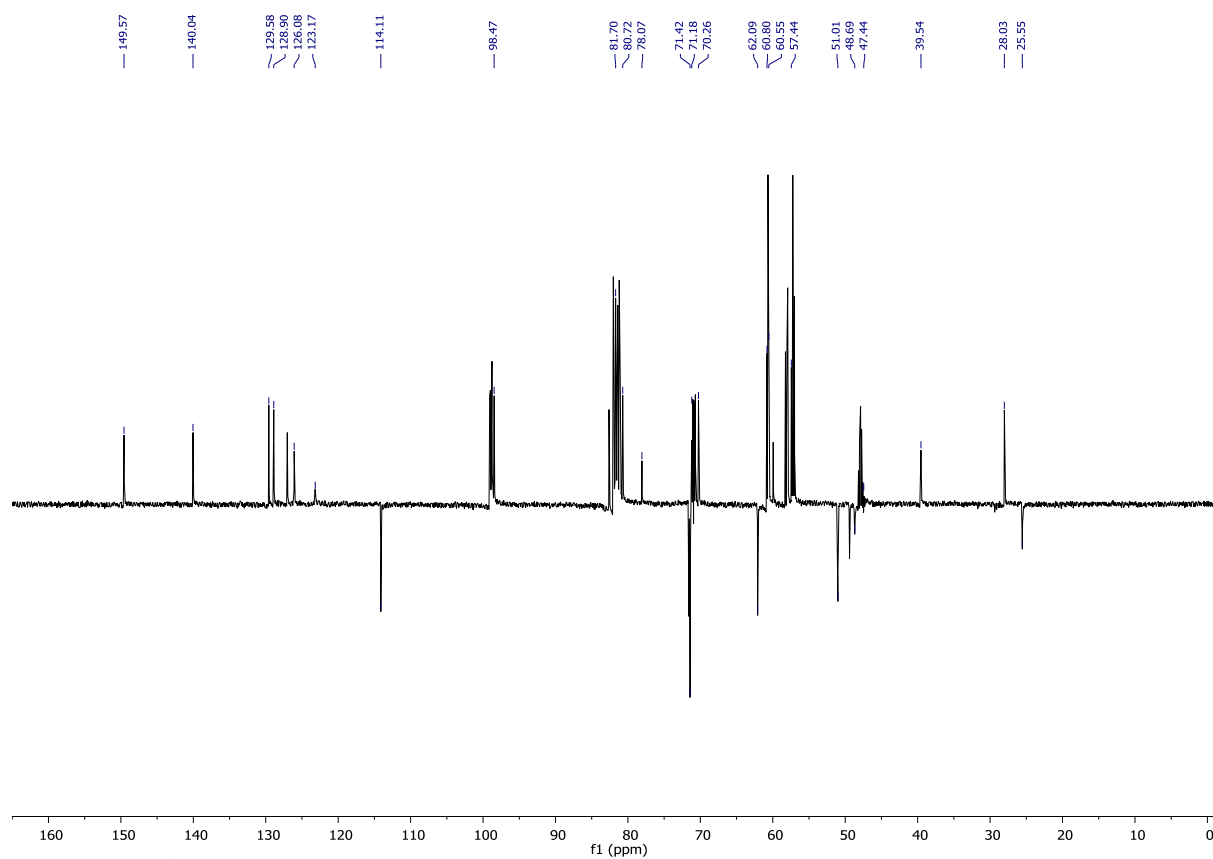

**Figure S5:**  $^{13}\text{C}$  DEPT spectrum of compound **8b**.

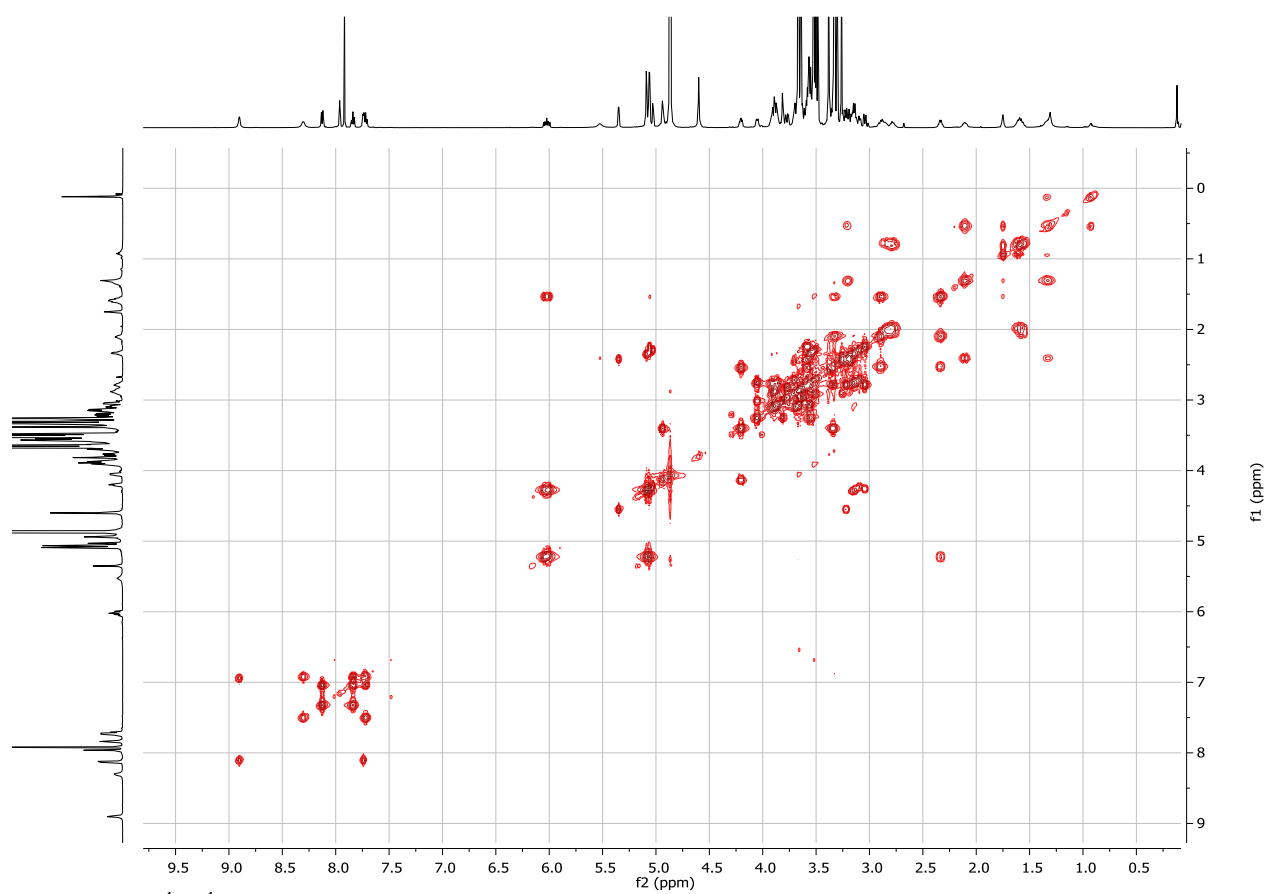

**Figure S6:**  $^1\text{H}$ - $^1\text{H}$  COSY spectrum of compound **8b**.

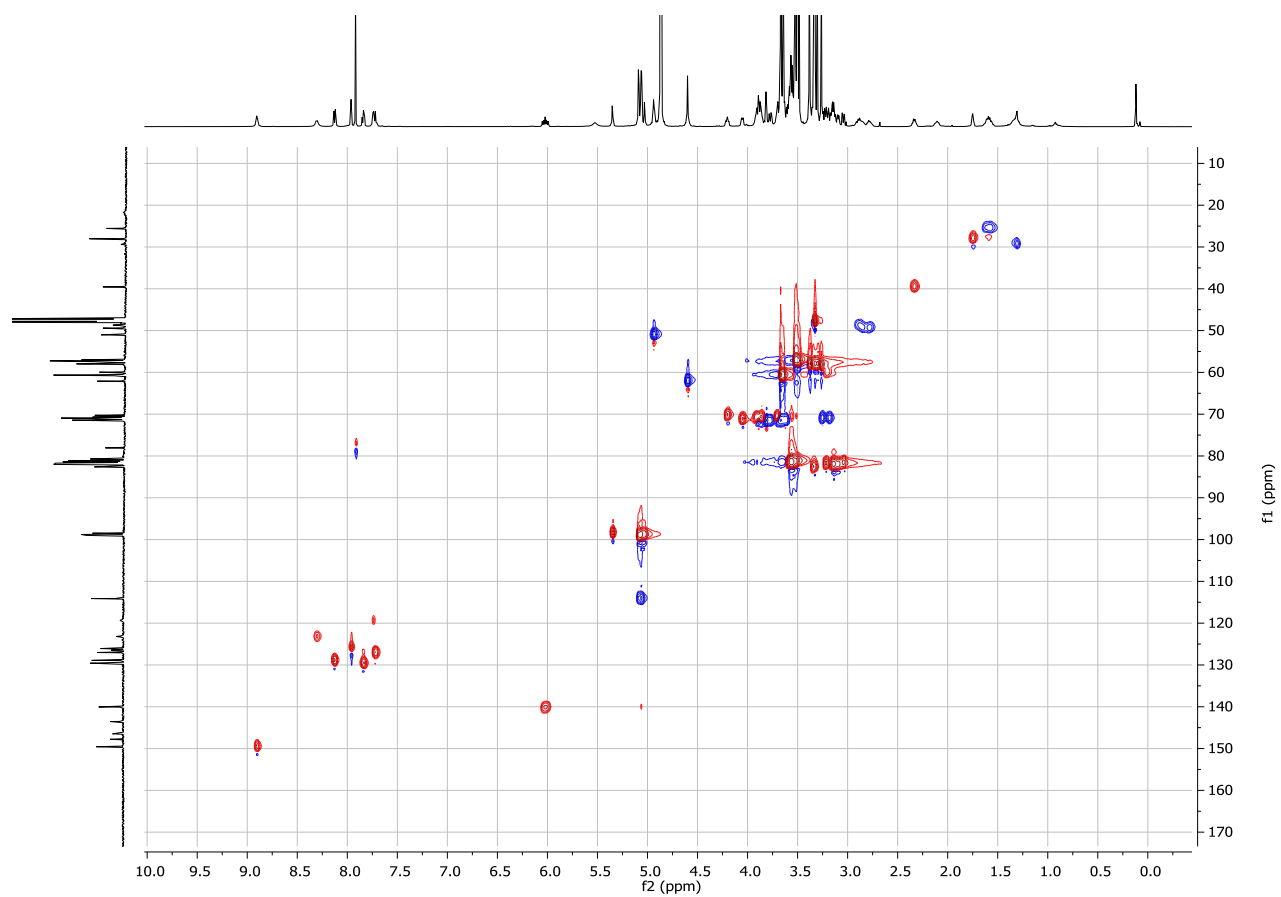

**Figure S7:** HSQC spectrum of compound **8b**.

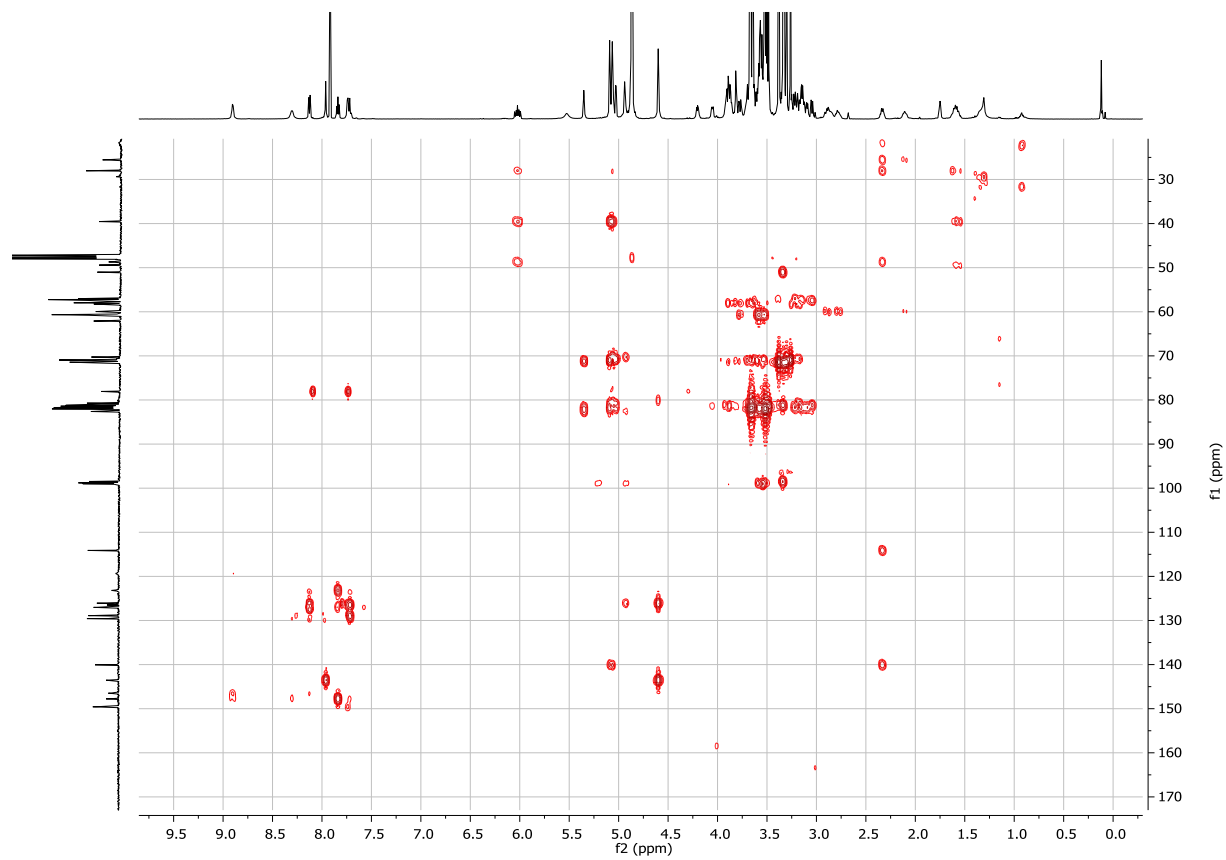

**Figure S8:** HMBC spectrum of compound **8b**.

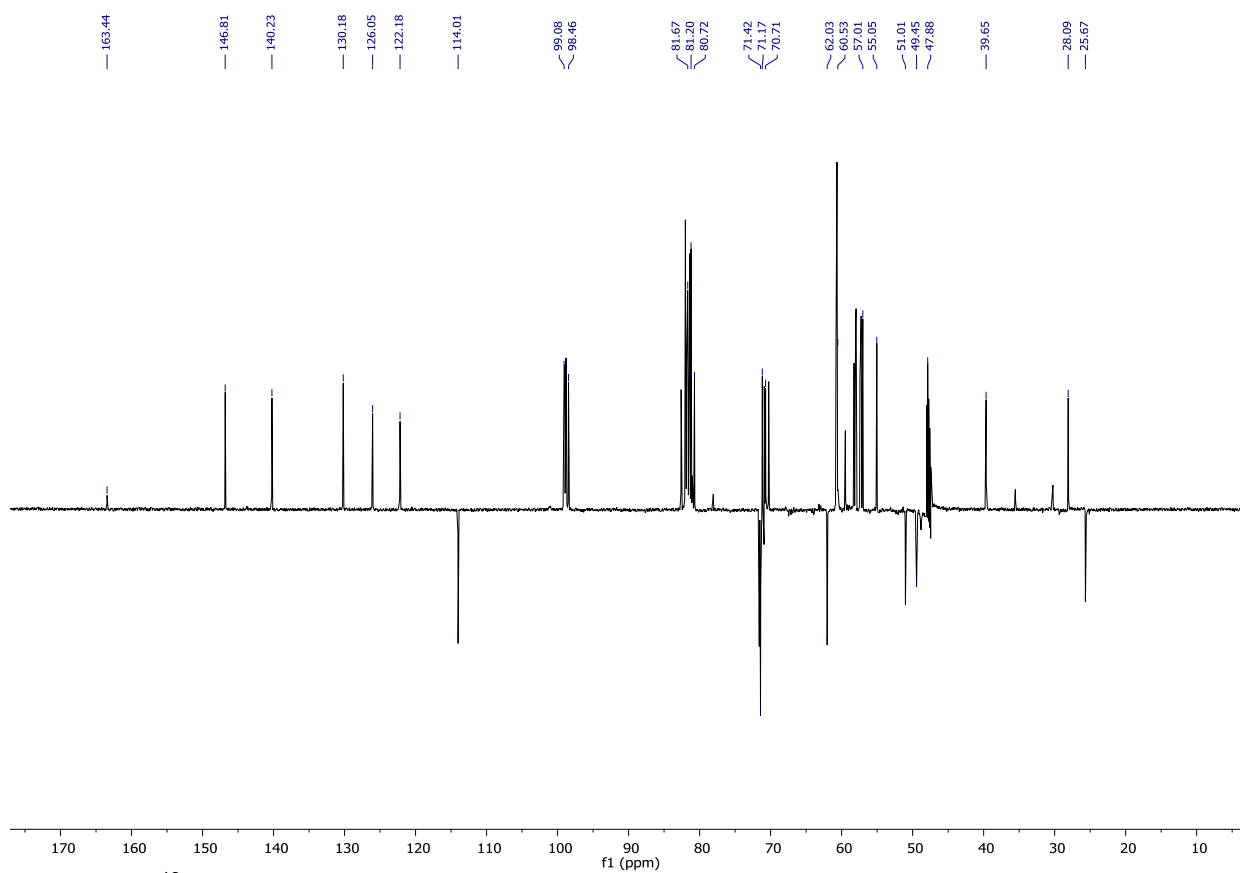

**Figure S9:**  $^{13}\text{C}$  DEPT spectrum of compound **8c**.

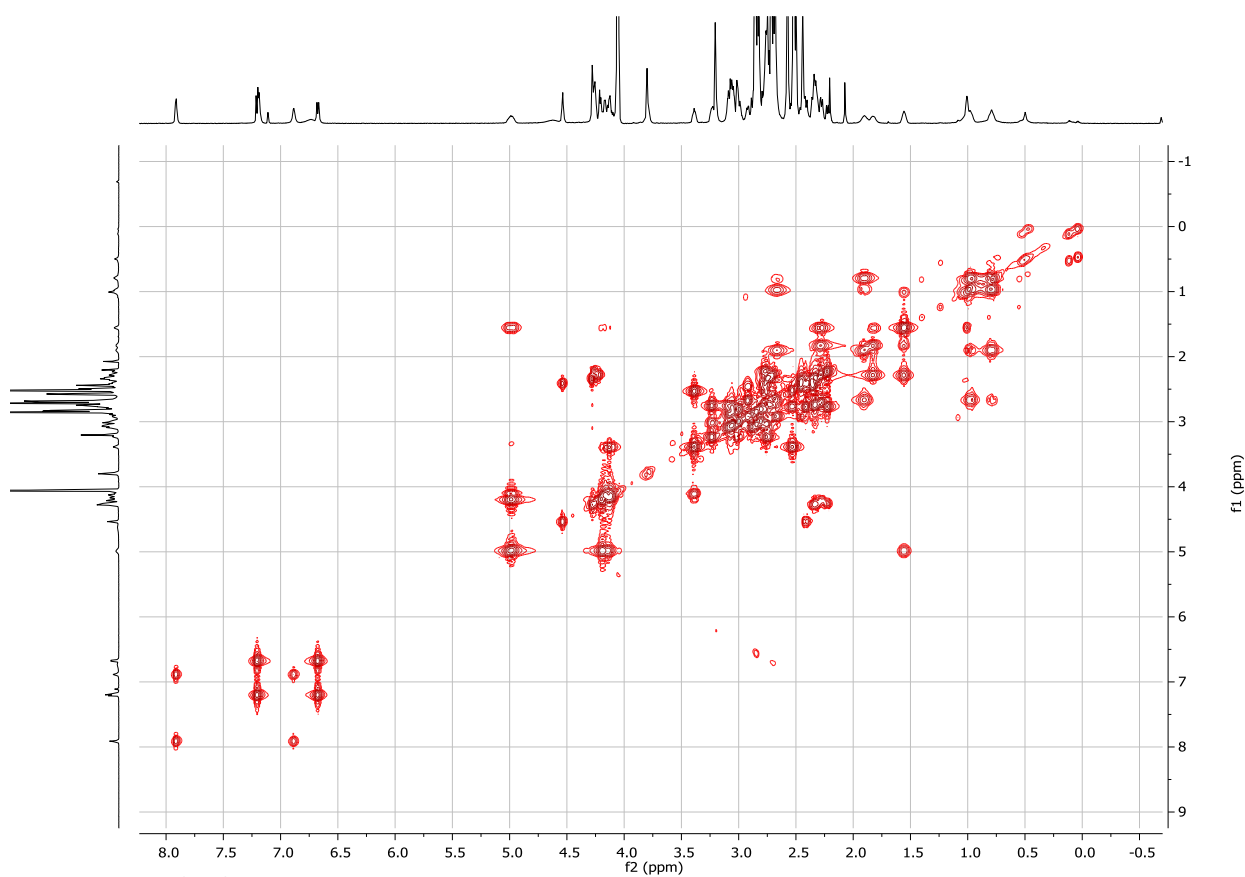

**Figure S10:**  $^1\text{H}$ - $^1\text{H}$  COSY spectrum of compound **8c**.

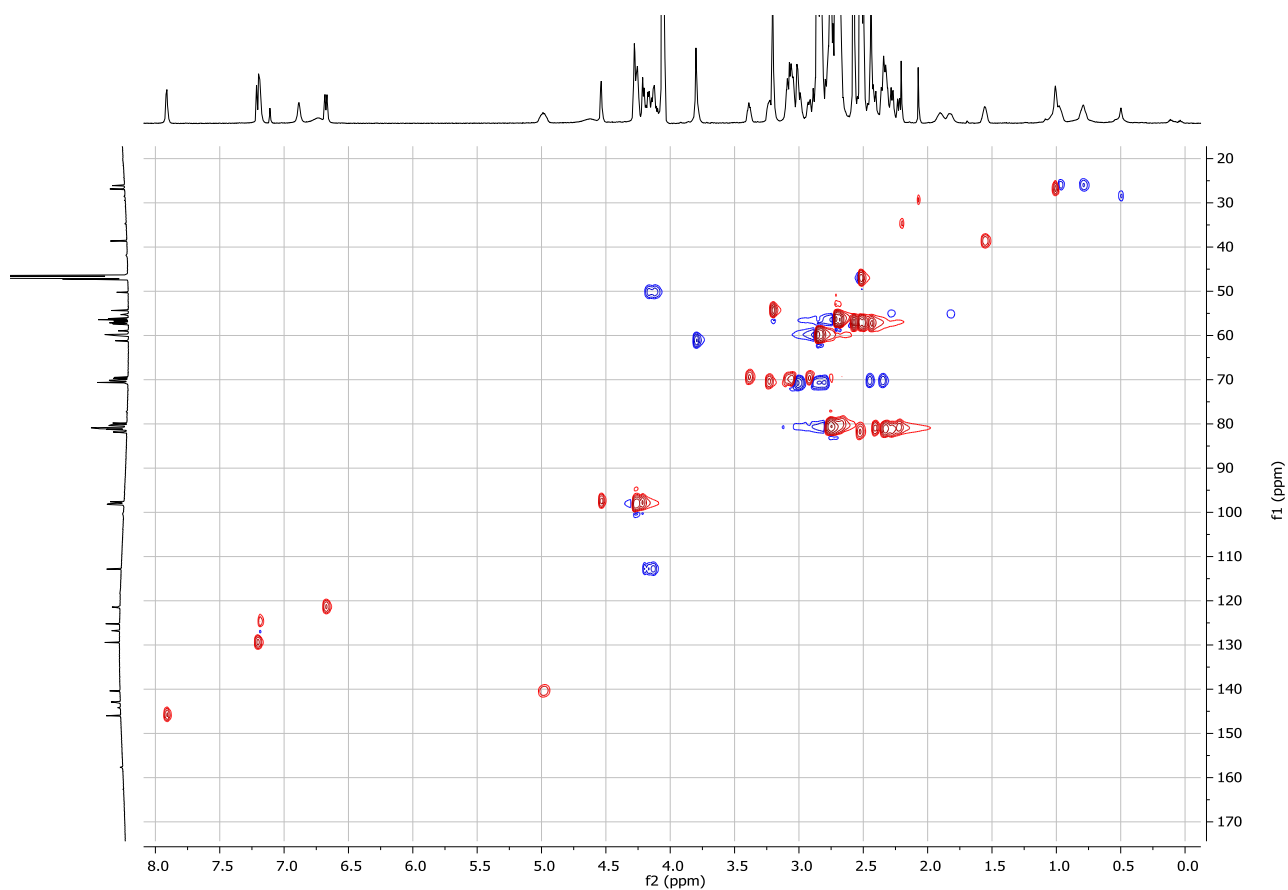

**Figure S11:** HSQC spectrum of compound **8c**.

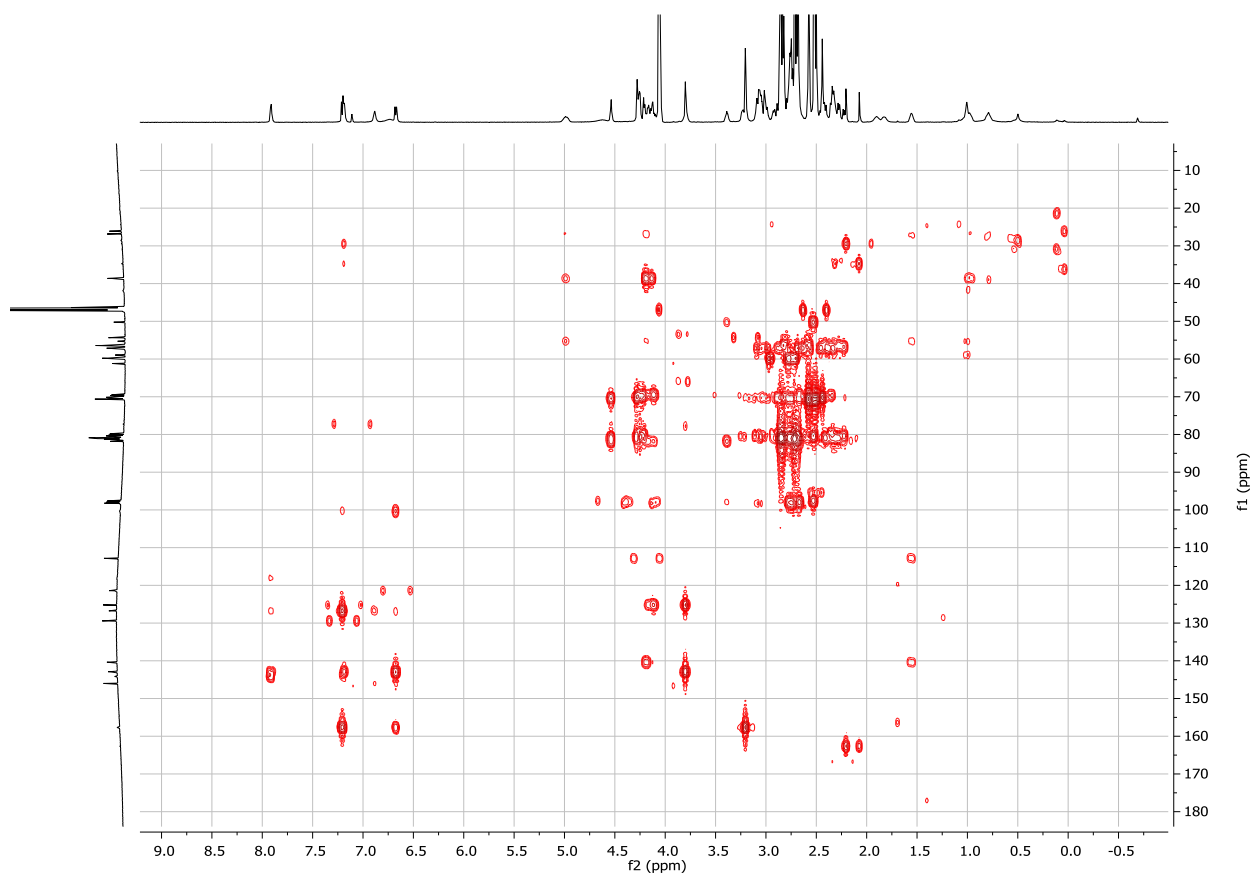

**Figure S12:** HMBC spectrum of compound **8c**.



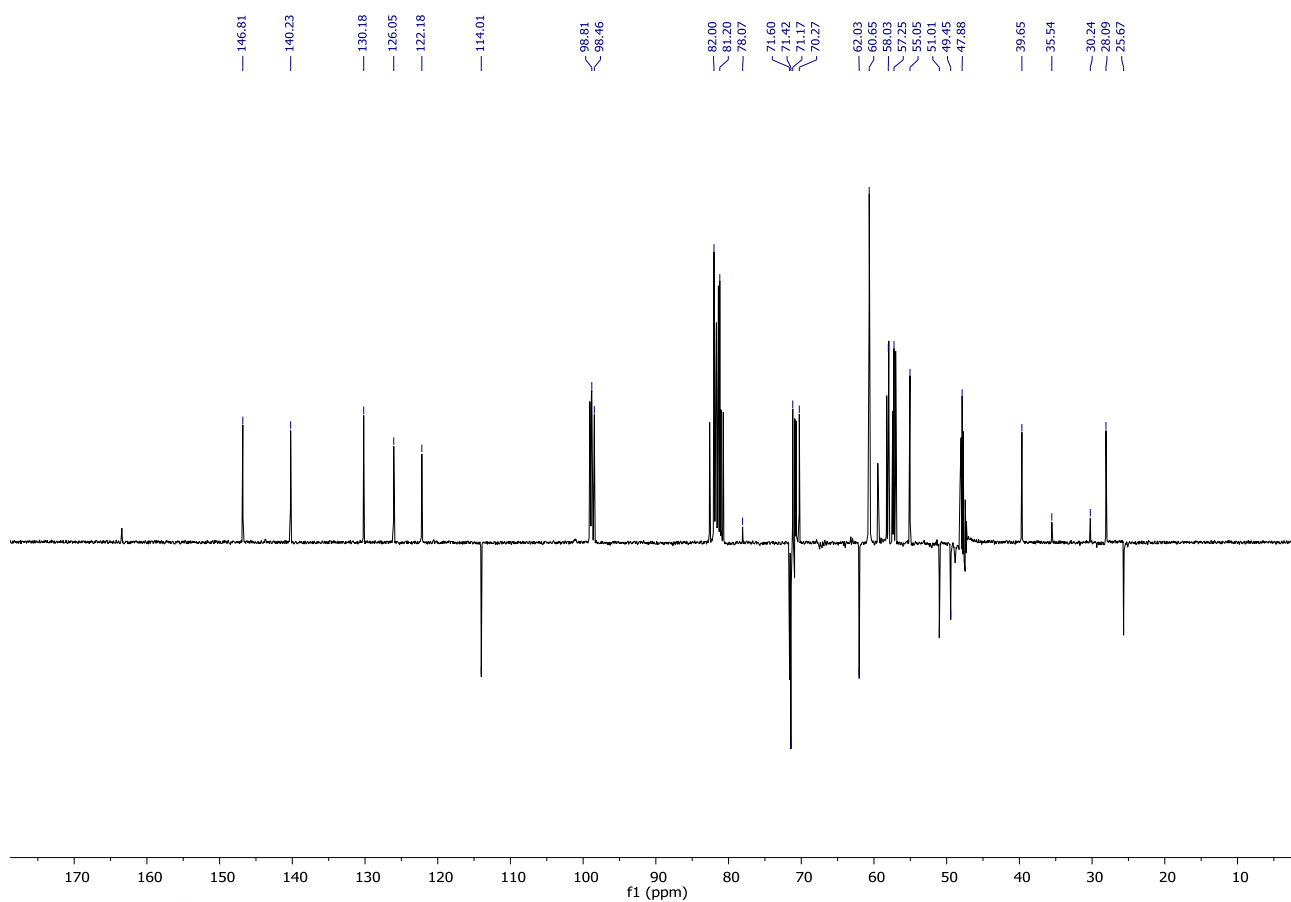

**Figure S13:**  $^{13}\text{C}$  DEPT spectrum of compound **8d**.

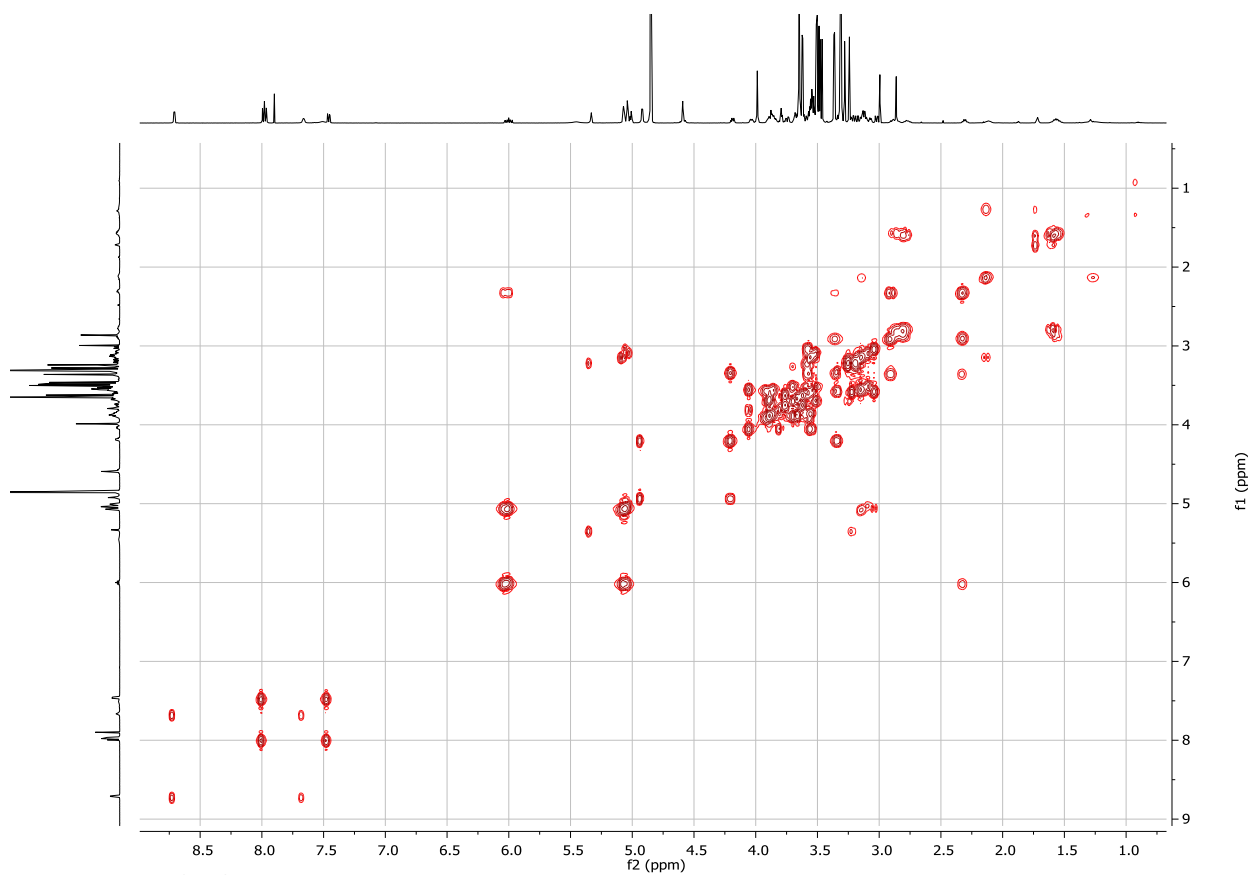

**Figure S14:**  $^1\text{H}$ - $^1\text{H}$  COSY spectrum of compound **8d**.

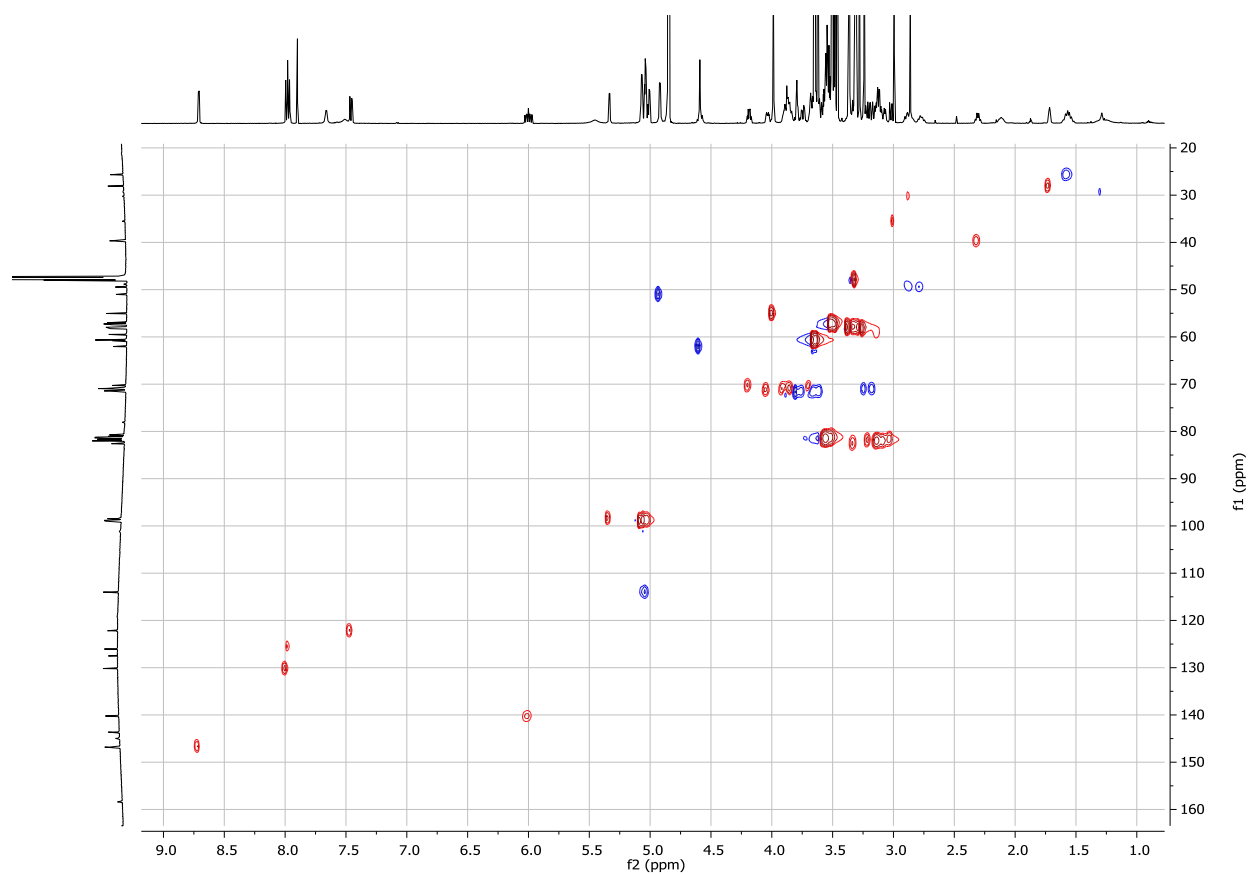

**Figure S15:** HSQC spectrum of spectrum of compound **8d**.

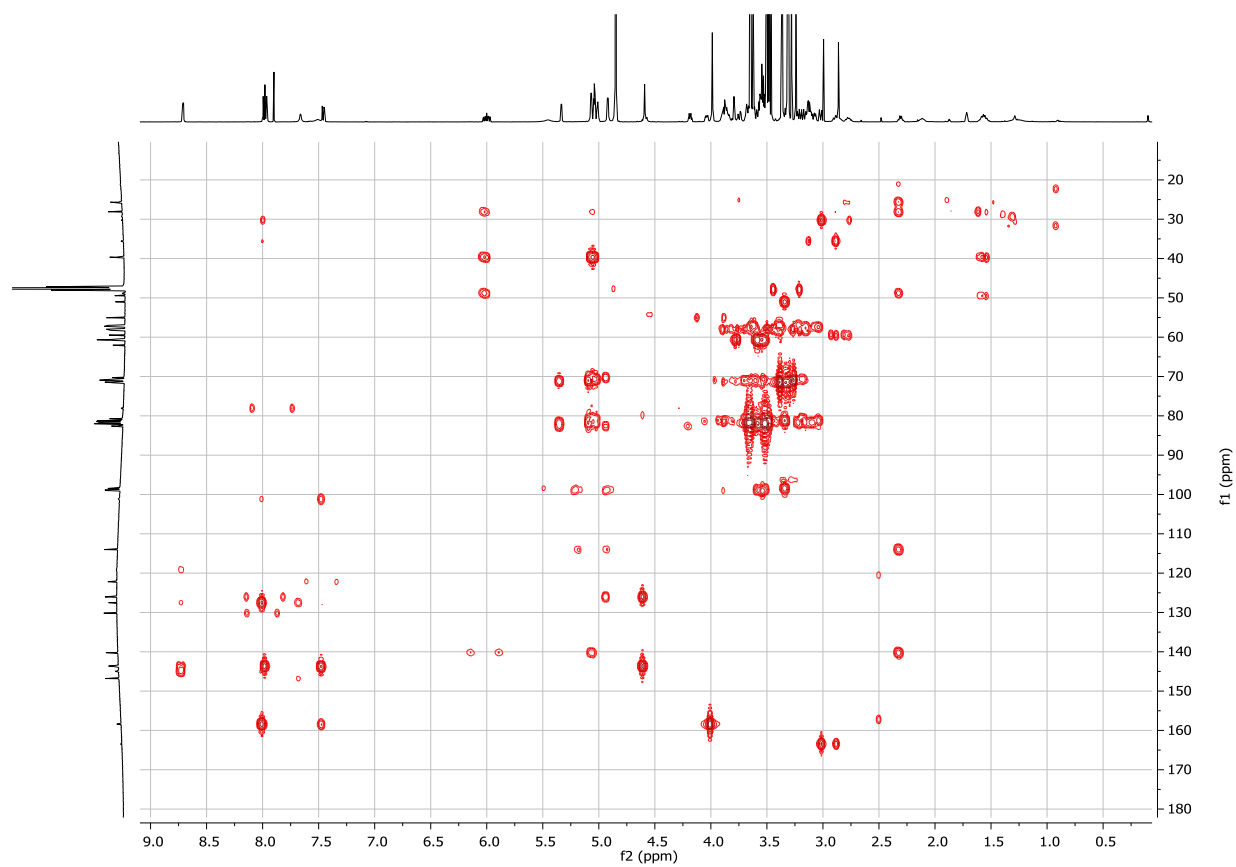

**Figure S16:** HMBC spectrum of spectrum of compound **8d**.

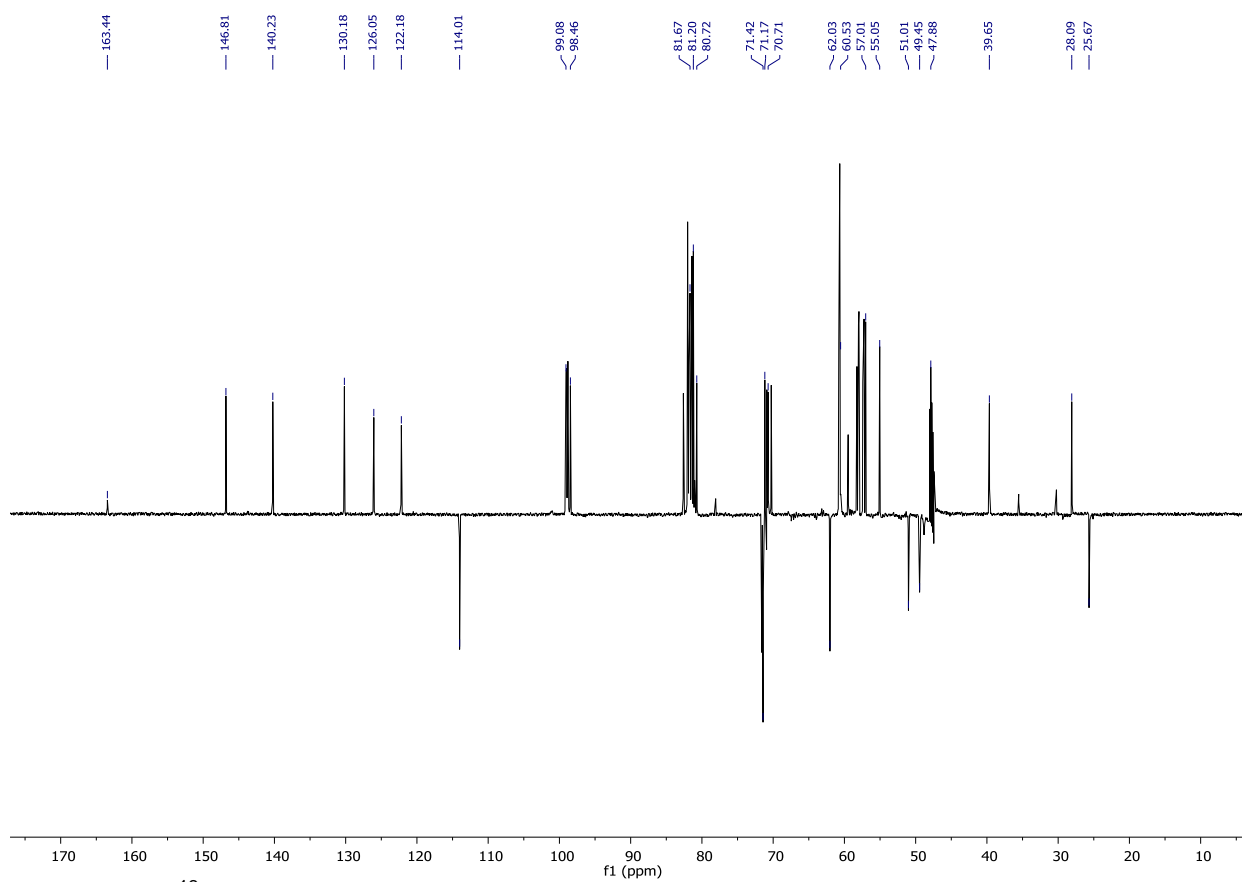

**Figure S17:**  $^{13}\text{C}$  DEPT spectrum of compound **9a**.

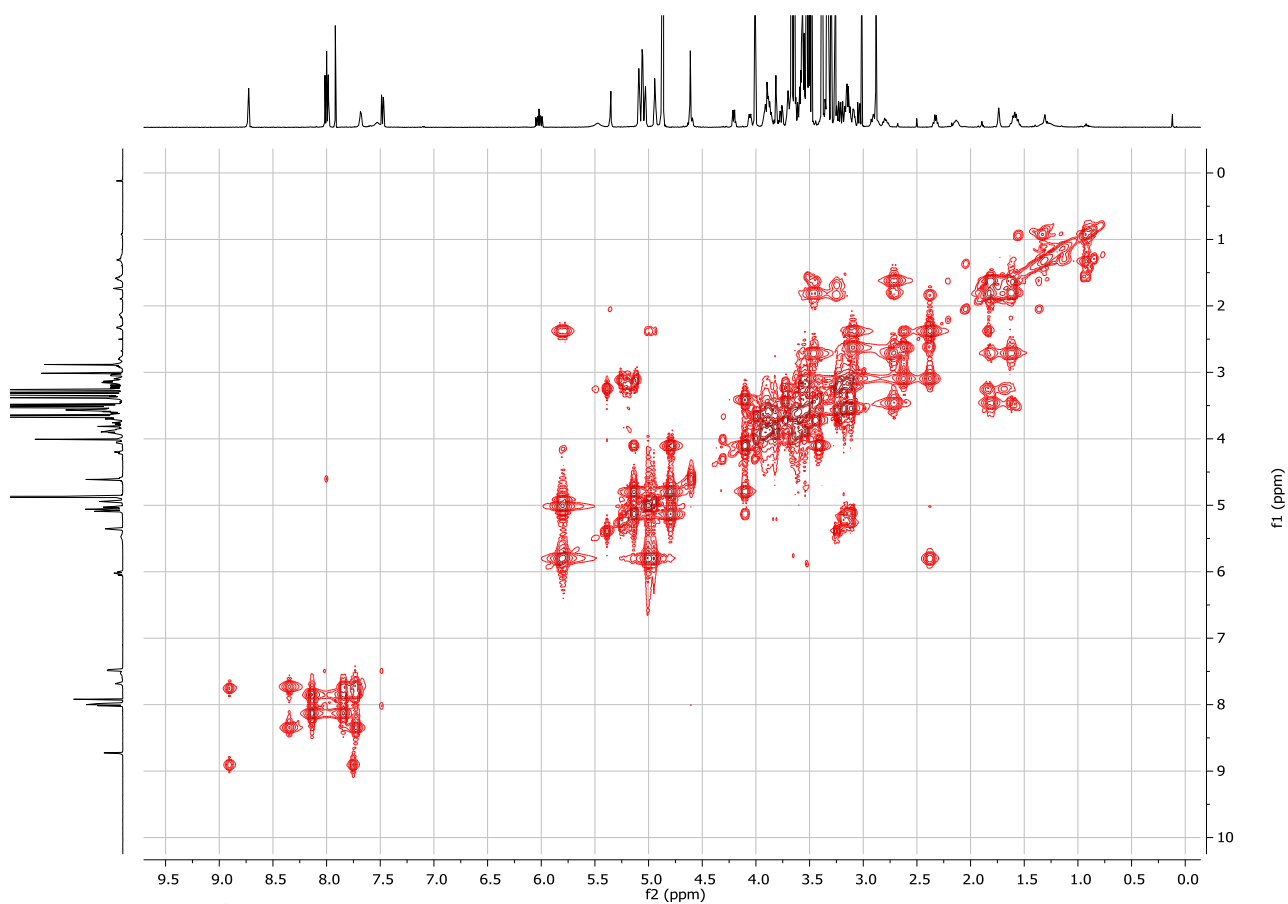

**Figure S18:**  $^1\text{H}$ - $^1\text{H}$  COSY spectrum of compound **9a**.

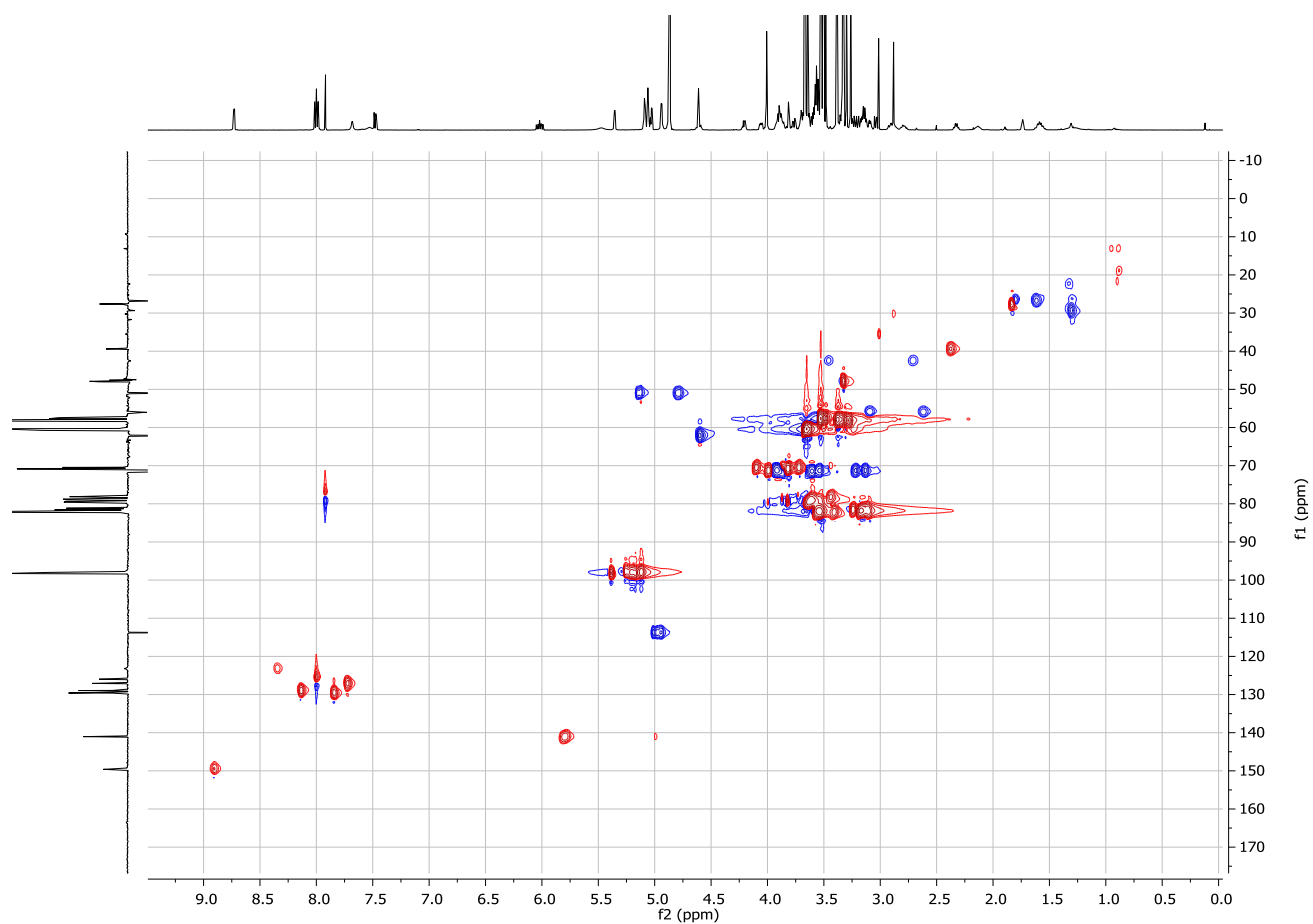

**Figure S19:** HSQC spectrum of compound **9a**.

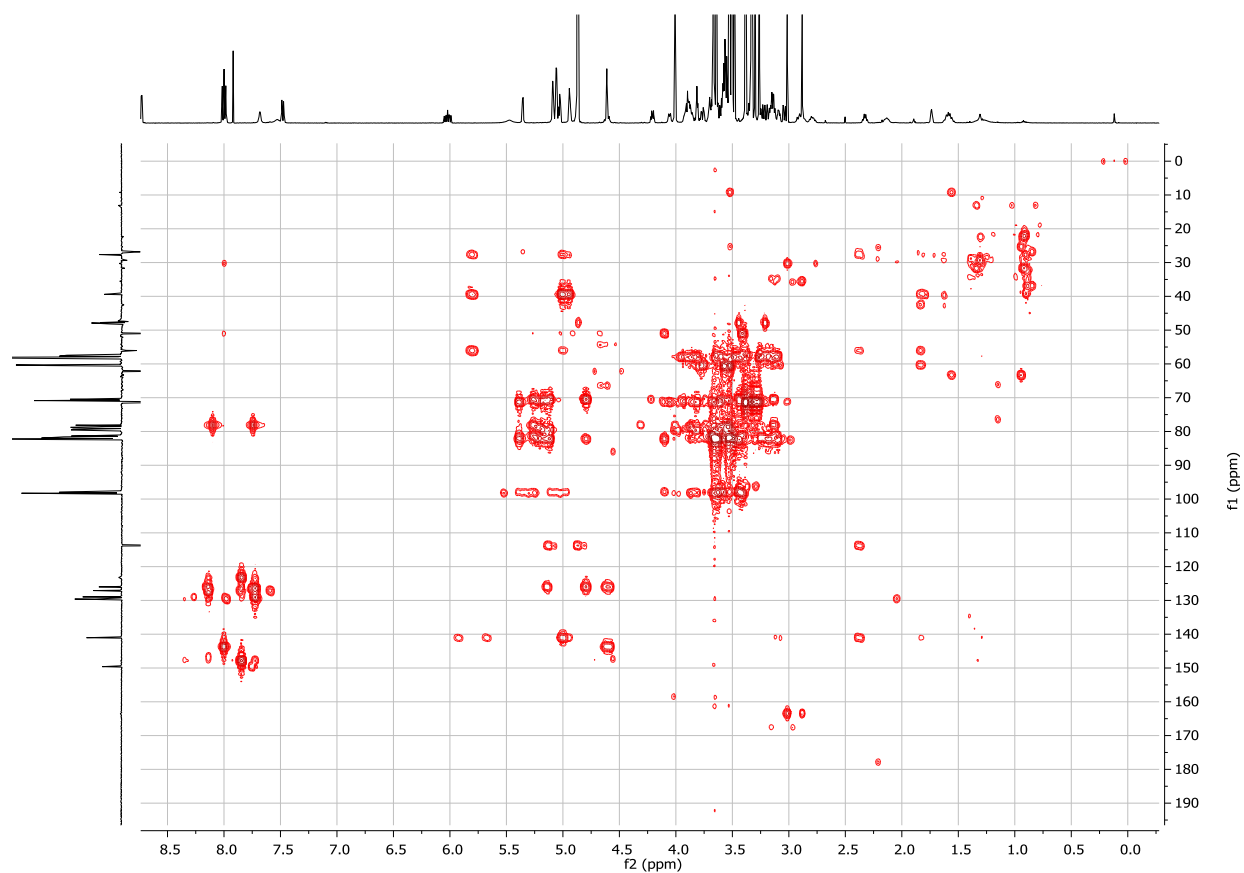

**Figure S20:** HMBC spectrum of compound **9a**.

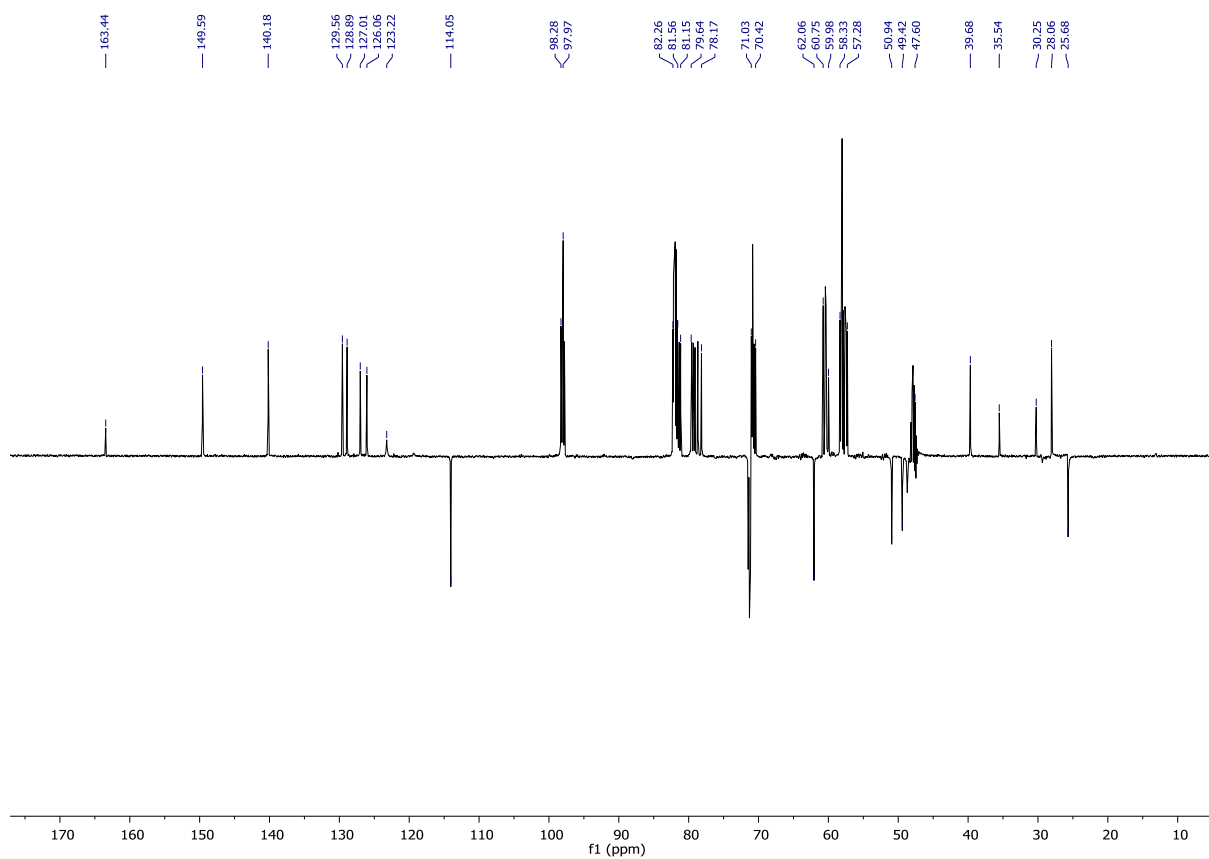

**Figure S21:**  $^{13}\text{C}$  DEPT spectrum of compound **9b**.

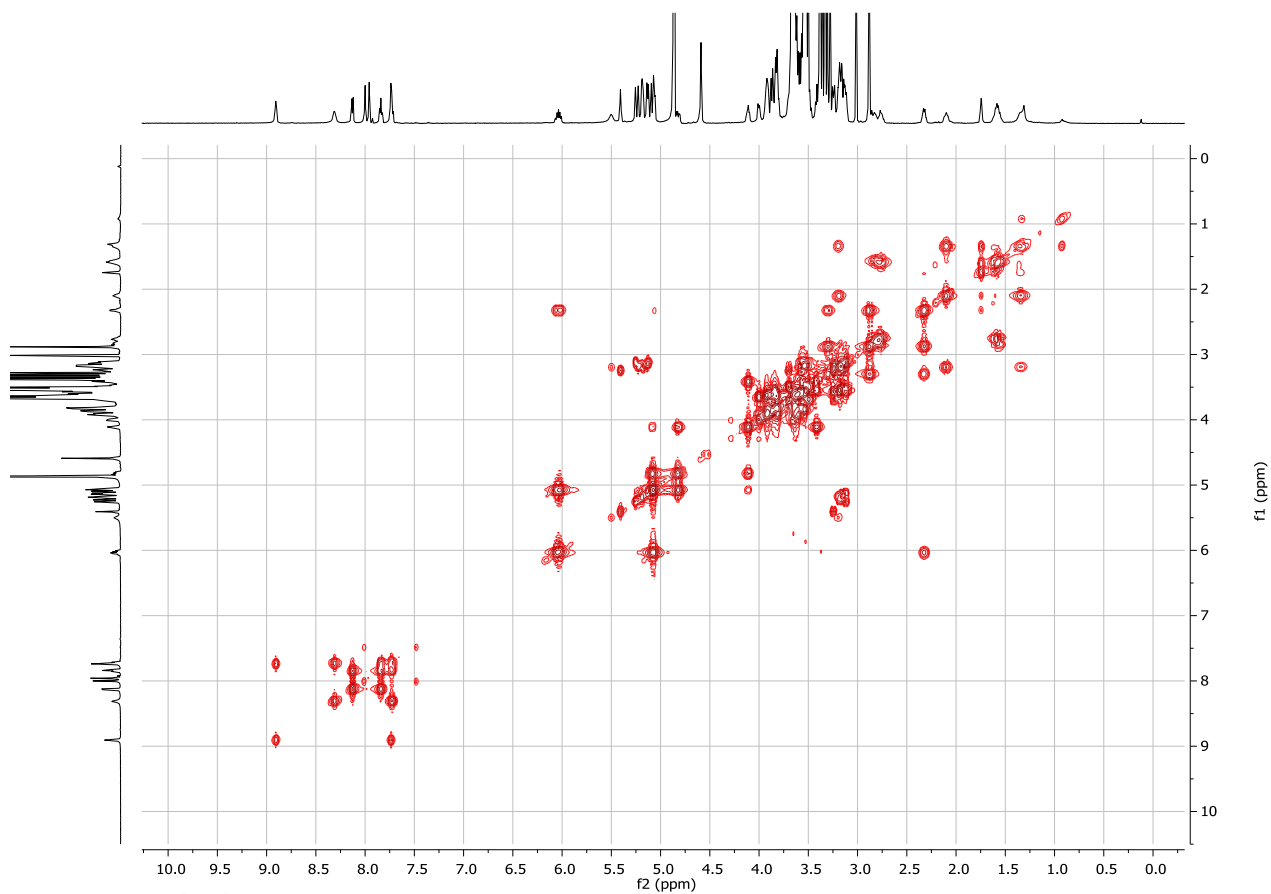

**Figure S22:**  $^1\text{H}$ - $^1\text{H}$  COSY spectrum of compound **9b**.

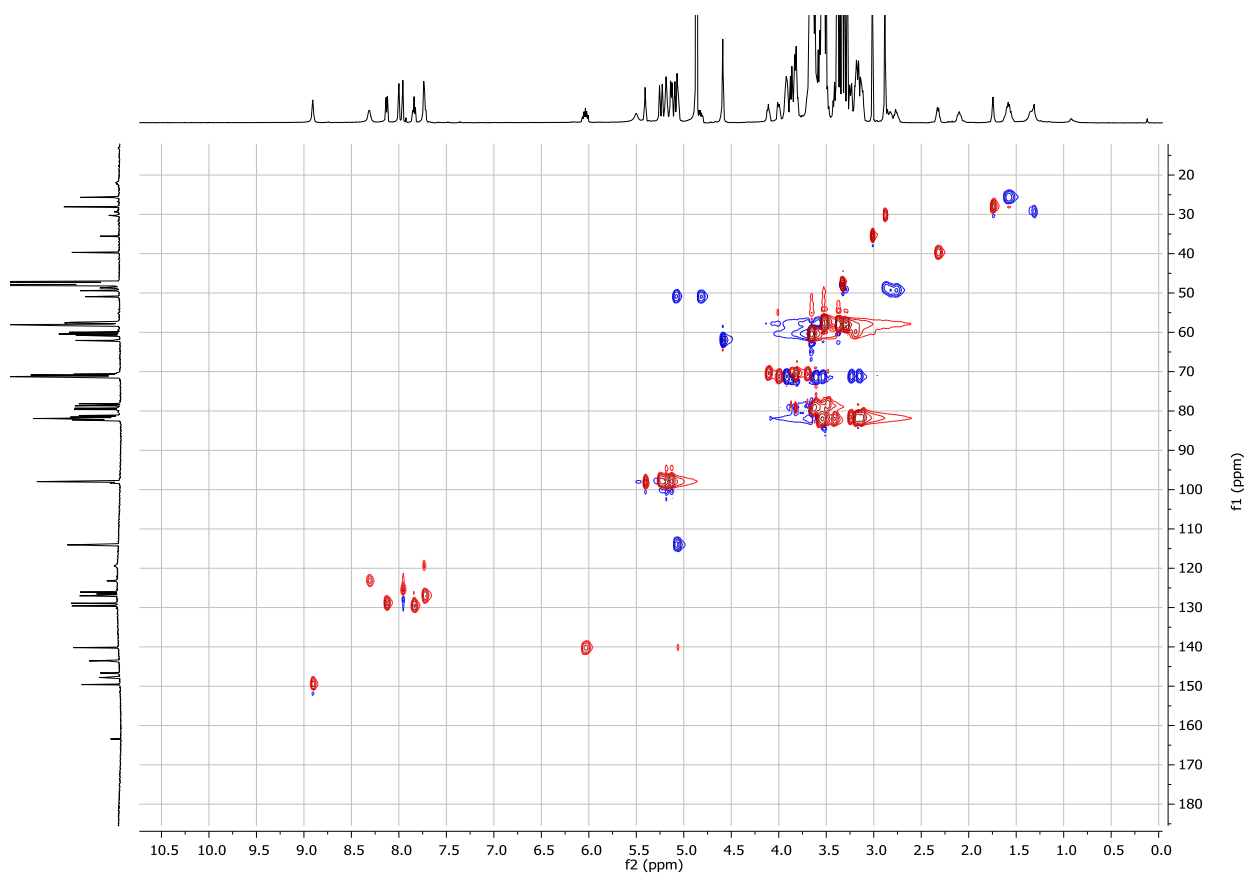

**Figure S23:** HSQC spectrum of compound **9b**.

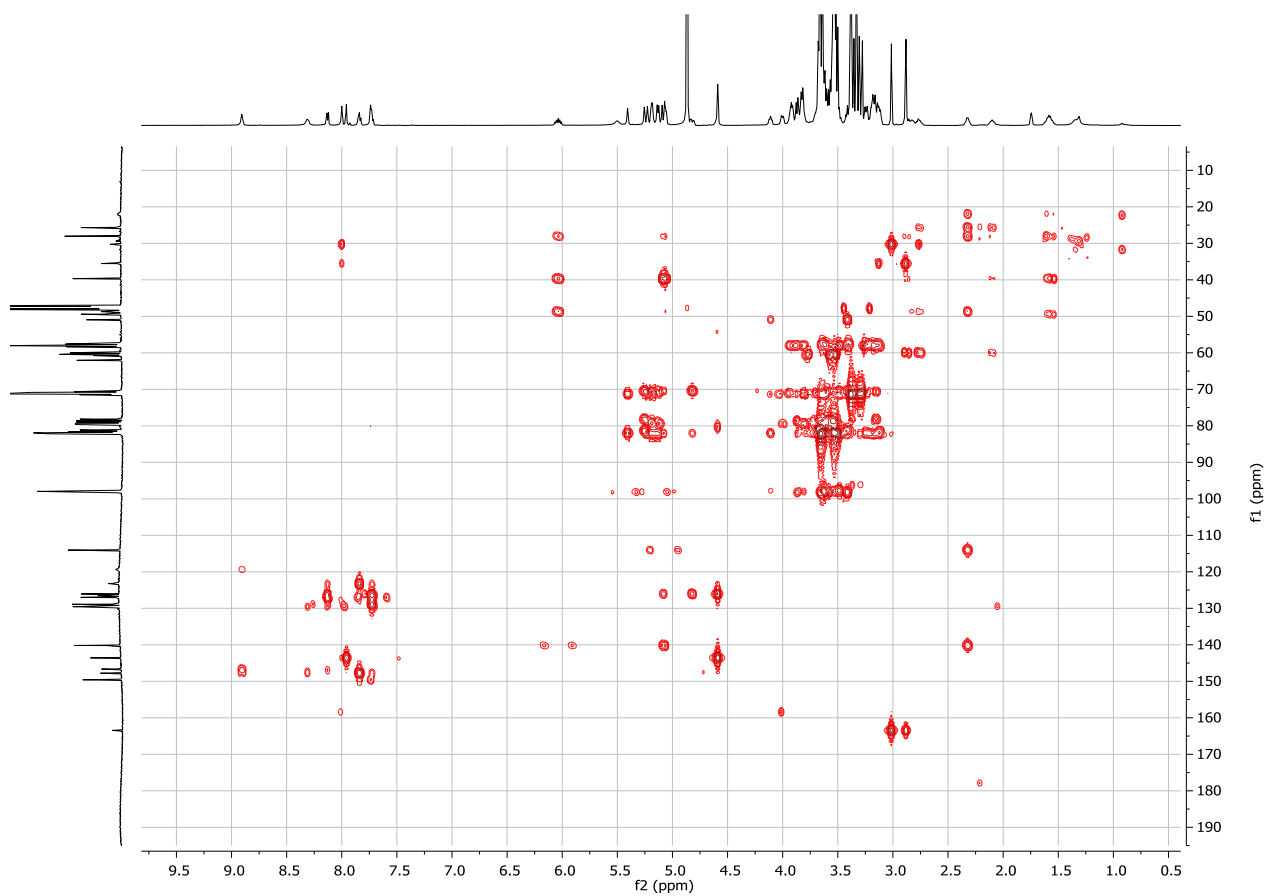

**Figure S24:** HMBC spectrum of compound **9b**.

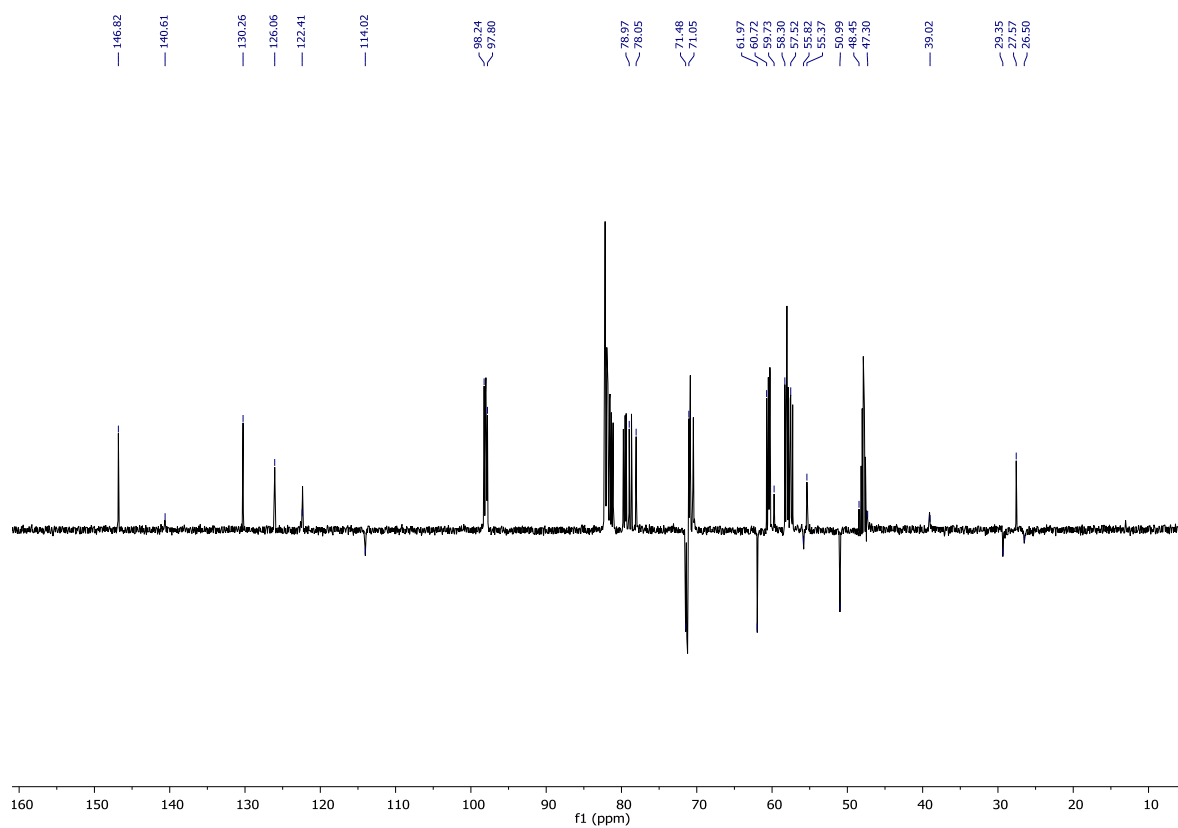

**Figure S25:**  $^{13}\text{C}$  DEPT spectrum of compound **9c**.

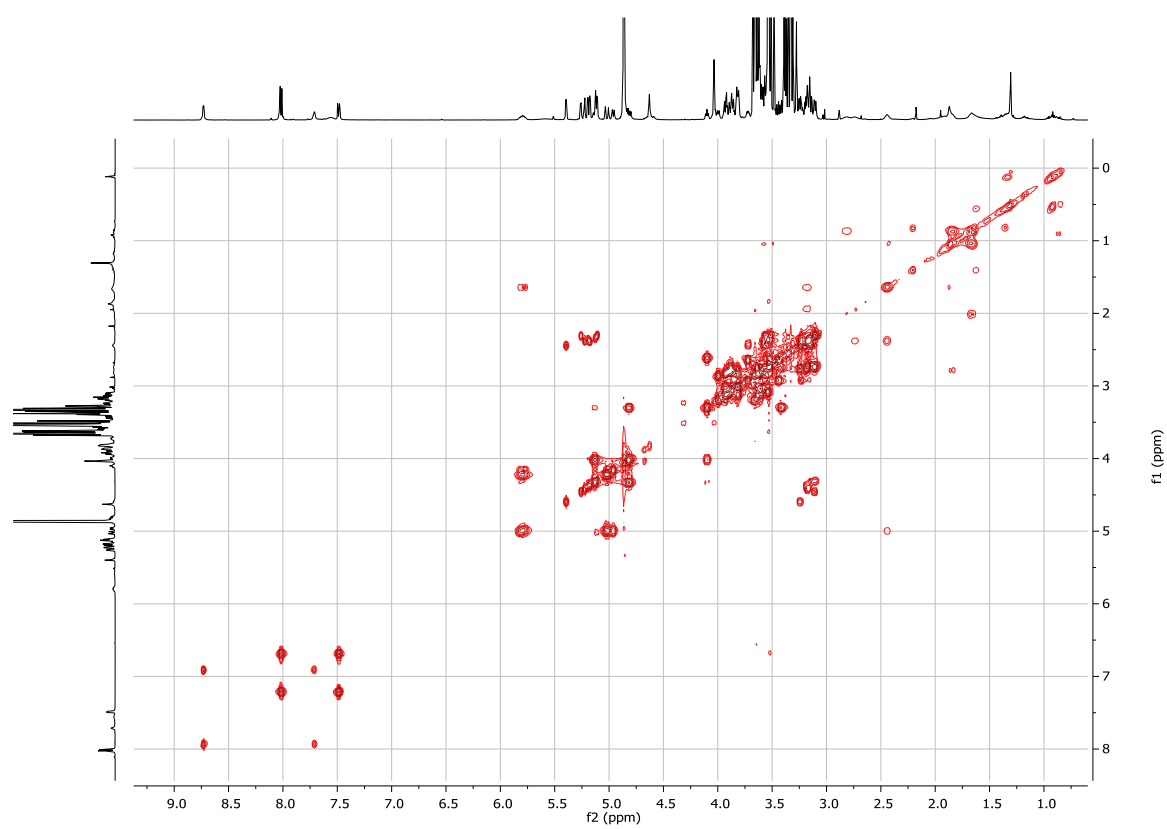

**Figure S26:**  $^1\text{H}$ - $^1\text{H}$  COSY spectrum of compound **9c**.

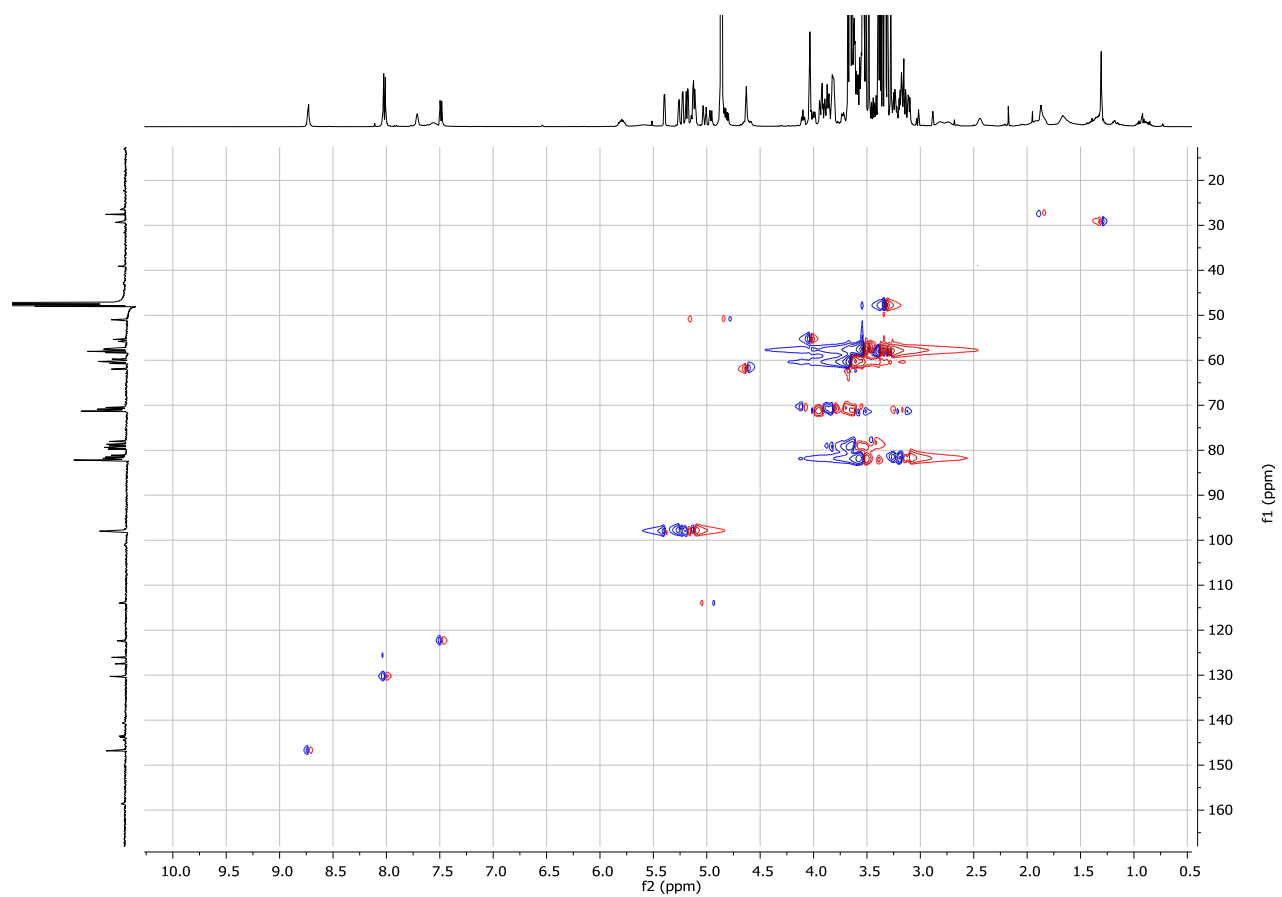

**Figure S27:** HSQC spectrum of compound **9c**.

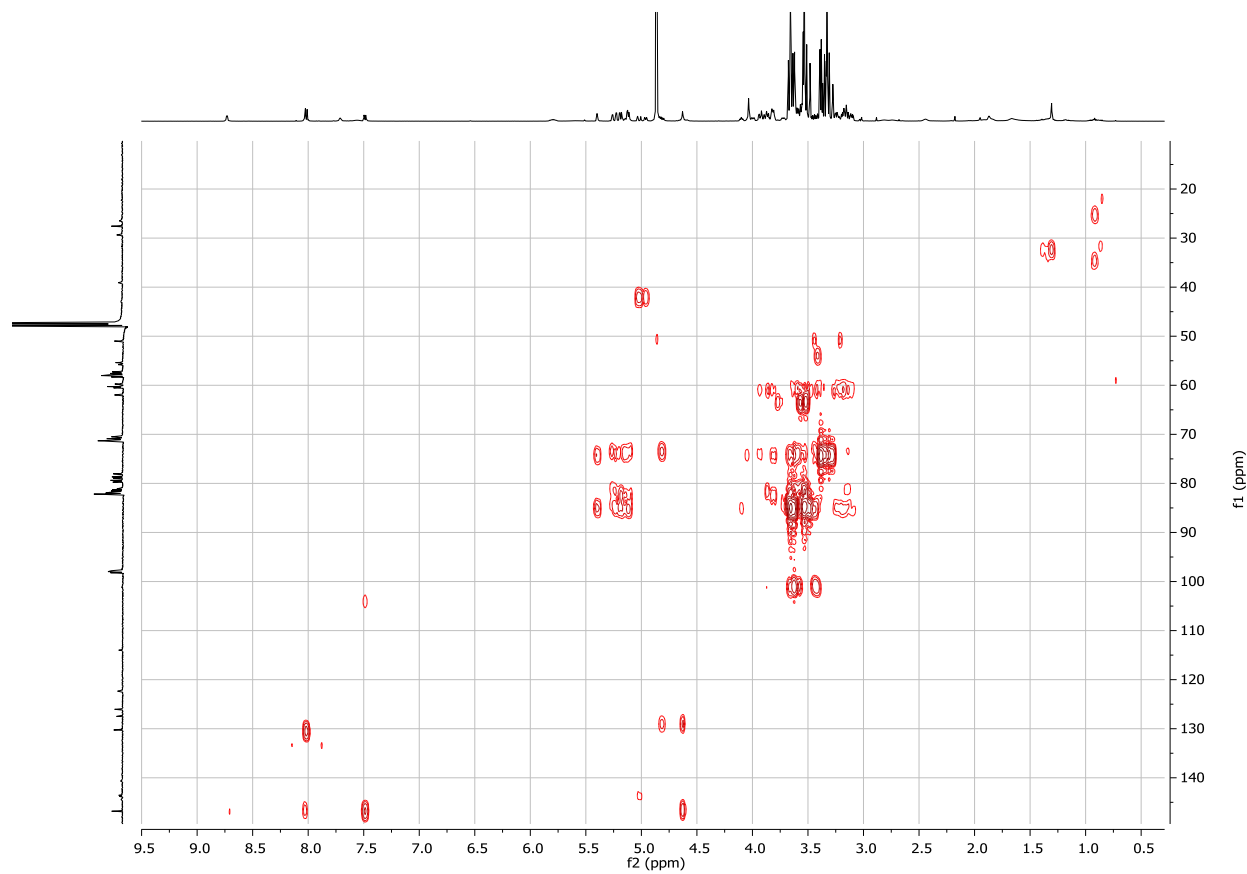

**Figure S28:** HMBC spectrum of compound **9c**.



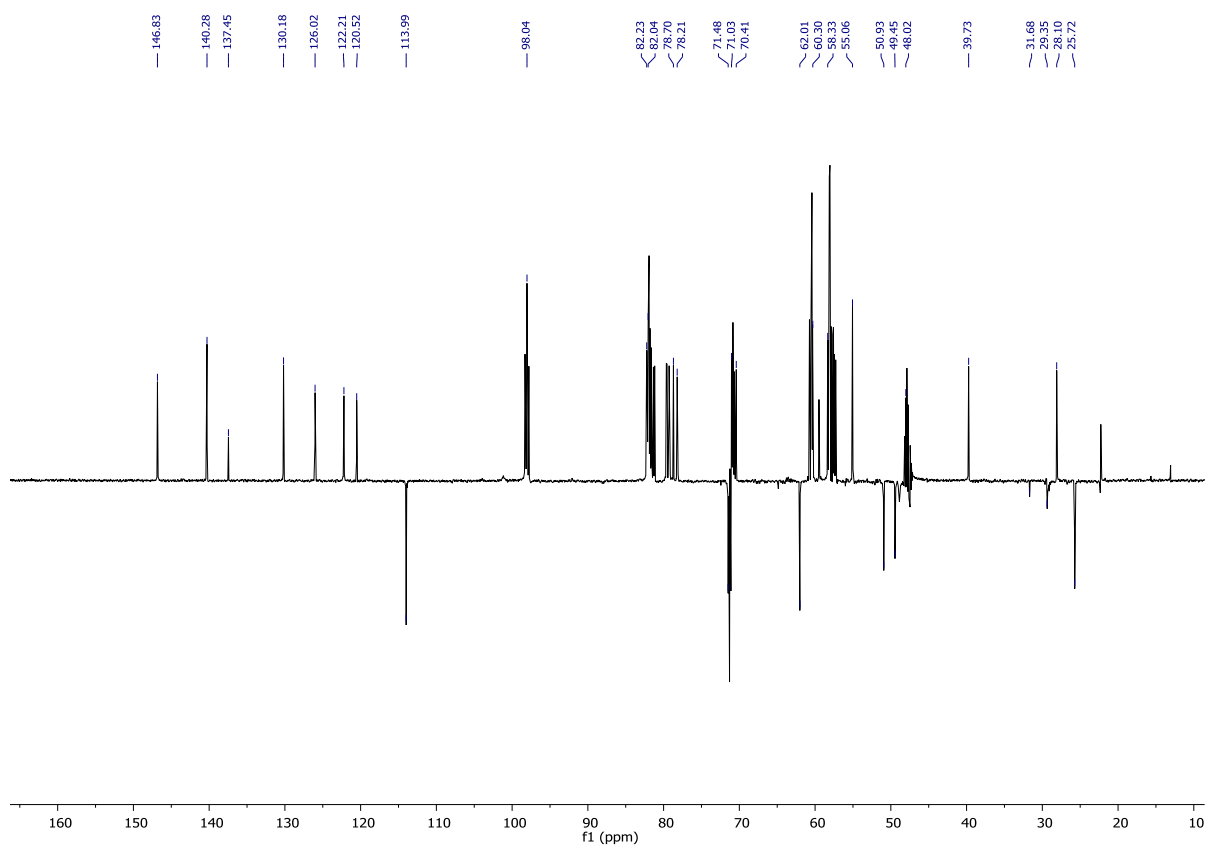

Figure S29:  $^{13}\text{C}$  DEPT spectrum of compound **9d**.

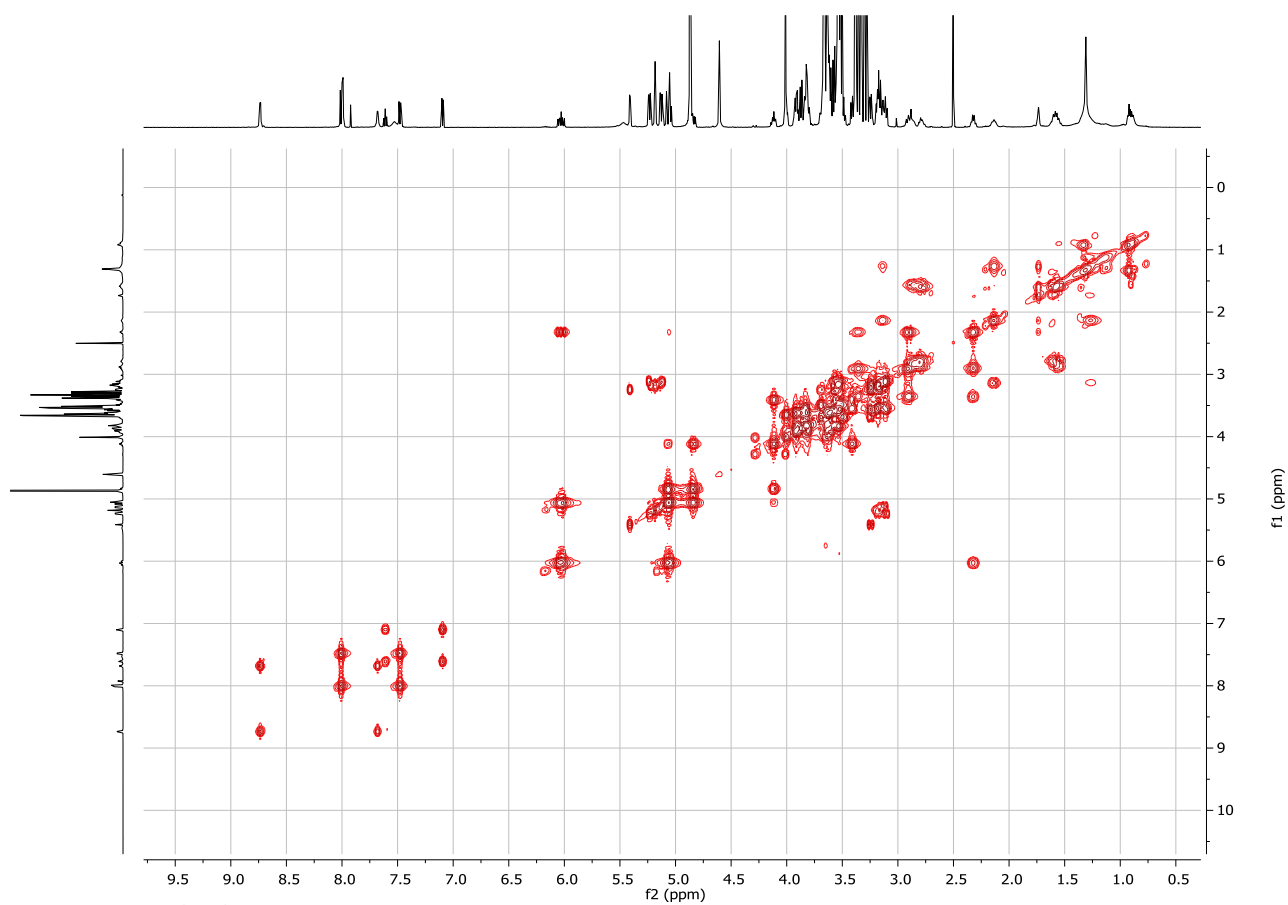

Figure S30:  $^1\text{H}$ - $^1\text{H}$  COSY spectrum of compound **9d**.

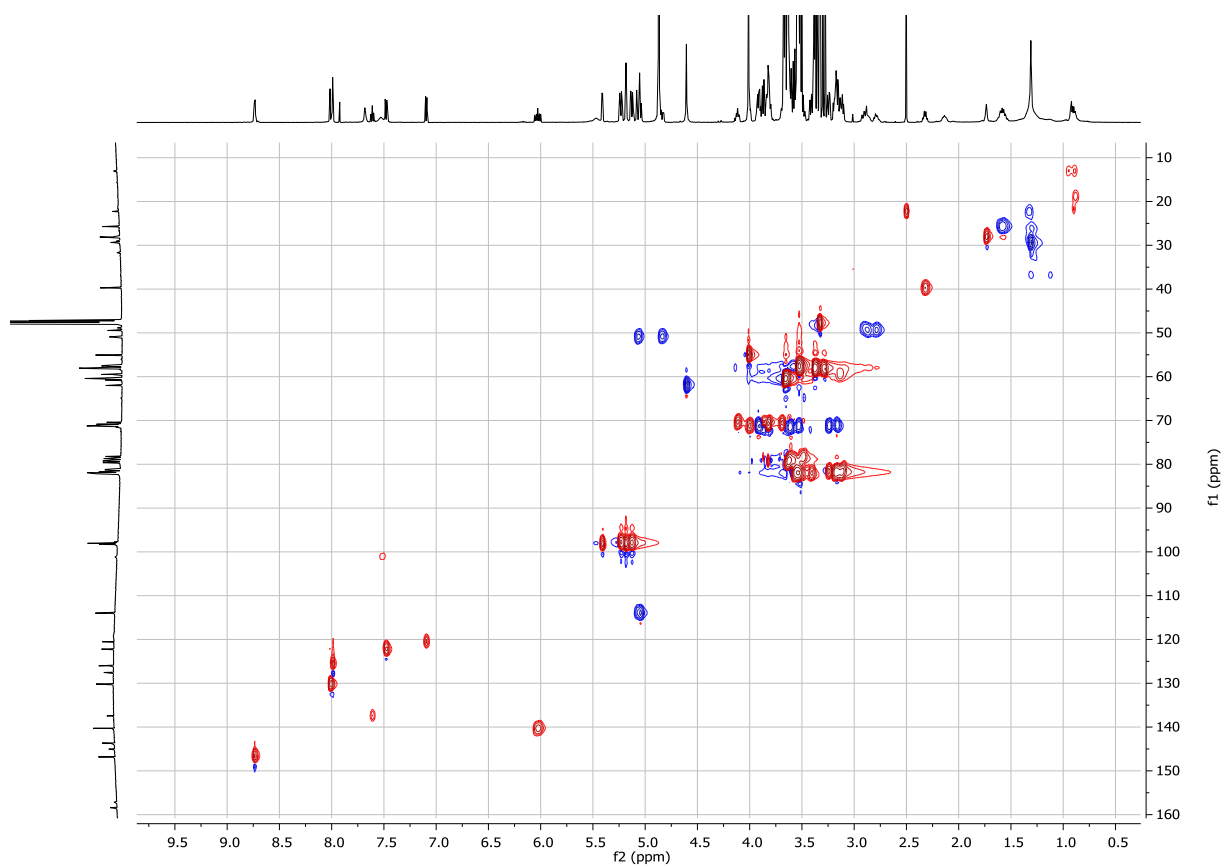

**Figure S31:** HSQC spectrum of compound **9d**.

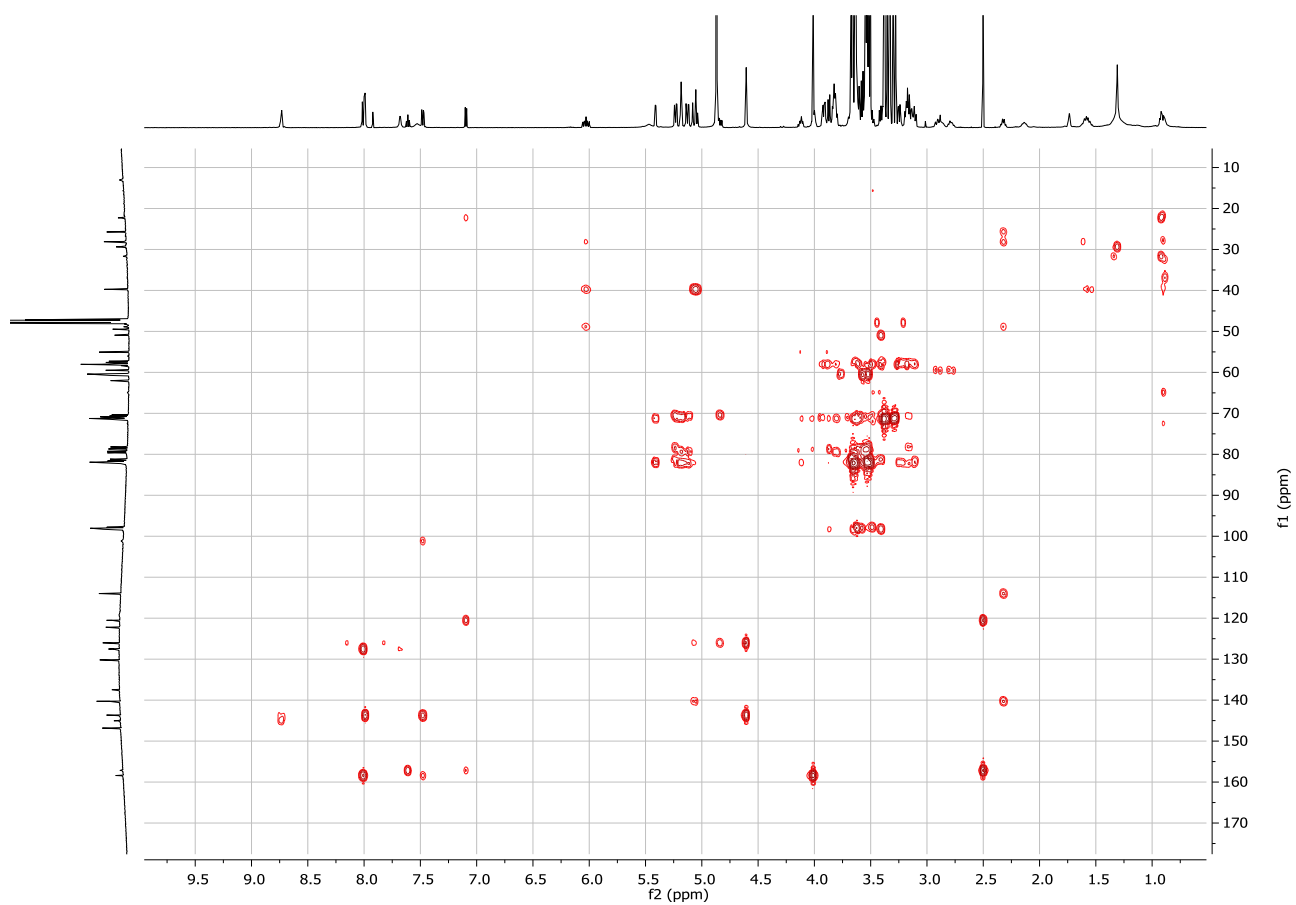

**Figure S32:** HMBC spectrum of compound **9d**.

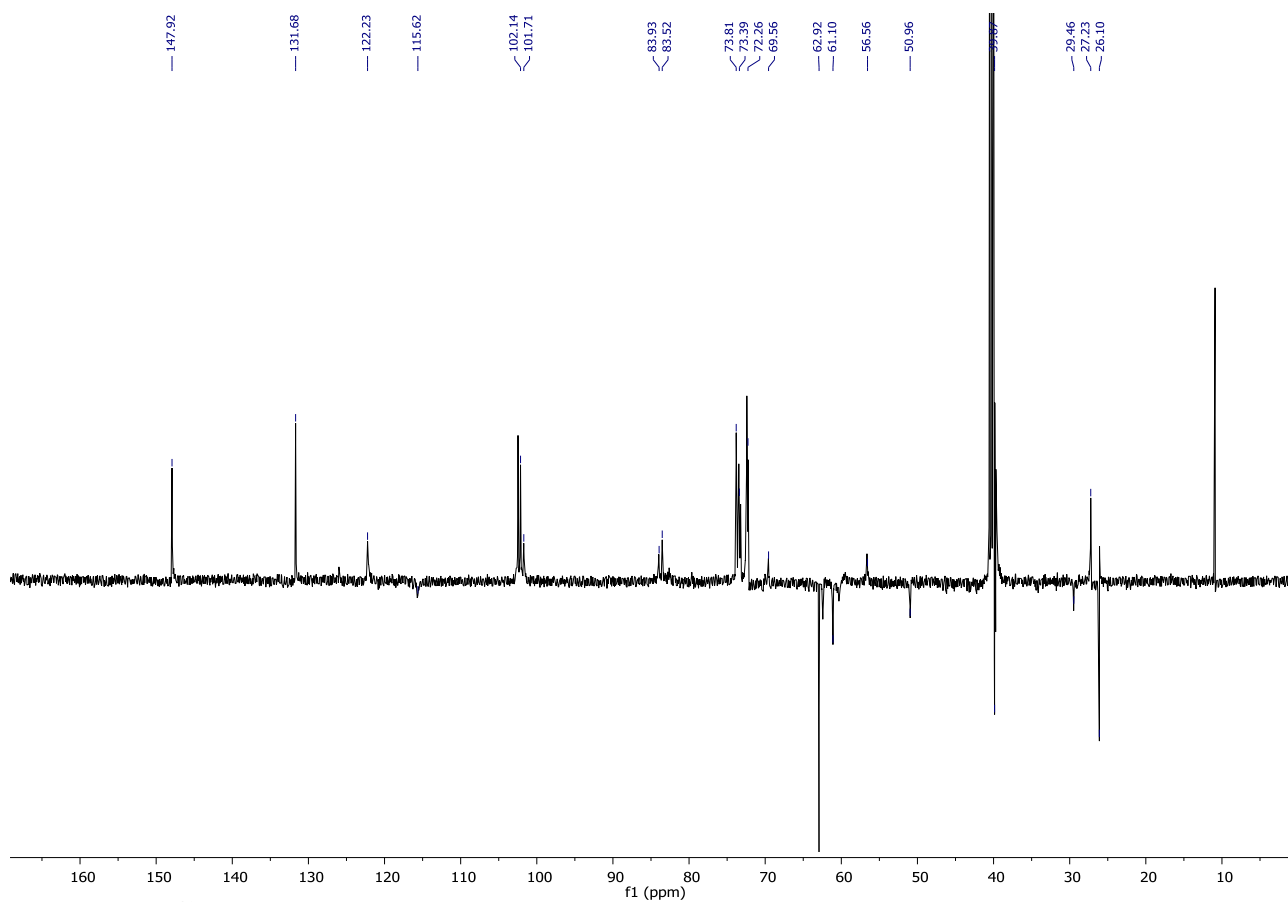

**Figure S33:**  $^{13}\text{C}$  DEPT spectrum of compound **11**.

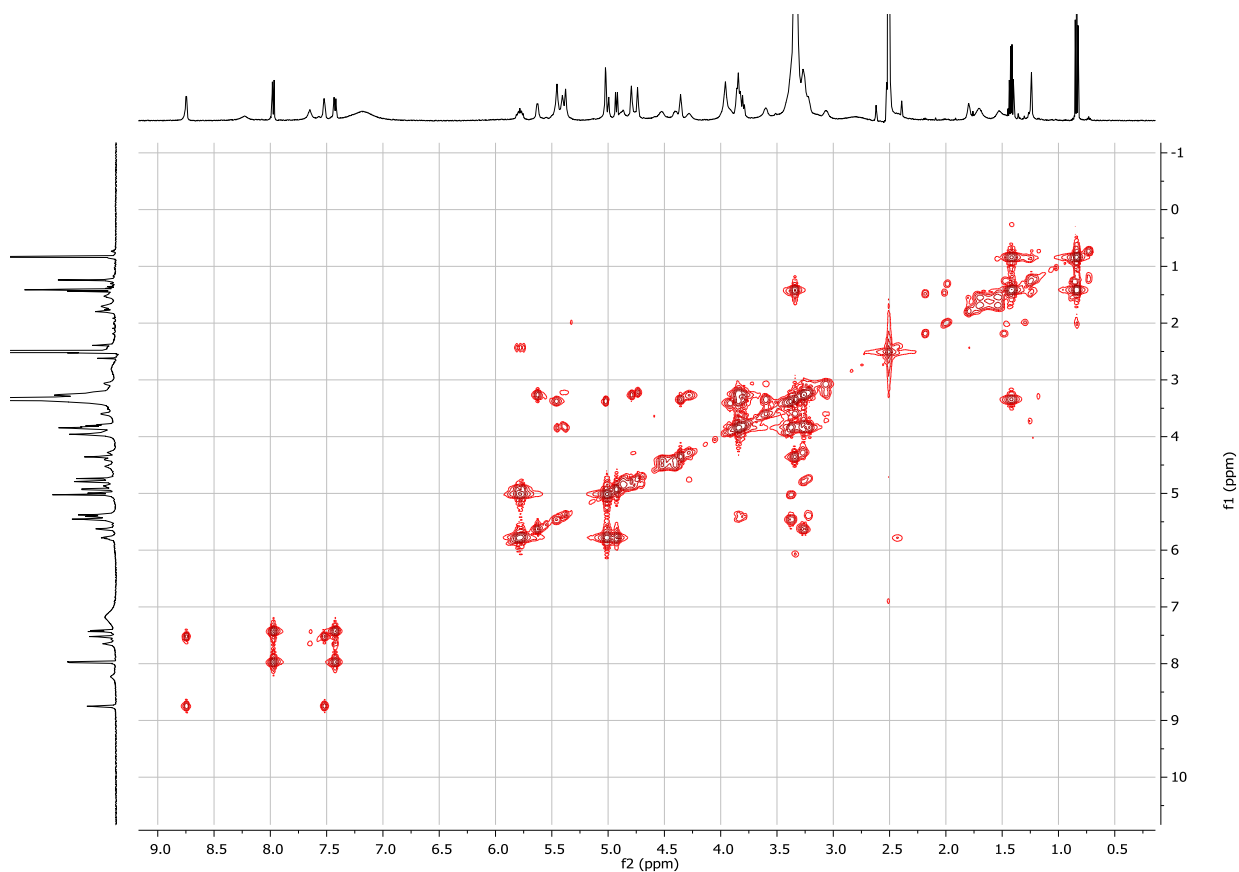

**Figure S34:**  $^1\text{H}$ - $^1\text{H}$  COSY spectrum of compound **11**.

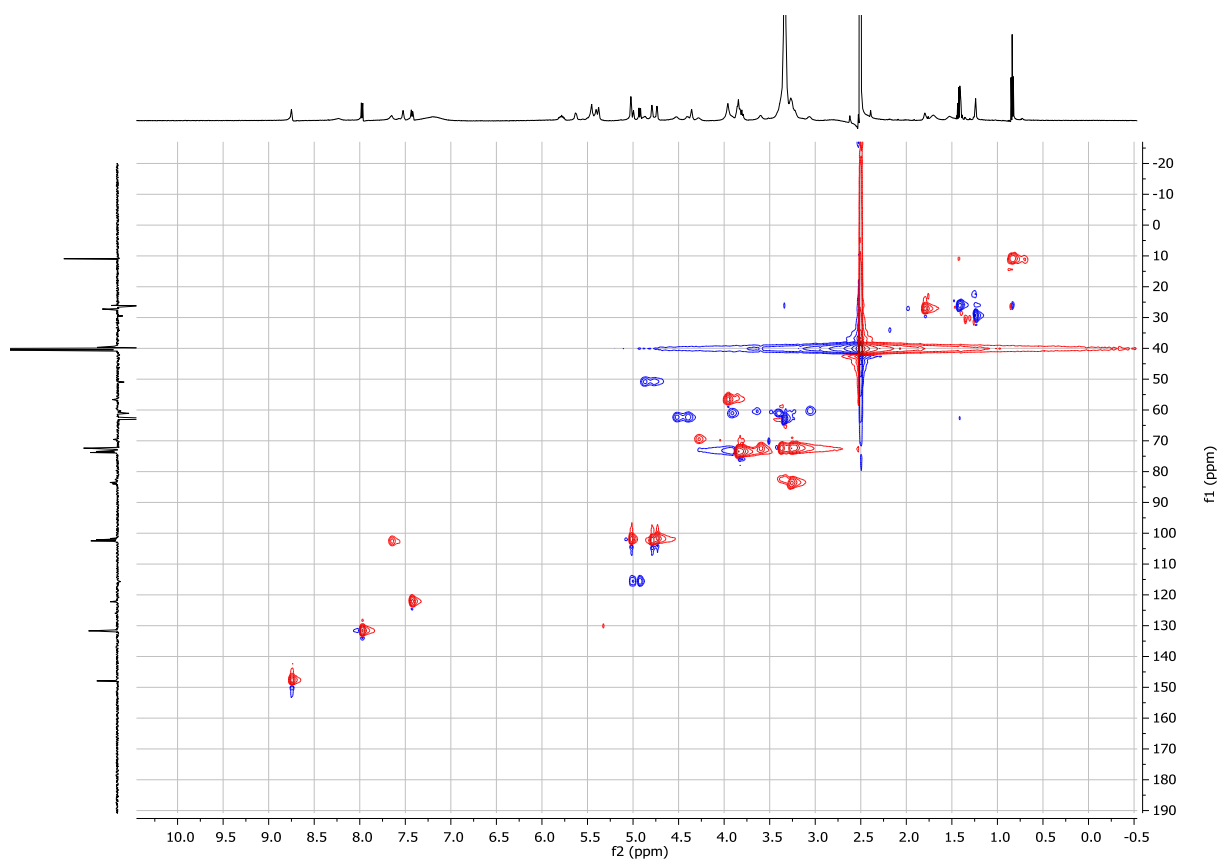

**Figure S35:** DEPT-edited HSQC spectrum of compound 11.

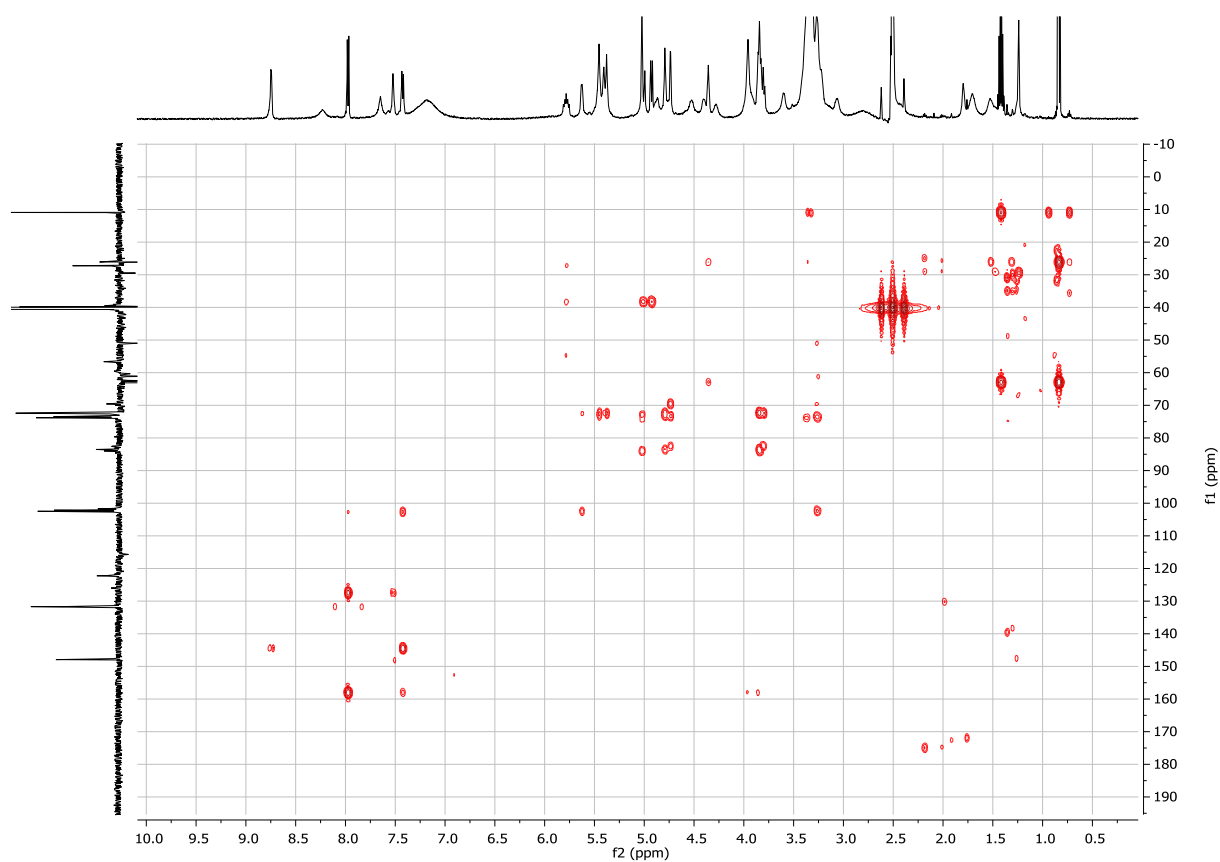

**Figure S36:** HMBC spectrum of compound 11.
